1 **The *ROP16<sup>III</sup>*-dependent early immune response determines the sub-acute CNS**  
2 **immune response and type III *Toxoplasma gondii* survival**

3

4 **Shraddha Tuladhar<sup>a</sup>, Joshua A. Kochanowsky<sup>a</sup>, Apoorva Bhaskara<sup>b</sup>, Yarah**  
5 **Ghotmi<sup>b,c</sup>, Anita A. Koshy<sup>a,b,d</sup>**

6

7 **<sup>a</sup>Department of Immunobiology, University of Arizona, Tucson, Arizona, USA**

8 **<sup>b</sup>Bio5 Institute, University of Arizona, Tucson, Arizona, USA**

9 **<sup>c</sup>Undergraduate Biology Research Program (UBRP), University of Arizona,**

10 **Tucson, Arizona, USA**

11 **<sup>d</sup>Department of Neurology, University of Arizona, Tucson, Arizona, USA**

12

13

14 **Running Head: *Toxoplasma* strain-specific CNS immune responses**

15

16 **#Address correspondence to Anita A. Koshy, [akoshy@email.arizona.edu](mailto:akoshy@email.arizona.edu).**

17

18

19

20

21

22

23

24 **Abstract**

25

26 *Toxoplasma gondii* is an intracellular parasite that persistently infects the CNS and that  
27 has genetically distinct strains which provoke different acute immune responses. How  
28 differences in the acute immune response affect the CNS immune response is  
29 unknown. To address this question, we used two persistent *Toxoplasma* strains (type II  
30 and type III) and examined the CNS immune response at 21 days post infection (dpi).  
31 Contrary to acute infection studies, type III-infected mice had higher numbers of total  
32 CNS T cells and macrophages/microglia but fewer alternatively activated macrophages  
33 (M2s) and regulatory T cells (Tregs) than type II-infected mice. By profiling splenocytes  
34 at 5, 10 and 21 dpi, we determined that at 5 dpi type III-infected mice had more M2s  
35 while type II-infected mice had more classically activated macrophages (M1s) and these  
36 responses flipped over time. To test how these early differences influence the CNS  
37 immune response, we engineered the type III strain to lack ROP16 (*IIIΔrop16*), the  
38 polymorphic effector protein that drives the type III-associated M2 response. *IIIΔrop16*-  
39 infected mice showed a type II-like neuroinflammatory response with fewer infiltrating T  
40 cells and macrophages/microglia and more M2s and an unexpectedly low CNS parasite  
41 burden. At 5 dpi, *IIIΔrop16*-infected mice showed a mixed inflammatory response with  
42 more M1s, M2s, T effector cells, and Tregs, and decreased rates of infection of  
43 peritoneal exudative cells (PECs). These data suggested that type III parasites need the  
44 early ROP16-associated M2 response to avoid clearance, possibly by the Immunity-  
45 Related GTPases (IRGs), IFN-γ dependent proteins essential for murine defenses  
46 against *Toxoplasma*. To test this possibility, we infected IRG-deficient mice and found

47 that III $\Delta$ *rop16* parasites now maintained parental levels of PECs infection. Collectively,  
48 these studies suggest that, for the type III strain, *rop16<sub>III</sub>* plays a key role in parasite  
49 persistence and influences the sub-acute CNS immune response.

50

## 51 **Author Summary**

52

53 *Toxoplasma* is a ubiquitous intracellular parasite that establishes an asymptomatic brain  
54 infection in immunocompetent individuals. However, in the immunocompromised and  
55 the developing fetus, *Toxoplasma* can cause problems ranging from fever to  
56 chorioretinitis to severe toxoplasmic encephalitis. Emerging evidence suggests that the  
57 genotype of the infecting *Toxoplasma* strain may influence these outcomes, possibly  
58 through the secretion of *Toxoplasma* strain-specific polymorphic effector proteins that  
59 trigger different host cell signaling pathways. While such strain-specific modulation of  
60 host cell signaling has been shown to affect acute immune responses, it is unclear how  
61 these differences influence the sub-acute or chronic responses in the CNS, the major  
62 organ affected in symptomatic disease. This study shows that genetically distinct strains  
63 of *Toxoplasma* provoke strain-specific CNS immune responses and that, for one strain  
64 (type III), the acute and sub-acute immune responses and parasite survival are heavily  
65 influenced by a polymorphic parasite gene (*rop16<sub>III</sub>*).

66

## 67 **Introduction**

68

69           *Toxoplasma gondii* is a ubiquitous obligate intracellular parasite that chronically  
70 infects the brain, heart, and skeletal muscle of humans (1,2). Up to one third of the  
71 world's population is estimated to be chronically infected with *Toxoplasma* (3). While  
72 most infected people are asymptomatic, in some immunocompromised individuals and  
73 developing fetuses *Toxoplasma* can cause fever, chorioretinitis, toxoplasmic  
74 encephalitis, and even death (4). While the host immune status plays a key role in  
75 determining disease outcomes, clinical data suggest that the genotype of the infecting  
76 *Toxoplasma* strain may also play a role (5–14). *Toxoplasma* strains are classified into  
77 15 genetic haplotypes which include the three canonical strains — type I, type II, and  
78 type III (now haplotype 1, 2, and 3 and Clade A, D, and C respectively) (15–17). Of the  
79 canonical strains, type I and III are relatively genetically similar compared to type II.

80

81           Our understanding of how different *Toxoplasma* strains might cause distinct  
82 disease outcomes in mice and potentially humans has greatly expanded in the last  
83 decade. We now know that *Toxoplasma* highly manipulates host cells through the  
84 injections and secretion of effector proteins that can be polymorphic among strains. In  
85 turn these polymorphisms can profoundly affect the host cell response. For example,  
86 during acute *in vitro* infection of fibroblasts or immune cells only the type I/III allele of  
87 ROP16 (ROP16<sub>I/III</sub>), not the type II allele, causes direct and prolonged phosphorylation  
88 of the transcription factors STAT3 and STAT6 (18,19). In macrophages, this prolonged  
89 activation of STAT3/6 leads to decreased production of IL-12, a key pro-inflammatory  
90 cytokine (19). Conversely, only the type II allele of GRA15 (GRA15<sub>II</sub>), not the type I/III  
91 allele, activates the transcription factor, NFκB, which leads to host cell production of

92 pro-inflammatory cytokines (20,21). In addition, strains that express Gra15<sub>II</sub> polarize  
93 infected macrophages to a classically activated phenotype whereas, strains that  
94 express ROP16<sub>I/III</sub> polarize macrophages to an alternatively activated phenotype  
95 (19,21,22). Yet, how these strain-specific modulations of infected cells influence global  
96 immune responses, or sub-acute or chronic immune responses in the central nervous  
97 system (CNS), remains unknown. The only studies looking at *Toxoplasma* strain-  
98 specific tissue immune responses during chronic infection were done 20 years ago and  
99 used histology to define the CNS immune response. While these studies identified  
100 strain-specific neuroinflammatory responses, the strains also produced different CNS  
101 parasite burdens making it impossible to determine if the immune response differences  
102 were simply driven by the differences in parasite burden (23,24).

103

104 To address this gap and leverage our increased understanding of strain-specific  
105 effects, we infected mice with a representative strain from either of the two canonical,  
106 encysting *Toxoplasma* strains (type II or type III) and then defined the  
107 neuroinflammatory response using quantitative immunohistochemistry (IHC), multiplex  
108 cytokine analysis, and flow cytometry. At 21 days post infection (dpi), compared to type  
109 II-infected mice, type III-infected mice showed a higher number of macrophages,  
110 infiltrating T cells, and levels of pro-inflammatory cytokines (e.g IFN- $\gamma$ ) in the CNS, even  
111 though type II and type III-infected mice showed the same CNS parasite burden. In  
112 addition, our flow cytometry analyses of CNS and splenic mononuclear cells showed  
113 that type III-infected mice had fewer alternatively activated macrophages (M2s) and  
114 regulatory T cells (Tregs) compared to type II-infected mice, the opposite of what is

115 seen with acute infection *in vivo* and *in vitro* (21,22). By examining the peripheral  
116 macrophage immune response over time, we determined that, early in infection, type III-  
117 infected mice have more M2s compared to type II-infected mice and that this response  
118 changes over time, leading to fewer M2s in the spleen and brain of type III-infected mice  
119 by 21 dpi. To define if the differences in the early macrophage response influenced the  
120 subsequent CNS immune response, we engineered the type III strain to lack the *rop16*  
121 gene (*IIIΔrop16*), which, as noted above, is the driver of the early type III-associated M2  
122 response (19,21). Consistent with our hypothesis, compared to the parental type III  
123 strain, *IIIΔrop16*-infected mice showed a more type II-like CNS immune response with  
124 fewer macrophages and infiltrating T cells and an increase in M2s in the CNS.  
125 Unexpectedly, the *IIIΔrop16*-infected mice showed a substantial decrease in the CNS  
126 parasite burden; a mixed acute inflammatory immune response (i.e. an increase in  
127 classically activated macrophages (M1s), M2s, T effector cells, and Tregs); and rapid  
128 clearance from the site of inoculation. As the type III strain is sensitive to destruction by  
129 Immunity-Related GTPases (IRGs) (25,26), these results suggested that, to persist, the  
130 type III strain requires *rop16<sub>III</sub>* to dampen the initial immune response, including the IRG  
131 response. We tested this possibility by infecting mice that lack the IRG response (27)  
132 and found that the *IIIΔrop16* strain now maintained parental levels of infection at the site  
133 of inoculation. Collectively these data suggest that *Toxoplasma* strain-specific immune  
134 responses persist in the sub-acute phase of disease and that, for the type III strain,  
135 *rop16<sub>III</sub>* is required for persistence and plays a role in determining acute and sub-acute  
136 systemic and CNS immune responses.  
137

138 **Results**

139

140 **Type III-infected mice have an increased CNS T cell and macrophage/microglia**  
141 **response compared to type II-infected mice**

142

143 To determine if genetically divergent *Toxoplasma* strains cause strain-specific  
144 CNS immune responses, we infected mice with either a type II (Prugniaud) or type III  
145 (CEP) strain and analyzed the CNS macrophage and T cell immune response at 21 dpi,  
146 which we consider a sub-acute time point of CNS infection. We focused on the  
147 macrophages/microglial and T cell responses because prior work has established that  
148 these cells are essential for controlling acute and chronic toxoplasmosis (1,28–31). To  
149 quantify macrophages/microglia and T cells in the CNS after *Toxoplasma* infection, we  
150 stained brain sections with antibodies against Iba-1, a pan macrophages/microglial  
151 marker, or CD3, a pan-T cell surface marker. Stained sections were then analyzed by  
152 light microscopy. We found that type III-infected mice had approximately twice the  
153 number of CNS macrophages/microglia compared to type II-infected mice (**Fig. 1A,B**).  
154 Type III-infected mice also had a similar increase in the number of CNS T cells (**Fig.**  
155 **1C,D**).

156

157 To determine how the influx of these immune cells changed the global CNS  
158 cytokine/chemokine environment, we isolated and analyzed protein from brain  
159 homogenates of control (saline inoculated) or infected mice using a 25-plex cytokine  
160 and chemokine LUMINEX assay. As expected, compared to control mice, type II and

161 type III-infected mice showed a  $\geq 2$ -fold increase in most of the pro-inflammatory  
162 cytokines and chemokines in the panel (**Table S1**). A subset of these cytokines and  
163 chemokines also showed a  $\geq 2$ -fold increase in type III-infected mice compared to type  
164 II-infected mice (**Fig. 1F**).

165

166 Together, these data show that, at 21 dpi, type III-infected mice have significantly  
167 higher numbers of both macrophages/microglia and T cells in the CNS as compared to  
168 type II-infected mice. Consistent with this increase in CNS immune cells, type III-  
169 infected mice have a stronger CNS pro-inflammatory cytokine and chemokine milieu  
170 compared to type II-infected mice.

171

172 **Differences in the CNS immune response between type II and type III-infected**  
173 **mice are not driven by parasite burden**

174

175 Given the consistent differences we found in the number of  
176 macrophages/microglia and T cells (**Fig. 1**), we sought to determine if these differences  
177 simply reflected disparities in parasite burden. To address this question, we analyzed  
178 CNS parasite burden by two methods. First, using DNA isolated from brain  
179 homogenates, we performed quantitative PCR (qPCR) for the *Toxoplasma*-specific  
180 gene B1 (32–35). Second, we quantified CNS cyst numbers by performing  
181 immunofluorescent assays on brain sections using Dolichos biflorous agglutinin (DBA),  
182 a lectin that stains the cyst wall, to identify cysts (36). By both measures, we found that



183 type II and type III-infected mice had equivalent CNS parasite burdens at 21 dpi (**Fig.**  
184 **2A,B**).

185

186 To ensure that differences in parasite dissemination to the CNS were not driving  
187 the immune response differences, we quantified the parasite burden in the spleen, liver,  
188 lungs, and CNS at 5, 10, and 21 dpi using B1 qPCR. At these time points, we found that  
189 the parasite burden in these different organs did not differ between type II and type III-  
190 infected mice (**Fig. 2C-F**).

191

192 These data suggest that the CNS immune response differences we identified in  
193 type II and type III infection are not secondary to major differences in parasite  
194 dissemination to or persistence in the CNS, at least up to 21 dpi.

195

196 **Type III-infected mice have fewer alternatively activated macrophages and**  
197 **regulatory T cells in the CNS and spleen at 21 dpi**

198

199 While our immunohistochemistry (IHC) data suggest that type III infection causes  
200 a higher number of macrophages and T cells to infiltrate into the CNS compared to type  
201 II infection, they do not address whether infection with type II or type III parasites affects  
202 the phenotype of these cells. To address this question, we isolated immune cells from  
203 the CNS of *Toxoplasma*-infected mice and then used flow cytometry to identify the  
204 frequency of different immune cell populations, focusing primarily on  
205 macrophages/microglia and T cells. Additionally, we performed the same studies on

206 splenocytes from the infected mice to define if the CNS immune response was tissue-  
207 specific or merely reflective of differences in the global immune response.

208 As these studies represented the first studies to use flow cytometry to compare  
209 strain-specific CNS macrophage and T cell responses, we sought to profile major  
210 classes of cells by using previously identified markers (37–40). To this end, we focused  
211 on classically activated macrophages (M1s), alternatively activated macrophages (M2s),  
212 effector T cells (Teffs), and regulatory T cells (Tregs). The gating schemes we used are  
213 shown in **Fig. S1** (macrophages) and **Fig. S2** (T cells). In our analyses, we placed  
214 CD80/CD86 (M1s) and MMR/CXCR3 (M2s) in the same channels because  
215 transcriptional data have shown that M1s consistently co-express CD80 and CD86 (38)  
216 and a prior study that examined CNS macrophages in type II-infected mice showed that  
217 macrophages that express MMR also express CXCR3 (41). To validate this staining  
218 protocol, we verified that we obtained the same results regardless of whether CD80 and  
219 CD86 or CXCR3 and MMR are placed in individual channels or in the same channels  
220 (**Fig S3**). Finally, to further confirm the identity of the M1/M2 populations we isolated  
221 CD80<sup>+</sup>/CD86<sup>+</sup> or MMR<sup>+</sup>/CXCR3<sup>+</sup> splenocytes and used qPCR to determine the  
222 expression of IL-12, Arg-1, and IL-4 (21,22,39,41). As expected, the population we  
223 defined as M1s (CD80<sup>+</sup>/CD86<sup>+</sup>) expressed IL-12 and not Arg-1 and IL-4, while the M2s  
224 (MMR<sup>+</sup>/CXCR3<sup>+</sup>) expressed Arg-1 and IL-4 but not IL-12 (**Fig. S4A-D**). In addition,  
225 approximately 35% of our CD80<sup>+</sup>/CD86<sup>+</sup> population was positive for IFN- $\gamma$  while less  
226 than 1% of the MMR<sup>+</sup>/CXCR3<sup>+</sup> population was positive for IFN- $\gamma$  (**Fig. S4E,F**).  
227 Collectively, these data highly suggest that the macrophage population identified by  
228 CD45<sup>+</sup>, F4/80<sup>+</sup>, CD11b<sup>hi</sup>, CD11c<sup>lo</sup>, CD80<sup>+</sup>/CD86<sup>+</sup> staining is consistent with prior

229 descriptions of M1 macrophages and is pro-inflammatory. Similarly, the macrophage  
230 population identified by CD45<sup>+</sup>, F4/80<sup>+</sup>, CD11b<sup>hi</sup>, CD11c<sup>lo</sup>, MMR<sup>+</sup>/CXCR3<sup>+</sup> staining is  
231 consistent with prior descriptions of M2 macrophages, which are less inflammatory.  
232 From here forward, we will simply denote these populations as M1s and M2s.

233         Based upon these validations, our flow analyses of the CNS immune cells  
234 showed that type III-infected mice had approximately half the number and frequency of  
235 M2s compared to type II-infected mice (**Fig. 3A,B**). For M1s, we observed no significant  
236 difference in the absolute number or frequency between the groups (**Fig. 3C,D**). In  
237 addition, we found that type III-infected mice had half the number and frequency of  
238 Tregs (CD3<sup>+</sup>, CD4<sup>+</sup>, FoxP3<sup>+</sup>) as compared to type II-infected mice (**Fig. 3E,F**) and no  
239 difference in the number or frequency of Teffs (CD3<sup>+</sup>, CD4<sup>+</sup> or CD8<sup>+</sup>, CD44<sup>+</sup>) (**Table**  
240 **S2**).

241

242         Consistent with our findings in the CNS we observed that splenocytes from type  
243 III-infected mice had approximately half the absolute number and frequency of M2s as  
244 compared to splenocytes from type II-infected mice (**Fig. 4A,B**). There was no  
245 significant difference in the absolute number and frequency of M1s in the spleen (**Fig.**  
246 **4C,D**). Akin to our CNS data, splenocytes from type III-infected mice had half the  
247 number and frequency of Tregs compared to splenocytes from type II-infected mice  
248 (**Fig. 4E,F**).

249

250         The numbers of total CD3<sup>+</sup> T cells, CD4 T cells (CD3<sup>+</sup>, CD4<sup>+</sup>), CD8 T cells  
251 (CD3<sup>+</sup>, CD8<sup>+</sup>), exhausted T cells (CD3<sup>+</sup>, CD8<sup>+</sup>, PD-1<sup>+</sup>), or macrophages (CD45<sup>+</sup>, F4/80<sup>+</sup>,

252 CD11b<sup>hi</sup>, CD11c<sup>lo</sup>) in either the CNS or the spleen (**Table S2**) were not statistically  
253 different. In addition, to allow us to track infected cells and/or cells injected with parasite  
254 effector proteins (42), we infected Cre reporter mice that only express GFP after Cre-  
255 mediated recombination (43) with mCherry<sup>+</sup> parasite strains that trigger Cre-mediated  
256 recombination (42,44). At 21 dpi, we identified no mCherry<sup>+</sup> and/or GFP<sup>+</sup> cells in the T  
257 cell or macrophage populations isolated from the CNS or spleen. The lack of GFP<sup>+</sup>  
258 immune cells in the CNS at 21 dpi is consistent with our prior work using the same  
259 system (45).

260

261         These data strongly suggest that in addition to quantitative differences in the  
262 CNS immune response, type II and III-infected mice show differences in the phenotype  
263 of immune cells infiltrating into the CNS. Type III infection provokes a more pro-  
264 inflammatory sub-acute CNS immune response with a relative decrease in the  
265 macrophages (M2s) and T cells (Tregs) that suppress the pro-inflammatory response.  
266 In addition, as these differences are also seen in splenocytes, these data suggest that,  
267 at 21 dpi, the CNS immune response is reflective of the systemic immune response.  
268 Finally, the lack of mCherry<sup>+</sup> and/or GFP<sup>+</sup> immune cells suggests that our findings are  
269 not driven by a small population of immune cells that are actively infected or directly  
270 manipulated by parasites.

271

272 **The macrophage phenotype switches over time during type II and type III**  
273 **infection**

274

275 Our finding that type III infection provokes a stronger pro-inflammatory response  
276 at 21 dpi was unexpected because of the prior work showing that macrophages infected  
277 with type III parasites are polarized to M2s while macrophages infected with type II  
278 parasites are polarized to M1s (21,46). As our work was done *in vivo* at 21 dpi and the  
279 prior work was done *in vitro* or very early *in vivo* (1-3 dpi), one explanation for these  
280 discrepancies is that the *in vivo* immune response evolves over time. To test this  
281 possibility and as we had found that splenocytes were accurate predictors of the CNS  
282 immune response, we phenotyped splenocytes from infected mice at 5, 10, and 21 dpi.

283

284 At 5 dpi, we observed that type III-infected mice had an approximately 3-fold  
285 higher frequency and 2-fold higher number of splenic M2s as compared to type II-  
286 infected mice (**Fig. 5A**). Conversely, at this time point, type II-infected mice showed an  
287 increased frequency and 1.5-fold higher number of splenic M1s as compared to type III-  
288 infected mice (**Fig. 5B**). By 10 dpi, the macrophage compartment from both type II and  
289 type III-infected mice had expanded and no difference in macrophage polarization state  
290 was seen (**Fig. 5C-F**). By 21 dpi, the splenic macrophage compartment was contracting  
291 and now type III-infected mice had fewer splenic M2s both by absolute number and  
292 frequency compared to type II-infected mice (**Fig. 5C,D**). At 5 and 10 dpi, for  
293 macrophages from type II or type III-infected mice, we found 1% or less of the  
294 macrophage population was infected or injected with parasite protein (i.e.  $\leq 1\%$  of the  
295 macrophage population was mCherry<sup>+</sup> and/or GFP<sup>+</sup>). We found no strain-specific  
296 differences in the Tregs response at 5 or 10 dpi (**Fig. 5G,H**).

297

298           These data show that early in infection type III-infected mice show a stronger M2  
299 macrophage response than type II-infected mice. However, as the infection progresses,  
300 the immune response evolves such that by 21 dpi type III-infected mice now have a  
301 significant decrease in these anti-inflammatory macrophages compared to type II-  
302 infected mice, even though parasite dissemination to the CNS is equivalent (**Fig. 2**).  
303 Unlike the macrophage response, we did not observe strain-specific differences in  
304 Tregs until 21 dpi. Our data also show that these strain-specific differences are primarily  
305 found in uninfected macrophages.

306

### 307 ***ROP16<sup>III</sup>* affects the type III CNS immune response and parasite persistence**

308

309           Given the evolution of these strain-specific differences from 5 to 21 dpi, we  
310 hypothesized that the early macrophage immune response might heavily influence the  
311 ensuing sub-acute immune response. We focused on the early macrophage response  
312 for several reasons. Tissue resident macrophages are some of the first cells to interface  
313 and respond to infecting microbes (47). Consistent with this concept, at 5 dpi, we found  
314 strain-specific differences in the macrophage compartment but not the T cell  
315 compartment (**Fig. 5A-H**). Furthermore, a growing body of literature suggests that this  
316 early response influences the ensuing T cell response, possibly through the secretion of  
317 cytokines (48). Finally, as noted above, prior *in vitro* and *in vivo* work has already  
318 established that macrophages infected with type II parasites polarize to M1s while  
319 macrophage infected with type III parasites polarize to M2s. Importantly, these studies  
320 also determined that specific alleles of *Toxoplasma* effector proteins (GRA15<sub>II</sub> for M1s

321 and ROP16<sub>III</sub> for M2s) drive these macrophage phenotypes (19,21,22), giving us a  
322 mechanism for altering these responses. Thus, to determine if early macrophage  
323 responses influence the subsequent CNS immune response, we used CRISPR/Cas9  
324 (49–53) to engineer a type III strain that lacked *rop16* (**Fig. S5A**). We validated the  
325 deletion of *rop16* (*IIIΔrop16*) using locus-specific PCR (**Fig. S5B**) and a functional assay  
326 to show that these parasites no longer induced host cell phosphorylation of STAT6 (**Fig.**  
327 **S5C**), the transcription factor linked to the *rop16*<sub>III</sub>-associated M2 phenotype (19). Given  
328 that this strain should lack the early type III-associated M2 response, we predicted that  
329 it would provoke a more type II-like sub-acute CNS immune response. To test this  
330 prediction, we infected mice with type II, type III, or *IIIΔrop16* parasites and, at 21 dpi,  
331 analyzed the CNS immune response by IHC and flow cytometry. Consistent with our  
332 hypothesis, by quantitative IHC, we found that the CNS immune response in *IIIΔrop16*-  
333 infected mice looked akin to type II-infected mice with fewer infiltrating  
334 macrophages/microglia and T cells compared to type III-infected mice (**Fig. 6A-E**). By  
335 flow cytometry, *IIIΔrop16*-infected mice again looked similar to type II-infected mice in  
336 terms of M2s frequency and absolute number (**Fig. 7A,B**). The frequency and the  
337 absolute number of M1s were not statistically different between type II, type III, or  
338 *IIIΔrop16*-infected mice (**Fig. 7C,D**). Unexpectedly, by both *Toxoplasma*-specific qPCR  
339 and cyst count, the *IIIΔrop16*-infected mice showed a substantial decrease in the CNS  
340 parasite burden compared to type II or type III-infected mice (**Fig. 8A,B**).

341

342 To verify that the lack of *rop16*<sub>III</sub> drove the immune response and parasite burden  
343 changes we identified, we generated a *IIIΔrop16::ROP16*<sub>III</sub> strain that ectopically

344 expresses *rop16<sup>III</sup>*. We validated the expression of *rop16<sup>III</sup>* using gene-specific PCR and  
345 a functional assay to confirm parasite-induced host cell phosphorylation of STAT6 (**Fig.**  
346 **S5A-C**). We then infected mice with type III, III $\Delta$ *rop16*, or III $\Delta$ *rop16::ROP16<sup>III</sup>* parasites  
347 and analyzed the CNS immune response by quantitative IHC and flow cytometry. The  
348 III $\Delta$ *rop16::ROP16<sup>III</sup>* strain produced a CNS immune response akin to the parental type  
349 III strain, and distinct from the III $\Delta$ *rop16*, in terms of macrophage and T cell numbers  
350 (**Fig. 9A,B**), parasite burden (**Fig. 9C,D**), and M2 number and frequency (**Fig. 9E**). The  
351 M1 number and frequency was not different between the three strains (**Fig. 9F**).

352

353 In summary, these data highly suggest that, in the context of a type III infection,  
354 *rop16<sup>III</sup>* influences the CNS immune response and enables parasite persistence.

355

### 356 **A lack of *rop16<sup>III</sup>* induces a mixed inflammatory response during acute infection**

357

358 To confirm that the changes in the CNS were downstream of a change in the  
359 acute inflammatory response, at 5 dpi we phenotyped splenocytes from mice infected  
360 with type II, type III, or III $\Delta$ *rop16* parasites. Unexpectedly, mice infected with the  
361 III $\Delta$ *rop16* strain showed a mixed immune phenotype with an increase in both M2s and  
362 M1s (**Fig. 10A,B**). In addition, and unlike either type II or type III-infected mice,  
363 III $\Delta$ *rop16*-infected mice showed an increase in the number and frequency of Tregs (**Fig.**  
364 **10C**) as well as a 3-fold increase in the number of IFN- $\gamma$ <sup>+</sup> CD4 and CD8 T cells (**Fig.**  
365 **10D,E**). Using the mean fluorescence intensity of IFN- $\gamma$  staining to assess IFN- $\gamma$   
366 production per cell, we found that T cells from III $\Delta$ *rop16* and type II-infected mice



367 produced similar amounts of IFN- $\gamma$ , which was 1.5-fold higher than T cells from type III-  
368 infected mice (**Fig. 10D,E**).

369

370 To verify that these acute peripheral immune response changes were driven by  
371 *rop16<sub>III</sub>*, we infected mice with the type III, III $\Delta$ *rop16*, or III $\Delta$ *rop16::ROP16<sub>III</sub>* parasites  
372 and phenotyped the splenocytes at 5 dpi. As expected the III $\Delta$ *rop16::ROP16<sub>III</sub>* strain  
373 produced a splenocyte immune response akin to the parental type III strain in terms of  
374 M2s, M1s, and Treg frequency and absolute number (**Fig. 11A-C**). In the IFN- $\gamma$ <sup>+</sup> CD4  
375 and CD8 compartment, the III $\Delta$ *rop16::ROP16<sub>III</sub>* strain also produced a parental type III  
376 response in terms of absolute numbers of CD4 and CD8 IFN- $\gamma$ <sup>+</sup> cells and the level of  
377 IFN- $\gamma$  produced per cell (**Fig. 11D,E**).

378

379 In summary, these data show that type III parasites lacking *rop16* produce a  
380 mixed inflammatory phenotype at 5 dpi, suggesting that *rop16<sub>III</sub>* is an important  
381 determinant of the acute immune response to type III parasites.

382

383 **Type III parasites depend upon *rop16* to avoid early clearance by Immunity-**

384 **Related GTPases (IRGs)**

385

386 Given this unanticipated acute inflammatory response including the elevated  
387 level of T cell IFN- $\gamma$  production, and decreased CNS parasite burden at 21 dpi, we  
388 hypothesized that the III $\Delta$ *rop16* parasites were undergoing an increased level of early  
389 clearance. This heightened early inflammatory response and the rapid clearance of

390 parasites would then provoke a strong counterbalancing anti-inflammatory response,  
391 causing an increase in both M2s and Tregs early in infection. This hypothesis is  
392 particularly appealing because type III strains have a very low expression of the virulent  
393 allele of *rop18*, a parasite virulence gene that disables the interferon- $\gamma$ -inducible  
394 Immunity-Related GTPase system (IRGs) which is a major mechanism by which murine  
395 host cells kill intracellular parasites in an IFN- $\gamma$  dependent manner (25,26,54). To test  
396 this possibility, we quantified the frequency of infected peritoneal exudate cells (PECs)  
397 at 1, 3, and 5 dpi from mice infected with type II, type III, or III $\Delta$ *rop16* parasites. At 1 and  
398 3 dpi, all 3 strains showed the same frequency of infected PECs. But, by 5 dpi,  
399 III $\Delta$ *rop16*-infected mice showed a 4-6-fold lower rate of infected PECs compared to type  
400 II or parental type III-infected mice (**Fig. 12A-C**). To confirm that this increase in  
401 parasite clearance was secondary to a lack of *rop16<sub>III</sub>*, we infected mice with type III,  
402 III $\Delta$ *rop16*, or III $\Delta$ *rop16::ROP16<sub>III</sub>* parasites and assayed the frequency of infected PECs  
403 at 3 and 5 dpi. As expected, the III $\Delta$ *rop16::ROP16<sub>III</sub>* strain maintained parental levels of  
404 infected PECs at both time points (**Fig. 12D**).

405

406 Finally, to directly test if the IRGs were the mechanism by which the III $\Delta$ *rop16*  
407 parasites were being cleared, we assayed the frequency of infected PECs at 3 and 5  
408 dpi in mice that lack both *Irgm1* and *Irgm3*, key mediators of IRG pathway (27,55–58).  
409 We reasoned that if the IRGs mediated the *rop16<sub>III</sub>*-dependent increase in clearance,  
410 then in *Irgm1/3* KO mice, the III $\Delta$ *rop16* strain should now maintain parental levels of  
411 PECs infection at 5dpi, which is what we found (**Fig. 12E**).

412

413 Collectively, these data suggest that, in the context of a type III infection, *rop16<sup>III</sup>*  
414 is essential to dampen the acute IFN- $\gamma$  response thereby avoiding rapid parasite  
415 clearance by the IRGs.

416

## 417 **Discussion**

418

419 The results presented here show that genetically distinct *Toxoplasma gondii* strains  
420 provoke strain-specific CNS immune responses and that these sub-acute immune  
421 responses are likely influenced by the initial systemic immune response. We have  
422 shown that, compared to infection with a type II strain, infection with a type III strain  
423 induces a more pro-inflammatory, sub-acute CNS immune response in both quality and  
424 quantity at the level of infiltrating T cells and macrophages/microglia, and that these  
425 strain-specific immune responses are not simply driven by differences in parasite  
426 burden. In addition, we have shown that, for the parameters monitored at 21 dpi, the  
427 CNS immune response mirrors the systemic immune response as gauged by  
428 splenocytes. By temporally profiling the systemic macrophage response, we have  
429 shown that this response evolves over time, leading us to hypothesize that the early  
430 macrophage response affects the subsequent sub-acute response. This hypothesis is  
431 partially supported by our finding that a III $\Delta$ *rop16* strain, which induces an early immune  
432 response distinct from the parental type III strain, produces a type II-like CNS immune  
433 response in quantity and quality, despite having a much lower CNS parasite burden  
434 than either the type II or parental type III strain.

435

436           Based upon these data and prior work, we propose the following model: early in  
437 infection, type II-infected macrophages are polarized to M1s which secrete high levels  
438 of IL-12 (21,22). This secreted IL-12 then influences the uninfected macrophages to  
439 polarize towards M1s, resulting in a systemic, highly pro-inflammatory early M1  
440 responses (5 dpi), with high levels of IL-12 and IFN- $\gamma$  production (**Fig S4**). This early  
441 pro-inflammatory response then provokes a counter-balancing anti-inflammatory  
442 response that leads to a rise in M2s, which continues as parasites disseminate and  
443 enter the brain. This systemic response is then recapitulated in the CNS as parasites  
444 establish a chronic CNS infection (**Fig. 13A**). Conversely, for type III parasites, during  
445 acute infection, type III-infected macrophages are polarized to M2s via *rop16<sup>III</sup>* leading  
446 to increased IL-4 production (**Fig S4**), which promotes a mixed systemic inflammatory  
447 response with more early M2s, resulting in decreased levels of IFN- $\gamma$  and IL-12 and  
448 increased levels of IL-4 (**Fig S4**) compared to type II-infected mice. This less pro-  
449 inflammatory early response enables type III parasites to evade early clearance and  
450 avoids provoking the compensatory anti-inflammatory response, so as type III parasites  
451 disseminate to the CNS, the immune response that occurs is now strongly pro-  
452 inflammatory (**Fig. 13B**).

453

454           While these models fit our data, many unanswered questions remain. What are  
455 the molecular and cellular mechanisms by which these early immune responses  
456 influence the later responses? How does the type II *gra15* allele, which drives an M1  
457 phenotype in infected macrophages, influence the systemic immune response to type II  
458 strains? Do these differences persist even in highly established chronic infections (e.g.

459 months to years post infection)? Though these strain-specific immune responses do not  
460 appear to be driven by gross differences in systemic dissemination or CNS parasite  
461 burden, could strain-specific rates of switching from tachyzoites to bradyzoites play a  
462 role in driving immune response differences? We believe we have established a system  
463 in which these highly complex host-parasite interactions can systematically be dissected  
464 using engineered parasites and mice.

465

466 In addition to establishing a tractable model for understanding the evolution of  
467 immune responses, several other important points arise from our data. We potentially  
468 identified a reason for the retention of the type I/III *rop16<sub>III</sub>* (*rop16<sub>III</sub>*) allele. In the  
469 original type II x III cross, *rop16* was not identified as a virulence gene but rather its  
470 strain specificity was detected through strain-specific differences in host cell signaling in  
471 human fibroblasts (59). In fact, in a highly lethal type I strain, at 72 hours post infection,  
472 the loss of *rop16* increased the PECs infection rate, systemic dissemination, and  
473 parasite burden in distal organs while also increasing IL-12 production by PECs. These  
474 data suggest that the increase in IL-12, which should result in higher IFN- $\gamma$  production,  
475 does not adversely affect the  $\Delta$ *rop16* parasites (19). Conversely, we used a type III  
476 strain, which is genetically similar to the type I strain but avirulent in mice because of its'  
477 low expression of *rop18*, a key protein for blocking murine IFN- $\gamma$ -dependent cell intrinsic  
478 defenses (25,26,54). In the context of low *rop18* expression and therefore high  
479 susceptibility to the IRGs, the ability of *rop16<sub>III</sub>* to decrease the early IFN- $\gamma$  response  
480 (**Fig. 10E**) by decreasing IL-12 and increasing the M2 response, appears crucial for  
481 type III strains to avoid rapid clearance during the very earliest part of infection. This

482 proposed mechanism is supported by the data in the *Irgm1/3* knockout mice (**Fig. 12**)  
483 as well as prior work showing that IRG-mediated clearance of intracellular parasites is a  
484 major murine IFN- $\gamma$ -dependent mechanism for controlling *Toxoplasma* (25,26,54).  
485 Collectively, these data suggest that, *in vivo*, *rop16<sub>I/III</sub>* is dispensable for type I strains  
486 but essential for type III strains, a discrepancy potentially explained by differences in  
487 *rop18* expression.

488

489 We have also shown that the strain-specific polarizations previously identified in  
490 infected macrophages (21) also extends to uninfected macrophages found in the  
491 spleen. Based upon the work of others showing that type II-infected macrophages  
492 secrete more IL-12 while type I/III-infected macrophages secrete less IL-12 and more  
493 IL-4 (19,21,22,60), we speculate that the strain-specific differences in secreted  
494 cytokines from infected immune cells propagates the immune cell polarization  
495 differences to uninfected immune cells (**Fig. 13**).

496

497 Finally, we have shown that the *III $\Delta$ rop16* strain is able to elicit a strong brain immune  
498 response, including infiltration of T cells and likely monocytes, despite having a very low  
499 CNS parasite burden (**Fig. 6-8**). The finding of a much stronger CNS immune response  
500 than parasite burden is consistent with prior work showing that immune cells can and do  
501 infiltrate into the CNS in the setting of a strong systemic immune response without brain  
502 infection or pathology (61). We suggest that our data add to the growing body of  
503 literature that the “immune privileged” status of the CNS is less absolute than previously

504 thought and that we still have much to learn about what governs when and if immune  
505 cells infiltrate into the CNS.

506

## 507 **Materials and methods**

508

### 509 **Ethics statement**

510

511 All mouse studies and breeding were carried out in strict accordance with the Public  
512 Health Service Policy on Human Care and Use of Laboratory Animals. The protocol was  
513 approved by the University of Arizona Institutional Animal Care and Use Committee  
514 (#A-3248-01, protocol #12-391).

515

### 516 **Parasite maintenance**

517

518 All parasite strains were maintained through serial passage in human foreskin fibroblast  
519 (gift of John Boothroyd, Stanford University, Stanford, CA) using DMEM, supplemented  
520 with 10% fetal bovine serum, 2mM glutagro, and 100 I.U/ml penicillin and 100 µg/ml  
521 streptomycin. Unless otherwise mentioned, previously described type II (Pruginaud) and  
522 type III (CEP) parasites expressing Cre recombinase and mCherry were used (42,44,45).  
523 For experiments with III $\Delta$ *rop16* strains, depending upon the III $\Delta$ *rop16* clone, we used  
524 either the previously mentioned strains or Pru $\Delta$ *hpt* and CEP $\Delta$ *hpt* strains in which the  
525 endogenous gene for hypoxanthine xanthine guanine phosphoribosyl transferase (HPT)  
526 (gift of John Boothroyd) has been deleted.

527

## 528 **Mice**

529

530 Unless otherwise specified, the mice used in this study are Cre-reporter mice that only  
531 express a green fluorescent protein (GFP) after the cells have undergone Cre-mediated  
532 recombination (43). Mice were purchased from Jackson Laboratories (stock # 007906)  
533 and bred in the University of Arizona Animal Center. We used these mice in  
534 combination with our Cre-secreting parasites as a way to identify the immune cells that  
535 had been injected with parasite rhoptry proteins (42). In addition, breeding pairs of mice  
536 lacking *Irgm1* and *Irgm3* were provided to us courtesy of Greg Taylor (Duke University,  
537 Durham, NC) and subsequently bred in the University of Arizona Animal Center. Mice  
538 were inoculated intraperitoneally with 10,000 freshly syringe-lysed parasites diluted in  
539 200  $\mu$ l of UPS grade PBS.

540

## 541 **Tissue preparation for histology and protein/DNA extraction**

542

543 At appropriate times post infection, mice were anesthetized with a ketamine (24 mg/ml)  
544 and xylazine (4.8 mg/ml) cocktail and transcardially perfused with ice cold phosphate  
545 buffered saline. As previously described, after harvesting organs, the left half of the  
546 mouse brain was fixed in 4% paraformaldehyde in phosphate buffer, kept at 4°C  
547 overnight, rinsed in PBS, and then was embedded in 30% sucrose (42,45). Post fixation  
548 and sucrose embedding, the brain was sectioned into 40  $\mu$ m thick sagittal sections  
549 using a freezing sliding microtome (Microm HM 430). Sections were stored as free-



550 floating sections in cryoprotective media (0.05 M sodium phosphate buffer containing  
551 30% glycerol and 30% ethylene glycol) until stained and mounted on slides. The right  
552 half of the brain was sectioned coronally into 2 halves and stored in separate tubes.  
553 These tubes were flash frozen and stored at -80°C until used for protein or DNA  
554 extraction.

555

## 556 **Immunohistochemistry**

557

558 As described previously, free-floating tissue sections were stained using a standard  
559 protocol (62). Brain sections were stained using the following primary antibodies:  
560 polyclonal rabbit anti-Iba-1 (019-19741, Wako Pure Chemical Industries, Ltd., (1:3000);  
561 monoclonal hamster anti-mouse CD3ε 500A2 (550277, BD Pharmingen™, (1:300).  
562 Following incubation with primary antibody, sections were incubated in appropriate  
563 secondary antibodies: biotinylated goat anti-rabbit (BA-1000, Vector Laboratories  
564 (1:500) and biotinylated goat anti-hamster (BA-9100, Vector Laboratories, (1:500). Next,  
565 sections were incubated in ABC (32020, Thermo Fisher) for 1 hr followed by 3,3'-  
566 Diaminobenzidine (DAB) (SK-4100, Vector Laboratories) detection of biotinylated  
567 antibodies.

568

## 569 **Immune cell quantification**

570

571 Brain sections stained for anti-CD3 or anti-Iba-1 antibody and detected using DAB were  
572 analyzed using light microscopy. For each brain section, twelve fields of view (FOV)

573 throughout the cortex region of the brain beginning with the rostral region and moving  
574 caudally were sampled in a stereotyped way and as previously described (35,62). The  
575 number of CD3 $\epsilon$  cells/FOV was quantified using SimplePCI software (Hamamatsu,  
576 Sewickley, PA) on an Olympus IMT-2 inverted light microscope (35). The number of  
577 Iba-1 $^{+}$  cells/FOV was quantified by manually counting cells with FIJI software (63).  
578 These analyses was performed on 3 brain sections per mouse, after which the resulting  
579 numbers were then averaged to obtain the average number of Iba1 $^{+}$  or CD3 $^{+}$  immune  
580 cells/brain section/mouse. Investigators quantifying CD3 $^{+}$  and Iba-1 $^{+}$  cells were blinded  
581 to the infection status of the mouse until after the data were collected.

582

### 583 **Protein Extraction, Quantification and Multiplex LUMINEX Assay**

584

585 The caudal quarter of the flash frozen brain tissue was homogenized in  
586 radioimmunoprecipitation assay buffer (1% Triton-X, 0.1% SDS, 1X PBS) and 1%  
587 phosphatase inhibitor cocktail (P5726-1ML, Sigma-Aldrich) and 1% protease inhibitor  
588 cocktail (P8340-1ML, Sigma-Aldrich). As previously described, the samples were  
589 sonicated on ice in 3s bursts until homogenized and then were centrifuged at 4°C (62).  
590 The protein concentration of each sample was measured using Direct Detect<sup>®</sup> Infrared  
591 Spectrometer. Each sample was stored at -80°C until the LUMINEX<sup>®</sup> assay was  
592 performed. Cytokines and chemokines were assessed using the MILLIPLEX-MAP-  
593 Mouse-Cytokine/Chemokine-Magnetic-Bead-Panel (MCYTOMAG-70K, EMD Millipore).  
594 This multiplex panel allows the detection of 25 different cytokines/chemokines and  
595 includes individual quality controls for each cytokine/chemokine. The samples were

596 plated as duplicates and the plate was analyzed using a LUMINEX MAGPIX xPONENT  
597 1.2 System which uses Milliplex Analyst software and Luminex® technology to detect  
598 individual cytokine/chemokine quantities.

599

## 600 **Quantitative real time PCR**

601

602 For quantification of parasite burden, genomic DNA from the rostral quarter of the  
603 frozen brain was isolated using DNeasy Blood and Tissue kit (69504, Qiagen) and  
604 following the manufacturer's protocol. The *Toxoplasma* specific, highly conserved 35-  
605 repeat B1 gene was amplified using SYBR Green fluorescence detection with the  
606 Eppendorf Mastercycler ep realplex 2.2 system using primers listed in **Table S3**.  
607 GAPDH was used as house-keeping gene to normalize parasite DNA levels. Results  
608 were calculated as previously described (35,62). For quantification of Arg-1, IL-4, and  
609 IL-12, total RNA from sorted M1 and M2 cells was extracted with TRIzol™ (Life  
610 Technologies, Grand Island, NY) and according to the manufacturer's instructions. First  
611 strand cDNA synthesis was performed using a High-Capacity cDNA Reverse  
612 Transcription kit (4368814, ThermoFisher) and following the manufacturer's instructions.  
613 Arg-1, IL-4, and IL-12 were amplified using SYBR Green fluorescence detection with the  
614 Eppendorf Mastercycler ep realplex 2.2 system using the primers are listed in **Table S3**  
615 (21,22,41). GAPDH was used as the house-keeping gene for normalization. The  
616 reaction condition were as follows: 2 min at 50°C, 2 min at 90°C, followed by 40 cycles  
617 of 15 sec at 95°C, 15 sec at 58°C, and 1 min at 72°C, followed by a melting curve  
618 analysis.

619

## 620 **Cyst counts**

621

622 Sagittal brain sections were washed and blocked in 3% Goat Serum in 0.3% TritonX-  
623 100/TBS for 1 hr. Sections were then incubated with biotinylated Dolichos biflorus  
624 agglutinin (DBA) (Vector Laboratories 1031, 1:500), which binds to the cyst wall (64–  
625 66). The following secondary was used: 405 Streptavidin (Invitrogen, 1:2000). Sections  
626 were mounted as previously described (35). The number of cysts were enumerated  
627 using a standard epifluorescent microscope (EVOS microscope). Only objects that  
628 expressed mCherry and stained for DBA were quantified as cysts.

629

## 630 **Flow Cytometry**

631

632 At appropriate times post infection, mice were euthanized by CO<sub>2</sub> and intracardially  
633 perfused with 20 mL ice-cold PBS, after which spleens and brains were harvested.  
634 These tissues were then made into single cell suspensions. For brains, mononuclear  
635 cells were isolated by mincing the tissue and then passing it serially through an 18-  
636 gauge needle and then a 22-gauge needle in complete RPMI (86% RPMI, 10% FBS,  
637 1% penicillin/streptomycin, 1% L-glutamine, 1% NEAA, 1% sodium pyruvate and  
638 <0.01% β-mercaptoethanol) as described previously (67). After syringe passage, the  
639 cell suspension was passed through a 70 μm strainer and mononuclear cells were  
640 isolated using a density gradient that consisted of a 60% Percoll solution in cRPMI  
641 overlaid with a 30% Percoll solution in PBS. Brain mononuclear cells were isolated

642 from the interphase. Splens were made into single cell suspension and passed  
643 through a 40 µm strainer (68). Red blood cells were lysed by using ammonium chloride-  
644 potassium carbonate (ACK) lysis buffer. The total numbers of viable cells from brain and  
645 spleen suspensions were determined by trypan blue exclusion and counting on a  
646 hemocytometer. Brain and spleen samples were split in order to stain with either the T  
647 cell panel or the macrophage panel. Brain and spleen single cell suspension had Fc  
648 receptors blocked with 2.4G2 to prevent non-specific staining. The following directly  
649 conjugated antibodies were utilized for flow cytometry analysis of T cells: CD3 APC  
650 eFluor® 780 (clone 17A2; eBioscience, 47-0032-80), CD8a PerCP-Cy 5.5 (clone 53-6.7;  
651 eBioscience, 45-0081-82), CD4 PE/Cy7 (clone GK1.5; BioLegend, 100422), CD44 Alexa  
652 Fluor® 700 (clone IM7; eBioscience, 12-0441-82), CD279 (PD-1) eFluor® 450 (clone  
653 J43; eBioscience, 48-9985-82) were used to incubate cells for 30 min protected from  
654 light. The following directly conjugated antibodies were utilized for flow cytometry  
655 analysis of macrophages/microglia: CD45 PerCP-Cy5.5 (clone 30-F11; eBioscience,  
656 45-0451), F4/80 Alexa Fluor® 700 (clone BM8; BioLegend, 123130), CD11b Pacific  
657 Blue™ (clone M1/70; BioLegend, 101224), CD11c PE/Cy7 (clone N418; BioLegend,  
658 117318), CD11c FITC (clone N418; eBioScience, 11-0114-85), CD183 (CXCR3)  
659 phycoerythrin (PE) (clone CXCR3-173; BioLegend, 126505), CD183 (CXCR3) PE/Cy7  
660 (clone CXCR3-173; BioLegend, 126516), CD206 (MMR) phycoerythrin (PE) (clone  
661 C068C2; BioLegend, 141706), CD80 APC (clone 16-10A1; eBioscience 17-0801-82),  
662 CD80 PE/Cy5 (clone 16-10A1; BioLegend, 104712), CD86 APC (clone GL-1;  
663 BioLegend, 105012), CD86 PE/Cy5 (clone GL-1; BioLegend, 105016), Ly-6G/Ly-6C  
664 (Gr-1) PE/Cy5 (clone RB6-8C5; BioLegend, 108410). Cells were incubated with

665 appropriate antibodies for 30 min, while being protected from light. After surface  
666 staining, cells were then stained with live/dead Fixable Yellow Dead Cell Stain Kit (Life  
667 Technologies, L34959) for 30 min to distinguish between live and dead cells. For  
668 intracellular cytokine staining, while protected from light, samples were washed,  
669 permeabilized, and fixed using a permeabilization and fixation kit (eBioscience, 00-  
670 5223-56; 00-5123-43; 00-8333-56). An intracellular staining protocol was used to stain  
671 for FoxP3 PE (clone FJK-16s; eBioscience, 12-5773-82), and IFN- $\gamma$  APC (clone  
672 XMG1.2; eBioscience 17-7311-82) for 30 min. Samples were washed after each  
673 staining step to remove residual unbound antibody. A BD LSR II (BD Biosciences, San  
674 Jose, CA; University of Arizona Cancer Center) was used to run the samples and  
675 Flowjo (Treestar) was used for all flow cytometry analysis.

676  
677 For sorting, splenocytes were isolated as described above and stained with the  
678 macrophage panel followed by the live/dead staining as denoted above. Samples were  
679 washed and resuspended in PBS until sorted, which was done on the same day as  
680 isolation. A FACS Aria III (BD Biosciences, San Jose, CA; University of Arizona Cancer  
681 Center) was used to sort M1 and M2 populations. After sorting, samples were  
682 resuspended in TRIzol™ (Life Technologies, Grand Island, NY) and stored at -80°C  
683 until RNA extraction.

684

## 685 **Plasmid construction**

686

687 All the plasmids and primers used to make and validate the III $\Delta$ *rop16* strain are listed in  
688 **Table S3**. The *rop16*-targeting CRISPR plasmids (sg *rop16*Up and sg *rop16*Down) were  
689 constructed from sgUPRT using a previously described Q5 mutagenesis protocol (51–  
690 53). To generate a plasmid for inserting *hxgprt* into the *rop16* locus, upstream (500-bp)  
691 and downstream (500-bp) regions directly adjacent to the sgROP16Up and sg  
692 *rop16*Down target sequence were used to flank *hxgprt* via sequential restriction cloning.

693

#### 694 **Generation of III $\Delta$ *rop16* knockout and III $\Delta$ *rop16*::*ROP16*<sub>III</sub>**

695

696 To disrupt *rop16* in type III $\Delta$ *hpt*, we transfected parasites with 3 plasmids: the sg  
697 *rop16*Up CRISPR and sg *rop16*Down CRISPR plasmids and the pTKO (69) plasmid  
698 containing *rop16* homology regions surrounding a selectable marker (*hxgprt*) or with the  
699 toxofilin-Cre cassette (44) (**Fig. S5**). Selection by growth for 4 to 8 days in 25 mg/ml  
700 mycophenolic acid and 50 mg/ml xanthine (70) was used to obtain stably resistant  
701 clones with *hxgprt* integration. These clones were subsequently screened by PCR to  
702 confirm disruption of the *rop16* locus (**Fig. S5**). Clones negative for *rop16* and positive  
703 for integration of *hxgprt* were confirmed by western blot to have lost the *rop16*-  
704 dependent phosphorylation of STAT6 (59). In addition, clones with the toxofilin-Cre  
705 cassette were confirmed to trigger Cre-mediated recombination as previously described  
706 (44).

707

708 To complement *rop16*, III $\Delta$ *rop16* parasites were transfected with 50  $\mu$ gs of linearized  
709 plasmid DNA harboring a FLAG-tagged *ROP16*<sub>III</sub> gene and a bleomycin resistance

710 marker. Post transfection freshly egressed parasites were resuspended in DMEM  
711 supplemented with 50 µg/mL of Zeocin (InvivoGEN, 11006-33-0) for 4 hour and then  
712 added to HFF monolayers supplemented with 5µg/mL Zeocin to select for integrants.  
713 This process was repeated 3 times prior to plating by limiting dilution to isolate single  
714 clones. Single clones were subsequently screened by PCR for *rop16* integration (**Fig.**  
715 **S5**). The  $III\Delta rop16::ROP16_{III}$  clones were all derived from the  $III\Delta rop16$  strain that  
716 expresses toxofilin-Cre.

717

### 718 **Peritoneal Exudate Cells Isolation**

719

720 Cre-reporter mice or *Irgm1/3* knockout mice were infected with type II, type III,  
721  $III\Delta rop16$ , or  $III\Delta rop16::ROP16_{III}$ . At appropriate times, peritoneal exudate cells (PECs)  
722 were collected by peritoneal lavage with 10 ml of cold 1 x PBS. PECs were incubated in  
723 FcBlock for 10 min as described above. PECs were subsequently stained with CD45  
724 marker, followed by with live/dead staining as described above, and then analyzed  
725 using a BD LSR II (BD Biosciences, San Jose, CA; University of Arizona Cancer  
726 Center) (42).

727

### 728 **Statistical analysis**

729

730 Statistical analyses were performed using Prism 7.0 software. To improve distributional  
731 characteristics, total numbers of CD3 and Iba-1 cells were log transformed prior to  
732 analysis. Unless otherwise specified, two-way analysis of variance (ANOVA) with



733 Fisher's protected LSD was used, with the cohort as the block factor and parasite strain  
734 as the experimental factor. For cytokine levels, the data were analyzed using a one-way  
735 ANOVA with Bonferroni's post-hoc test.

736

## 737 **Acknowledgements**

738

739 The authors would like to thank all members of the Koshy Lab for helpful discussions  
740 and critical review of the manuscript. We would like to thank Dean Billheimer (Director  
741 of BIO5 Statistical Consulting Group) for his suggestions for data analyses. We would  
742 also like to thank the Doyle Lab, especially Vivian Nguyen for the use of their Luminex®  
743 MAGPIX for the cytokine assays. Finally, we would like to thank Greg Taylor (Duke  
744 University), for providing us with breeding pairs for the *Irgm1/3* knockout mice.  
745 Research in this manuscript was directly supported by the UA Flow Cytometry Shared  
746 Resource funded by the National Cancer Institute (P30CA023074).

747

## 748 **REFERENCES**

- 749 1. Suzuki Y. Immunopathogenesis of Cerebral Toxoplasmosis. *J Infect Dis.* 2002 Dec  
750 1;186:S234–40.
- 751 2. Carruthers VB. Host cell invasion by the opportunistic pathogen *Toxoplasma*  
752 *gondii*. *Acta Trop.* 2002 Feb;81(2):111–22.
- 753 3. Hill D, Dubey JP. *Toxoplasma gondii*: transmission, diagnosis and prevention. *Clin*  
754 *Microbiol Infect Off Publ Eur Soc Clin Microbiol Infect Dis.* 2002 Oct;8(10):634–40.
- 755 4. Wreghitt TG, Gray JJ, Pavel P, Balfour A, Fabbri A, Sharples LD, et al. Efficacy of  
756 pyrimethamine for the prevention of donor-acquired *Toxoplasma gondii* infection in  
757 heart and heart-lung transplant patients. *Transpl Int Off J Eur Soc Organ*  
758 *Transplant.* 1992 Sep;5(4):197–200.

- 759 5. Ruskin J, Remington JS. Toxoplasmosis in the compromised host. *Ann Intern Med.*  
760 1976 Feb;84(2):193–9.
- 761 6. Luft BJ, Remington JS. Toxoplasmic encephalitis in AIDS. *Clin Infect Dis Off Publ*  
762 *Infect Dis Soc Am.* 1992 Aug;15(2):211–22.
- 763 7. Desmots G, Couvreur J. Congenital toxoplasmosis. A prospective study of 378  
764 pregnancies. *N Engl J Med.* 1974 May 16;290(20):1110–6.
- 765 8. Grigg ME, Ganatra J, Boothroyd JC, Margolis TP. Unusual abundance of atypical  
766 strains associated with human ocular toxoplasmosis. *J Infect Dis.* 2001 Sep  
767 1;184(5):633–9.
- 768 9. Kamerkar S, Davis PH. *Toxoplasma on the Brain: Understanding Host-Pathogen*  
769 *Interactions in Chronic CNS Infection.* *J Parasitol Res [Internet].* 2012 [cited 2013  
770 Aug 10];2012. Available from:  
771 <http://www.ncbi.nlm.nih.gov/pmc/articles/PMC3321570/>
- 772 10. Ferreira IMR, Vidal JE, de Mattos C de CB, de Mattos LC, Qu D, Su C, et al.  
773 *Toxoplasma gondii* isolates: multilocus RFLP-PCR genotyping from human  
774 patients in Sao Paulo State, Brazil identified distinct genotypes. *Exp Parasitol.*  
775 2011 Oct;129(2):190–5.
- 776 11. Dubey JP, Lago EG, Gennari SM, Su C, Jones JL. Toxoplasmosis in humans and  
777 animals in Brazil: high prevalence, high burden of disease, and epidemiology.  
778 *Parasitology.* 2012 Sep;139(11):1375–424.
- 779 12. Furtado JM, Winthrop KL, Butler NJ, Smith JR. Ocular toxoplasmosis I:  
780 parasitology, epidemiology and public health. *Clin Experiment Ophthalmol.* 2013  
781 Feb;41(1):82–94.
- 782 13. Remington JS, McLeod R, Wilson CB, Desmots G. CHAPTER 31 -  
783 Toxoplasmosis. In: *Infectious Diseases of the Fetus and Newborn (Seventh*  
784 *Edition) [Internet].* Philadelphia: W.B. Saunders; 2011. p. 918–1041. Available  
785 from: <https://www.sciencedirect.com/science/article/pii/B9781416064008000316>
- 786 14. Boothroyd JC, Grigg ME. Population biology of *Toxoplasma gondii* and its  
787 relevance to human infection: do different strains cause different disease? *Curr*  
788 *Opin Microbiol.* 2002 Aug 1;5(4):438–42.
- 789 15. Sibley LD, Boothroyd JC. Virulent strains of *Toxoplasma gondii* comprise a single  
790 clonal lineage. *Nature.* 1992 Sep 3;359(6390):82–5.
- 791 16. Howe DK, Sibley LD. *Toxoplasma gondii* comprises three clonal lineages:  
792 correlation of parasite genotype with human disease. *J Infect Dis.* 1995  
793 Dec;172(6):1561–6.

- 794 17. Su C, Khan A, Zhou P, Majumdar D, Ajzenberg D, Dardé M-L, et al. Globally  
795 diverse *Toxoplasma gondii* isolates comprise six major clades originating from a  
796 small number of distinct ancestral lineages. *Proc Natl Acad Sci*. 2012 Apr  
797 10;109(15):5844–9.
- 798 18. Saeij JPJ, Boyle JP, Collier S, Taylor S, Sibley LD, Brooke-Powell ET, et al.  
799 Polymorphic secreted kinases are key virulence factors in toxoplasmosis. *Science*.  
800 2006 Dec 15;314(5806):1780–3.
- 801 19. Butcher BA, Fox BA, Rommereim LM, Kim SG, Maurer KJ, Yarovinsky F, et al.  
802 *Toxoplasma gondii* rhoptry kinase ROP16 activates STAT3 and STAT6 resulting in  
803 cytokine inhibition and arginase-1-dependent growth control. *PLoS Pathog*. 2011  
804 Sep;7(9):e1002236.
- 805 20. Rosowski EE, Lu D, Julien L, Rodda L, Gaiser RA, Jensen KDC, et al. Strain-  
806 specific activation of the NF-kappaB pathway by GRA15, a novel *Toxoplasma*  
807 *gondii* dense granule protein. *J Exp Med*. 2011 Jan 17;208(1):195–212.
- 808 21. Jensen KDC, Wang Y, Wojno EDT, Shastri AJ, Hu K, Cornel L, et al. *Toxoplasma*  
809 polymorphic effectors determine macrophage polarization and intestinal  
810 inflammation. *Cell Host Microbe*. 2011 Jun 16;9(6):472–83.
- 811 22. Robben PM, Mordue DG, Truscott SM, Takeda K, Akira S, Sibley LD. Production of  
812 IL-12 by macrophages infected with *Toxoplasma gondii* depends on the parasite  
813 genotype. *J Immunol Baltim Md 1950*. 2004 Mar 15;172(6):3686–94.
- 814 23. Suzuki Y, Conley FK, Remington JS. Differences in virulence and development of  
815 encephalitis during chronic infection vary with the strain of *Toxoplasma gondii*. *J*  
816 *Infect Dis*. 1989 Apr;159(4):790–4.
- 817 24. Suzuki Y, Joh K. Effect of the strain of *Toxoplasma gondii* on the development of  
818 toxoplasmic encephalitis in mice treated with antibody to interferon-gamma.  
819 *Parasitol Res*. 1994;80(2):125–30.
- 820 25. Fentress SJ, Behnke MS, Dunay IR, Mashayekhi M, Rommereim LM, Fox BA, et  
821 al. Phosphorylation of immunity-related GTPases by a *Toxoplasma gondii*-secreted  
822 kinase promotes macrophage survival and virulence. *Cell Host Microbe*. 2010 Dec  
823 16;8(6):484–95.
- 824 26. Niedelman W, Gold DA, Rosowski EE, Sprockholt JK, Lim D, Arenas AF, et al. The  
825 Rhoptry Proteins ROP18 and ROP5 Mediate *Toxoplasma gondii* Evasion of the  
826 Murine, But Not the Human, Interferon-Gamma Response. *PLOS Pathog*. 2012  
827 Jun 28;8(6):e1002784.
- 828 27. Henry SC, Daniell XG, Burroughs AR, Indaram M, Howell DN, Coers J, et al.  
829 Balance of Irgm protein activities determines IFN- $\gamma$ -induced host defense. *J Leukoc*  
830 *Biol*. 2009;85(5):877–85.

- 831 28. Suzuki Y, Orellana MA, Schreiber RD, Remington JS. Interferon-gamma: the major  
832 mediator of resistance against *Toxoplasma gondii*. *Science*. 1988 Apr  
833 22;240(4851):516–8.
- 834 29. Suzuki Y, Conley FK, Remington JS. Treatment of toxoplasmic encephalitis in mice  
835 with recombinant gamma interferon. *Infect Immun*. 1990 Sep 1;58(9):3050–5.
- 836 30. Suzuki Y, Claflin J, Wang X, Lengi A, Kikuchi T. Microglia and macrophages as  
837 innate producers of interferon-gamma in the brain following infection with  
838 *Toxoplasma gondii*. *Int J Parasitol*. 2005 Jan;35(1):83–90.
- 839 31. Sa Q, Ochiai E, Tiwari A, Perkins S, Mullins J, Gehman M, et al. Cutting Edge: IFN-  
840  $\gamma$  Produced by Brain-Resident Cells Is Crucial To Control Cerebral Infection with  
841 *Toxoplasma gondii*. *J Immunol Baltim Md 1950*. 2015 Aug 1;195(3):796–800.
- 842 32. Burg JL, Grover CM, Pouletty P, Boothroyd JC. Direct and sensitive detection of a  
843 pathogenic protozoan, *Toxoplasma gondii*, by polymerase chain reaction. *J Clin*  
844 *Microbiol*. 1989 Aug;27(8):1787–92.
- 845 33. Buchbinder S, Blatz R, Christian Rodloff A. Comparison of real-time PCR detection  
846 methods for B1 and P30 genes of *Toxoplasma gondii*. *Diagn Microbiol Infect Dis*.  
847 2003 Apr;45(4):269–71.
- 848 34. Noor S, Habashy AS, Nance JP, Clark RT, Nemati K, Carson MJ, et al. CCR7-  
849 dependent immunity during acute *Toxoplasma gondii* infection. *Infect Immun*. 2010  
850 May;78(5):2257–63.
- 851 35. Cekanaviciute E, Dietrich HK, Axtell RC, Williams AM, Egusquiza R, Wai KM, et al.  
852 Astrocytic TGF- $\beta$  signaling limits inflammation and reduces neuronal damage  
853 during central nervous system *Toxoplasma* infection. *J Immunol Baltim Md 1950*.  
854 2014 Jul 1;193(1):139–49.
- 855 36. Knoll LJ, Boothroyd JC. Isolation of developmentally regulated genes from  
856 *Toxoplasma gondii* by a gene trap with the positive and negative selectable marker  
857 hypoxanthine-xanthine-guanine phosphoribosyltransferase. *Mol Cell Biol*. 1998  
858 Feb;18(2):807–14.
- 859 37. O'Brien CA, Overall C, Konradt C, O'Hara Hall AC, Hayes NW, Wagage S, et al.  
860 CD11c-Expressing Cells Affect Regulatory T Cell Behavior in the Meninges during  
861 Central Nervous System Infection. *J Immunol Baltim Md 1950*. 2017  
862 15;198(10):4054–61.
- 863 38. Hwang YS, Shin J-H, Yang J-P, Jung B-K, Lee SH, Shin E-H. Characteristics of  
864 Infection Immunity Regulated by *Toxoplasma gondii* to Maintain Chronic Infection  
865 in the Brain. *Front Immunol*. 2018;9:158.

- 866 39. Murray PJ, Allen JE, Biswas SK, Fisher EA, Gilroy DW, Goerdts S, et al.  
867 Macrophage activation and polarization: nomenclature and experimental  
868 guidelines. *Immunity*. 2014 Jul 17;41(1):14–20.
- 869 40. Jin RM, Blair SJ, Warunek J, Heffner RR, Blader IJ, Wohlfert EA. Regulatory T  
870 Cells Promote Myositis and Muscle Damage in *Toxoplasma gondii* Infection. *J*  
871 *Immunol Baltim Md* 1950. 2017 01;198(1):352–62.
- 872 41. Nance JP, Vannella KM, Worth D, David C, Carter D, Noor S, et al. Chitinase  
873 dependent control of protozoan cyst burden in the brain. *PLoS Pathog*.  
874 2012;8(11):e1002990.
- 875 42. Koshy AA, Dietrich HK, Christian DA, Melehani JH, Shastri AJ, Hunter CA, et al.  
876 *Toxoplasma* Co-opts Host Cells It Does Not Invade. *PLoS Pathog*. 2012 Jul  
877 26;8(7):e1002825.
- 878 43. Madisen L, Zwingman TA, Sunkin SM, Oh SW, Zariwala HA, Gu H, et al. A robust  
879 and high-throughput Cre reporting and characterization system for the whole  
880 mouse brain. *Nat Neurosci*. 2010 Jan;13(1):133–40.
- 881 44. Koshy AA, Fouts AE, Lodoen MB, Alkan O, Blau HM, Boothroyd JC. *Toxoplasma*  
882 secreting Cre recombinase for analysis of host-parasite interactions. *Nat Methods*.  
883 2010 Apr;7(4):307–9.
- 884 45. Cabral CM, Tuladhar S, Dietrich HK, Nguyen E, MacDonald WR, Trivedi T, et al.  
885 Neurons are the Primary Target Cell for the Brain-Tropic Intracellular Parasite  
886 *Toxoplasma gondii*. *PLoS Pathog*. 2016 Feb;12(2):e1005447.
- 887 46. Jensen KDC, Hu K, Whitmarsh RJ, Hassan MA, Julien L, Lu D, et al. *Toxoplasma*  
888 *gondii* Rhoptry 16 Kinase Promotes Host Resistance to Oral Infection and Intestinal  
889 Inflammation Only in the Context of the Dense Granule Protein GRA15. *Infect*  
890 *Immun*. 2013 Jun 1;81(6):2156–67.
- 891 47. Xu S, Shinohara ML. Tissue-Resident Macrophages in Fungal Infections. *Front*  
892 *Immunol*. 2017;8:1798.
- 893 48. Roberts CA, Dickinson AK, Taams LS. The Interplay Between  
894 Monocytes/Macrophages and CD4+ T Cell Subsets in Rheumatoid Arthritis. *Front*  
895 *Immunol* [Internet]. 2015 [cited 2019 Mar 3];6. Available from:  
896 <https://www.frontiersin.org/articles/10.3389/fimmu.2015.00571/full>
- 897 49. Mojica FJM, Díez-Villaseñor C, García-Martínez J, Soria E. Intervening Sequences  
898 of Regularly Spaced Prokaryotic Repeats Derive from Foreign Genetic Elements. *J*  
899 *Mol Evol*. 2005 Feb 1;60(2):174–82.
- 900 50. Ran FA, Hsu PD, Wright J, Agarwala V, Scott DA, Zhang F. Genome engineering  
901 using the CRISPR-Cas9 system. *Nat Protoc Lond*. 2013 Nov;8(11):2281–308.

- 902 51. Shen B, Brown KM, Lee TD, Sibley LD. Efficient gene disruption in diverse strains  
903 of *Toxoplasma gondii* using CRISPR/CAS9. *mBio*. 2014 May 13;5(3):e01114-  
904 01114.
- 905 52. Sidik SM, Hackett CG, Tran F, Westwood NJ, Lourido S. Efficient Genome  
906 Engineering of *Toxoplasma gondii* Using CRISPR/Cas9. *PLoS One San Franc*.  
907 2014 Jun;9(6):e100450.
- 908 53. Shen B, Brown K, Long S, Sibley LD. Development of CRISPR/Cas9 for Efficient  
909 Genome Editing in *Toxoplasma gondii*. *Methods Mol Biol Clifton NJ*.  
910 2017;1498:79–103.
- 911 54. Zhao YO, Khaminets A, Hunn JP, Howard JC. Disruption of the *Toxoplasma gondii*  
912 Parasitophorous Vacuole by IFN $\gamma$ -Inducible Immunity-Related GTPases (IRG  
913 Proteins) Triggers Necrotic Cell Death. *PLoS Pathog*. 2009 Feb 6;5(2):e1000288.
- 914 55. Haldar AK, Saka HA, Piro AS, Dunn JD, Henry SC, Taylor GA, et al. IRG and GBP  
915 Host Resistance Factors Target Aberrant, “Non-self” Vacuoles Characterized by  
916 the Missing of “Self” IRGM Proteins. *PLOS Pathog*. 2013 Jun 13;9(6):e1003414.
- 917 56. Coers J, Gondek DC, Olive AJ, Rohlfing A, Taylor GA, Starnbach MN.  
918 Compensatory T Cell Responses in IRG-Deficient Mice Prevent Sustained  
919 *Chlamydia trachomatis* Infections. *PLOS Pathog*. 2011 Jun 23;7(6):e1001346.
- 920 57. Coers J, Bernstein-Hanley I, Grotzky D, Parvanova I, Howard JC, Taylor GA, et al.  
921 *Chlamydia muridarum* Evades Growth Restriction by the IFN- $\gamma$ -Inducible Host  
922 Resistance Factor Irgb10. *J Immunol*. 2008 May 1;180(9):6237–45.
- 923 58. Feng CG, Zheng L, Jankovic D, Báfica A, Cannons JL, Watford WT, et al. The  
924 immunity-related GTPase Irgm1 promotes the expansion of activated CD4<sup>+</sup> T cell  
925 populations by preventing interferon- $\gamma$ -induced cell death. *Nat Immunol*. 2008  
926 Nov;9(11):1279–87.
- 927 59. Saeij JPJ, Collier S, Boyle JP, Jerome ME, White MW, Boothroyd JC. *Toxoplasma*  
928 co-opts host gene expression by injection of a polymorphic kinase homologue.  
929 *Nature*. 2007 Jan 18;445(7125):324–7.
- 930 60. Hunter CA, Sibley LD. Modulation of innate immunity by *Toxoplasma gondii*  
931 virulence effectors. *Nat Rev Microbiol*. 2012 Nov;10(11):766–78.
- 932 61. Hickey WF, Kimura H. Graft-vs.-host disease elicits expression of class I and class  
933 II histocompatibility antigens and the presence of scattered T lymphocytes in rat  
934 central nervous system. *Proc Natl Acad Sci*. 1987 Apr 1;84(7):2082–6.
- 935 62. Cabral CM, McGovern KE, MacDonald WR, Franco J, Koshy AA. Dissecting  
936 Amyloid Beta Deposition Using Distinct Strains of the Neurotropic Parasite  
937 *Toxoplasma gondii* as a Novel Tool. *ASN Neuro*. 2017  
938 Aug;9(4):1759091417724915.

- 939 63. Schindelin J, Arganda-Carreras I, Frise E, Kaynig V, Longair M, Pietzsch T, et al.  
940 Fiji: an open-source platform for biological-image analysis. *Nat Methods*. 2012 Jun  
941 28;9(7):676–82.
- 942 64. Knoll LJ, Boothroyd JC. Isolation of Developmentally Regulated Genes from  
943 *Toxoplasma gondii* by a Gene Trap with the Positive and Negative Selectable  
944 Marker Hypoxanthine-Xanthine-Guanine Phosphoribosyltransferase. *Mol Cell Biol*.  
945 1998 Feb;18(2):807–14.
- 946 65. Fux B, Nawas J, Khan A, Gill DB, Su C, Sibley LD. *Toxoplasma gondii* Strains  
947 Defective in Oral Transmission Are Also Defective in Developmental Stage  
948 Differentiation. *Infect Immun*. 2007 May;75(5):2580–90.
- 949 66. Schaeffer M, Han S-J, Chtanova T, Dooren GG van, Herzmark P, Chen Y, et al.  
950 Dynamic Imaging of T Cell-Parasite Interactions in the Brains of Mice Chronically  
951 Infected with *Toxoplasma gondii*. *J Immunol*. 2009 May 15;182(10):6379–93.
- 952 67. Landrith TA, Sureshchandra S, Rivera A, Jang JC, Rais M, Nair MG, et al. CD103+  
953 CD8 T Cells in the *Toxoplasma*-Infected Brain Exhibit a Tissue-Resident Memory  
954 Transcriptional Profile. *Front Immunol*. 2017;8:335.
- 955 68. Barrigan LM, Tuladhar S, Brunton JC, Woolard MD, Chen C, Saini D, et al.  
956 Infection with *Francisella tularensis* LVS clpB leads to an altered yet protective  
957 immune response. *Infect Immun*. 2013 Jun;81(6):2028–42.
- 958 69. Pernas L, Boothroyd JC. Association of host mitochondria with the parasitophorous  
959 vacuole during *Toxoplasma* infection is not dependent on rhoptry proteins ROP2/8.  
960 *Int J Parasitol*. 2010 Oct;40(12):1367–71.
- 961 70. Donald RG, Roos DS. Insertional mutagenesis and marker rescue in a protozoan  
962 parasite: cloning of the uracil phosphoribosyltransferase locus from *Toxoplasma*  
963 *gondii*. *Proc Natl Acad Sci*. 1995 Jun 6;92(12):5749–53.

964

## 965 **FIGURE LEGENDS**

966

967 **Fig 1. Type III infection provokes a stronger pro-inflammatory CNS immune**  
968 **response compared to type II infection.** Mice were inoculated with saline (control),  
969 type II, or type III parasites and brains were harvested at 21 days post infection (dpi). **A.**  
970 Representative images of Iba-1<sup>+</sup> cells (macrophages/microglia) in brain sections from

971 mice in each group. **B.** Quantification of the number of Iba-1<sup>+</sup> cells. **C.** Representative  
972 images of CD3<sup>+</sup> cells (T cells) in brain sections from type II, and type III-infected mice.  
973 **D.** Enlargement of the boxed area in **C.** **E.** Quantification of the number of CD3<sup>+</sup> cells.  
974 For **B,E.** Bars, mean  $\pm$  SEM. N=12 fields of view/section, 3 sections/mouse, 8  
975 mice/infected group. For each mouse, the number of cells/section was averaged to  
976 create a single point. \*p<0.05, \*\*\*\*p<0.0001, Two-way ANOVA with Fisher's protected  
977 LSD. Data are representative of 3 individual experiments. **F.** The table lists the subset of  
978 cytokines or chemokines from a 25-plex assay that showed a  $\geq 2$ -fold difference  
979 between protein levels in brain homogenates from type II and type III-infected mice.  
980 Table S1 has full list of cytokines/chemokines. N=8 mice/infected group. p-values  
981 determined by one-way ANOVA with Bonferroni post-hoc test.

982

983

984 **Fig 2. Type II and type III-infected mice show similar dissemination pattern and**  
985 **parasite burdens in early and sub-acute CNS infection.** Mice were inoculated with  
986 type II or type III parasites, and brains were harvested at noted time points. **A.**  
987 Quantification of CNS *Toxoplasma* burden at 21 dpi using quantitative PCR (qPCR) for  
988 the *Toxoplasma*-specific B1 gene and host GAPDH gene (housekeeping gene).  
989 *Toxoplasma* and mouse genomic DNA were isolated from brain homogenates. **B.**  
990 Quantification of *Toxoplasma* cyst burden at 21 dpi in brain sections stained with  
991 Dolichos biflorous agglutinin (DBA), which stains the cyst wall. Stained sections were  
992 then analyzed by epifluorescent microscopy to quantify DBA<sup>+</sup> mCherry<sup>+</sup> cysts. For **A,B.**  
993 Bars, mean  $\pm$  SEM. N= 8 mice/infected group. ns= not significant; two-way ANOVA with



994 Fisher's protected LSD. Data representative of 3 individual experiments. **C,D,E,F.**  
995 Quantification of *Toxoplasma* burden was performed as in (A) at specified time points  
996 from spleen, liver, lung, and brain. Bars, mean  $\pm$  SEM. N=4-5 mice/infected group/time  
997 point. No significant differences were found in mean B1 quantification. Two-way ANOVA  
998 with Fisher's protected LSD. Data are representative of 2 individual experiments. ● =  
999 type II, ■ = type III.

1000

1001

1002 **Fig 3. Type III-infected mice have fewer alternatively activated macrophages (M2)**  
1003 **and T regulatory cells (Tregs) in the CNS as compared to type II-infected mice.** At  
1004 21 dpi, immune cells were isolated from the CNS of either type II or type III-infected  
1005 mice, split in half, and then stained for either T cell or macrophage markers. The stained  
1006 cells were then analyzed by flow cytometry. **A,B.** CNS mononuclear cells evaluated for  
1007 the presence of M2 macrophages (CD45<sup>+</sup>, F4/80<sup>+</sup>, CD11b<sup>hi</sup>, CD11c<sup>lo</sup>, MMR<sup>+</sup>/CXCR3<sup>+</sup>).  
1008 **C,D.** CNS mononuclear cells evaluated for the presence of M1 macrophages (CD45<sup>+</sup>,  
1009 F4/80<sup>+</sup>, CD11b<sup>hi</sup>, CD11c<sup>lo</sup>, CD80<sup>+</sup>/CD86<sup>+</sup>). **E,F.** CNS mononuclear cells evaluated for  
1010 the presence of Tregs (CD3<sup>+</sup> CD4<sup>+</sup> FoxP3<sup>+</sup>). Bars, mean  $\pm$  SEM. N= 6 mice/infected  
1011 group. \*p<0.05, \*\*p<0.01, \*\*\*p<0.001, \*\*\*\*p<0.0001, ns= not significant, two-way  
1012 ANOVA with Fisher's protected LSD. Data representative of 2 individual experiments.

1013

1014 **Fig 4. Type III-infected mice have fewer splenic alternatively activated**  
1015 **macrophages (M2) and T regulatory cells (Tregs) compared to type II-infected**  
1016 **mice.** At 21 dpi, immune cells were isolated from the spleen of either type II- or type III-

1017 infected mice and stained and analyzed as in **Fig.3. A,B**. Splenic mononuclear cells  
1018 evaluated for the presence of M2 macrophages. **C,D**. Splenic mononuclear cells  
1019 evaluated for the presence of M1 macrophages. **E,F**. Splenic mononuclear cells  
1020 evaluated for the presence of Tregs. Bars, mean  $\pm$  SEM. N= 6 mice/infected group.  
1021 \* $p < 0.05$ , \*\* $p < 0.01$ , \*\*\* $p < 0.001$ , \*\*\*\* $p < 0.0001$ , ns= not significant, two-way ANOVA with  
1022 Fisher's protected LSD. Data representative of 2 individual experiments.

1023

1024 **Fig 5. Macrophage phenotypes change over time during type II and type III**  
1025 **infection.** At 5, 10, and 21 dpi, immune cells were isolated from the spleen of either  
1026 type II or type III-infected mice and stained and analyzed as in **Fig.3. A,B**.  
1027 Quantification of the frequency and number of M2 (**A**) or M1 (**B**) macrophages at 5 dpi.  
1028 **C,D**. Quantification of the frequency (**C**) and number (**D**) of splenic M2 macrophages  
1029 over time. **E,F**. Quantification of the frequency (**E**) and number (**F**) of splenic M1  
1030 macrophages over time. **G,H**. Quantification of the frequency (**G**) and number (**H**) of  
1031 splenic Tregs over time. Bars, mean  $\pm$  SEM. N= 5-7 mice/infected group. \* $p < 0.05$ ,  
1032 \*\* $p < 0.01$ , two-way ANOVA with Fisher's protected LSD. Data representative of 2  
1033 individual experiments. ● = type II, ■ = type III.

1034

1035 **Fig 6. III $\Delta$ rop16-infected mice show a type II-like CNS response with fewer CNS**  
1036 **macrophages/microglia and T cells.** Mice were inoculated with type II, type III, or  
1037 III $\Delta$ rop16 parasites, and brains harvested at 21 dpi. Macrophages/microglia and T cells  
1038 infiltration into the CNS was determined by quantitative IHC (as in **Fig.1**). **A**.

1039 Representative image of Iba-1<sup>+</sup> cells (macrophage/microglia). **B.** Quantification of the  
1040 number of Iba-1<sup>+</sup> cells. **C.** Representative image of CD3<sup>+</sup> cells (T cell). **D.** Enlargement  
1041 of the boxed area in **(C)**. **E.** Quantification of the number of CD3<sup>+</sup> cells. Bars, mean  $\pm$   
1042 SEM. N= 12 fields of view/section, 3 sections/mouse, 5 mice/infected group. For each  
1043 mouse, the number of cells/section was averaged to create a single point. \*p<0.05, two-  
1044 way ANOVA with Fisher's protected LSD. Data representative of 3 individual  
1045 experiments with two different, individually engineered III $\Delta$ rop16 clones.

1046

1047

1048 **Fig 7. III $\Delta$ rop16 infection provokes more alternatively activated macrophages,**  
1049 **akin to a type II CNS immune response.** At 21 dpi, immune cells were isolated from  
1050 brains infected mice and then stained and analyzed as in **Fig.3. A,B.** CNS mononuclear  
1051 cells evaluated for the presence of M2 macrophages. **C,D.** CNS mononuclear cells  
1052 evaluated for the presence of M1 macrophages. Bars, mean  $\pm$  SEM. N= 4-5  
1053 mice/infected group. \*p<0.05, \*\*p<0.01, \*\*\*p<0.001, two-way ANOVA with Fisher's  
1054 protected LSD. Data representative of 3 individual experiments with two different,  
1055 individually engineered III $\Delta$ rop16 clones.

1056

1057 **Fig 8. III $\Delta$ rop16-infected mice had a significantly lower CNS parasite burden than**  
1058 **type II and type III-infected mice.** Mice were inoculated with type II, type III, or  
1059 III $\Delta$ rop16 parasites. Brains were harvested at 21 dpi and analyzed as in **Fig.2. A.**  
1060 Quantification of CNS *Toxoplasma* burden by qPCR for the *Toxoplasma*-specific B1  
1061 gene. **B.** Quantification of *Toxoplasma* cyst burden in brain sections stained with DBA.

1062 Bars, mean  $\pm$  SEM. N= 5 mice/infected group. \*p<0.05, ns=not significant, two-way  
1063 ANOVA with Fisher's protected LSD. Data representative of 3 individual experiments  
1064 with two different, individually engineered III $\Delta$ rop16 clones.

1065

1066 **Fig 9. The infection with III $\Delta$ rop16::ROP16<sub>III</sub> parasites restores type III-like CNS**

1067 **response with higher CNS macrophages/microglia and T cells.** Mice were  
1068 inoculated with type III, III $\Delta$ rop16, or III $\Delta$ rop16:ROP16 parasites. Brains were harvested  
1069 at 21 dpi and analyzed as in **Fig 1 (A,B)** or **Fig 2 (C,D)**. **A.** Quantification of the number  
1070 of Iba-1<sup>+</sup> cells (macrophages/microglia). **B.** Quantification of the number of CD3<sup>+</sup> T cells.  
1071 Bars, mean  $\pm$  SEM. N= 12 fields of view/section, 3 sections/mouse, 4-5 mice/infected  
1072 group. For each mouse, the number of cells/section was averaged to create a single  
1073 point. **C.** Quantification of CNS *Toxoplasma* burden by qPCR for the *Toxoplasma*-  
1074 specific B1 gene. **D.** Quantification of *Toxoplasma* cyst burden in brain sections stained  
1075 with DBA. At 21 dpi, immune cells were isolated from brains infected mice and then  
1076 stained and analyzed as in **Fig.3**. **E.** CNS mononuclear cells evaluated for the presence  
1077 of M2 macrophages. **F.** CNS mononuclear cells evaluated for the presence of M1  
1078 macrophages. Bars, mean  $\pm$  SEM. N= 12 fields of view/section, 3 sections/mouse, 4-5  
1079 mice/infected group. \*p<0.05, \*\*p<0.01, two-way ANOVA with Fisher's protected LSD.  
1080 Data representative of 2 individual experiments using a single III $\Delta$ rop16 clone and  
1081 III $\Delta$ rop16:ROP16 clone.

1082

1083 **Fig 10. III $\Delta$ rop16 infected mice showed a mixed immune response in the**

1084 **periphery.** At 5 dpi, immune cells were isolated from the spleen of infected mice and

1085 then stained and analyzed as in **Fig. 3. A.** Quantification of the frequency and number  
1086 of splenic M2 macrophages. **B.** Quantification of the frequency and number of splenic  
1087 M1 macrophages. **C.** Quantification of the frequency and number of Tregs. **D.**  
1088 Quantification of the number and mean fluorescence intensity of splenic IFN- $\gamma$   
1089 producing CD4<sup>+</sup> T cells. **F.** Quantification of the number and mean fluorescence  
1090 intensity of splenic IFN- $\gamma$  producing CD8<sup>+</sup> T cells. Bars, mean  $\pm$  SEM N= 5 mice/infected  
1091 group. \*p<0.05, \*\*p<0.01, \*\*\*p<0.001, \*\*\*\*p<0.0001, two-way ANOVA with Fisher's  
1092 protected LSD. Data representative of 3 individual experiments with two different,  
1093 individually engineered III $\Delta$ *rop16* clones.

1094

1095 **Fig 11. III $\Delta$ *rop16*::*ROP16*<sub>III</sub> infected mice showed a type III-like immune response**  
1096 **in the periphery.** At 5 dpi, immune cells were isolated from the spleen of infected mice  
1097 and then stained and analyzed as in Fig 3. **A.** Quantification of the frequency and  
1098 number of splenic M2 macrophages. **B.** Quantification of the frequency and number of  
1099 splenic M1 macrophages. **C.** Quantification of the frequency and number of splenic  
1100 Tregs. **D.** Quantification of the number and mean fluorescence intensity of splenic IFN- $\gamma$   
1101 producing CD4<sup>+</sup> T cells. **E.** Quantification of the number and mean fluorescence  
1102 intensity of splenic IFN- $\gamma$  producing CD8<sup>+</sup> T cells. Bars, mean  $\pm$  SEM N= 5 mice/infected  
1103 group. \*p<0.05, \*\*p<0.01, \*\*\*p<0.001, \*\*\*\*p<0.0001, two-way ANOVA with Fisher's  
1104 protected LSD. Data representative of 2 individual experiments using a single III $\Delta$ *rop16*  
1105 clone and III $\Delta$ *rop16*::*ROP16* clone.

1106

1107 **Fig 12. III $\Delta$ rop16 parasites are cleared early *in vivo*.** At 1, 3, and 5 dpi, peritoneal  
1108 exudate cells (PECs) were isolated from infected mice, stained for CD45, and then  
1109 screened for infected cells (CD45<sup>+</sup>, mCherry<sup>+</sup>). **A,B.** Representative plots of infected  
1110 PECs at **(A)** 1 dpi and **(B)** 5 dpi. **C.** Quantification of the number of infected cells over  
1111 time. Bars, mean  $\pm$  SEM. N=5 mice/infected group. \*p<0.05, \*\*\*p<0.001, two-way  
1112 ANOVA with Fisher's protected LSD. Data representative of 2 individual experiments  
1113 with two different, individually engineered III $\Delta$ rop16 clones. **D.** PECs isolated and  
1114 quantified as in **(C)**. Quantification of the number of infected cells over time. **E.** PECs  
1115 isolated and quantified as in **(C)** but using *Irgm1/3*<sup>-/-</sup> mice. Quantification of the number  
1116 of infected cells over time. **(D,E)** Bars, mean  $\pm$  SEM. N=3-4 mice/infected group. A  
1117 single III $\Delta$ rop16 clone and III $\Delta$ rop16:*ROP16* clone were used. \*\*p<0.01, one-way  
1118 ANOVA with Fisher's protected LSD. ● = type II, ■ = type III, ▲ = III $\Delta$ rop16, □ =  
1119 III $\Delta$ rop16::*ROP16*<sub>III</sub>.

1120

1121 **Fig 13. Model for strain-specific acute and sub-acute macrophage immune**  
1122 **responses. A.** During acute infection, type II parasites infect tissue resident  
1123 macrophages and, via GRA15<sub>II</sub>, modulate these macrophages to polarize to M1  
1124 macrophages and secrete IL-12. This acute elevation of IL-12 leads to more uninfected  
1125 macrophages polarizing to M1s, which will lead to more IFN- $\gamma$  production by both  
1126 macrophages and T effector cells (Teffs). This early pro-inflammatory immune response  
1127 then initiates a compensatory anti-inflammatory immune response especially at the level  
1128 of M2 macrophages. During this time, parasites proliferate and disseminate to the brain,  
1129 at which point the immune cells that are present in the periphery infiltrate into the brain.

1130 **B.** During acute infection, the type III parasites infect tissue resident macrophages, and,  
1131 via ROP16<sub>I/III</sub>, modulate these macrophages to polarize to M2 macrophages which  
1132 produce less IL-12 and more IL-4. In turn, the increased IL-4 and decreased IL-12 leads  
1133 to an increased level of uninfected M2 polarized macrophages and Teffs that produce  
1134 less IFN- $\gamma$ . This less pro-inflammatory response avoids the early compensatory anti-  
1135 inflammatory immune response. As type III parasites proliferate and disseminate, a  
1136 highly inflammatory response ensues, which then infiltrates into the brain.

1137

1138 **Table S1. List of cytokines and chemokines from the 25-plex LUMINEX assay.** The  
1139 table shows the mean concentration (pg/ml)  $\pm$  SEM of cytokines and chemokines. Blue  
1140 represents those cytokines or chemokines with a  $\geq 2$ -fold change over saline treated  
1141 controls. p-values are based on one-way ANOVA with Bonferroni post-hoc test.

1142

1143 **Fig S1. Gating scheme for macrophage markers.** Immune cells were isolated from  
1144 the brain and stained for macrophage markers. Single cells were discriminated from  
1145 doublets by plotting side scatter height (SSC-H) versus side scatter area (SSC-A). Cells  
1146 were selected by plotting SSC-A versus forward scatter area (FSC-A). Live cells were  
1147 gated on live/dead Yellow<sup>-</sup>. CD45<sup>+</sup> CD3<sup>-</sup> cells were gated by plotting CD3 versus CD45.  
1148 From the CD45<sup>+</sup> gate, F4/80<sup>+</sup> and F4/80<sup>-</sup> cells were gated by plotting FSC-A versus  
1149 F4/80. From the F4/80<sup>+</sup> gate, macrophages (Macs) were gated by plotting CD11c  
1150 versus CD11b. From the Macs gate, (CD80<sup>+</sup>/CD86<sup>+</sup>) M1 cells were gated by plotting  
1151 CD80/CD86 versus CD11b. From the Macs gate, (MMR<sup>+</sup>/CxCR3<sup>+</sup>) M2 cells were gated

1152 by plotting MMR/CXCR3 versus CD11b. Uninfected controls and isotype controls were  
1153 used to establish the gating scheme.

1154

1155 **Fig S2. Gating scheme for T cell markers.** Immune cells were isolated from the brain  
1156 and stained for T cell markers. Single cells were discriminated from doublets by plotting  
1157 side scatter height (SSC-H) versus side scatter area (SSC-A). Cells were selected by  
1158 plotting SSC-A versus forward scatter area (FSC-A). Live cells were gated on live/dead  
1159 Yellow. CD3<sup>+</sup> cells were gated by plotting SSC-A versus CD3. From the CD3<sup>+</sup> gate,  
1160 CD4<sup>+</sup> and CD8<sup>+</sup> cells were gated by plotting CD4 versus CD8. From the CD4<sup>+</sup> gate,  
1161 FoxP3<sup>+</sup> Tregs were gated by plotting FoxP3 versus CD4. Uninfected controls and  
1162 isotype controls were used to establish the gating scheme.

1163

1164 **Fig S3. Placing CD80/CD86 or MMR/CXCR3 in the same or individual channels**  
1165 **results in similar findings in type II or type III-infected mice.** At 21 dpi, immune cells  
1166 were isolated from the CNS of either type II or type III-infected mice, split, stained for  
1167 macrophage markers, and then analyzed by flow cytometry. **A.** For type II-infected  
1168 mice, the percentage and number of M2 macrophages identified by placing MMR and  
1169 CXCR3 in the same channel or separate channels. **B.** For type II infected mice, the  
1170 percentage and number of M1 macrophages identified by placing CD80 and CD86 in  
1171 the same channel or separate channels. **C.** As in (**A**) except for type III-infected mice. **D.**  
1172 As in (**B**) except for type III-infected mice. Bars, mean  $\pm$  SEM. N= 5 mice/infected  
1173 group. ns = not significant, non-parametric t-test.

1174



1175 **Figure S4. IL-12 expression and IFN- $\gamma$  production are higher in M1s whereas Arg-**  
1176 **1 and IL-4 expression is higher in M2s.** Mice were inoculated with type II or type III  
1177 parasites. At 5dpi, splenocytes were isolated, stained, and sorted into M1s and M2s. Q-  
1178 PCR was performed on RNA isolated from the M1s and M2s. **A,B.** Q-PCR quantification  
1179 of IL-12, Arg-1, and IL-4 expression from M1s and M2s from type II-infected mice. **C, D.**  
1180 As in (A,B) except from M1s and M2s from type III-infected mice. **E.** Quantification of  
1181 the frequency of IFN- $\gamma$  producing M1s and M2s. **F.** Quantification of the mean  
1182 fluorescent intensity of IFN- $\gamma$  in M1s and M2s. N =5 Mice/group

1183

1184 **Table S2: List of cells types characterized between type II and type III-infected**  
1185 **mice.**

1186

1187 **Figure S5. Generation and confirmation of III $\Delta$ *rop16* and III $\Delta$ *rop16*::*ROP16*<sub>III</sub>.** **A.**  
1188 Schematic representation of the approach used to create the III $\Delta$ *rop16* and  
1189 III $\Delta$ *rop16*::*ROP16*<sub>III</sub> complemented strains. Type III $\Delta$ *hpt* parasites were transfected with  
1190 CRISPR/CAS9 vectors targeting 500bp upstream (gRNA Up) and downstream (gRNA  
1191 Down) of the *rop16* coding sequence and a linearized vector with 500bp regions of  
1192 homology (HR) to the 5' and 3'UTRs of *rop16* surrounding either the selectable marked  
1193 *HXGPRT* alone (not shown) or the selectable marked *HXGPRT* and the *toxofilin-Cre*  
1194 coding sequence (shown). Complementation was achieved using a linearized vector  
1195 encoding a FLAG-tagged *ROP16* and a selectable bleomycin-resistance marker. **B.**  
1196 PCR of the entire *rop16* locus for the III $\Delta$ *rop16* and III $\Delta$ *rop16*::*ROP16*<sub>III</sub> strains. PCR  
1197 analysis of SAG1 was used as a DNA control. **C.** Western blots from HFFs stimulated

1198 with IL-4 or infected with parental (Type III), III $\Delta$ *rop16*, or III $\Delta$ *rop16::ROP16<sub>III</sub>* parasites.

1199 Protein isolation was done at 18 hours post-infection or stimulation. HFFs were infected

1200 at a MOI of 5.

1201

1202 **Table S3. List of Primers used throughout the paper.**

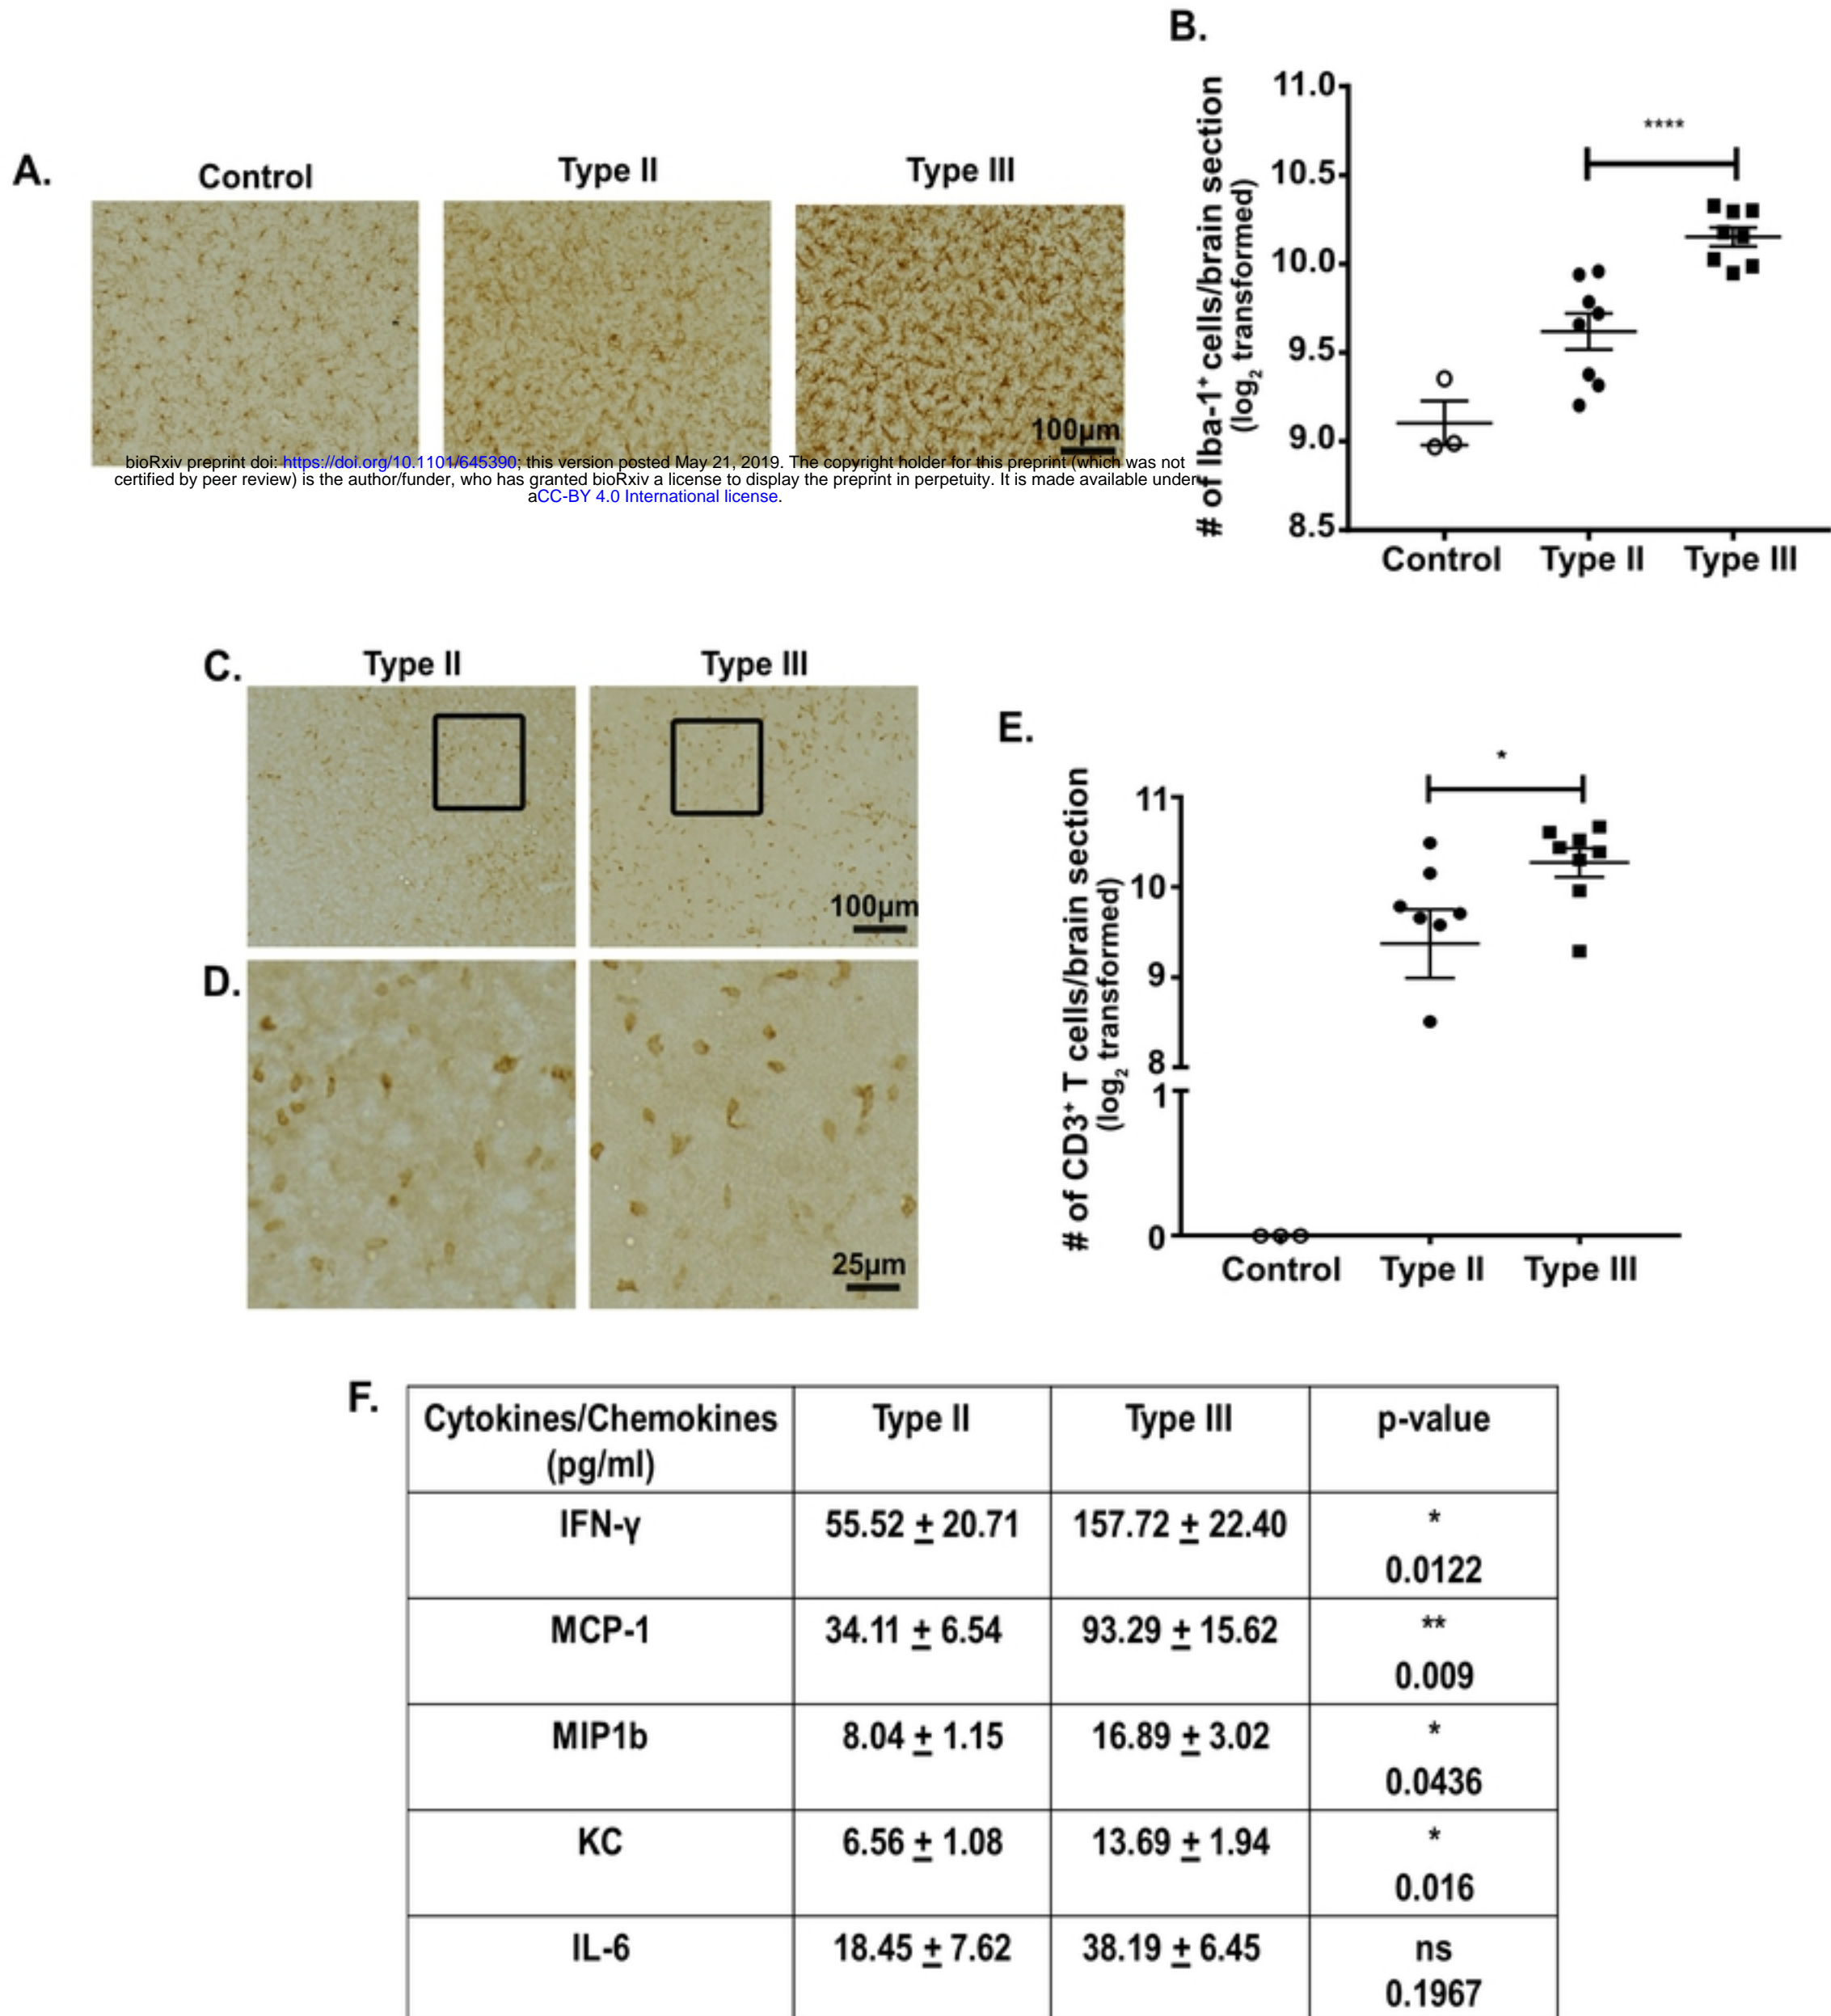

Figure 1

bioRxiv preprint doi: <https://doi.org/10.1101/648390>; this version posted May 21, 2019. The copyright holder for this preprint (which was not certified by peer review) is the author/funder, who has granted bioRxiv a license to display the preprint in perpetuity. It is made available under aCC-BY 4.0 International license.

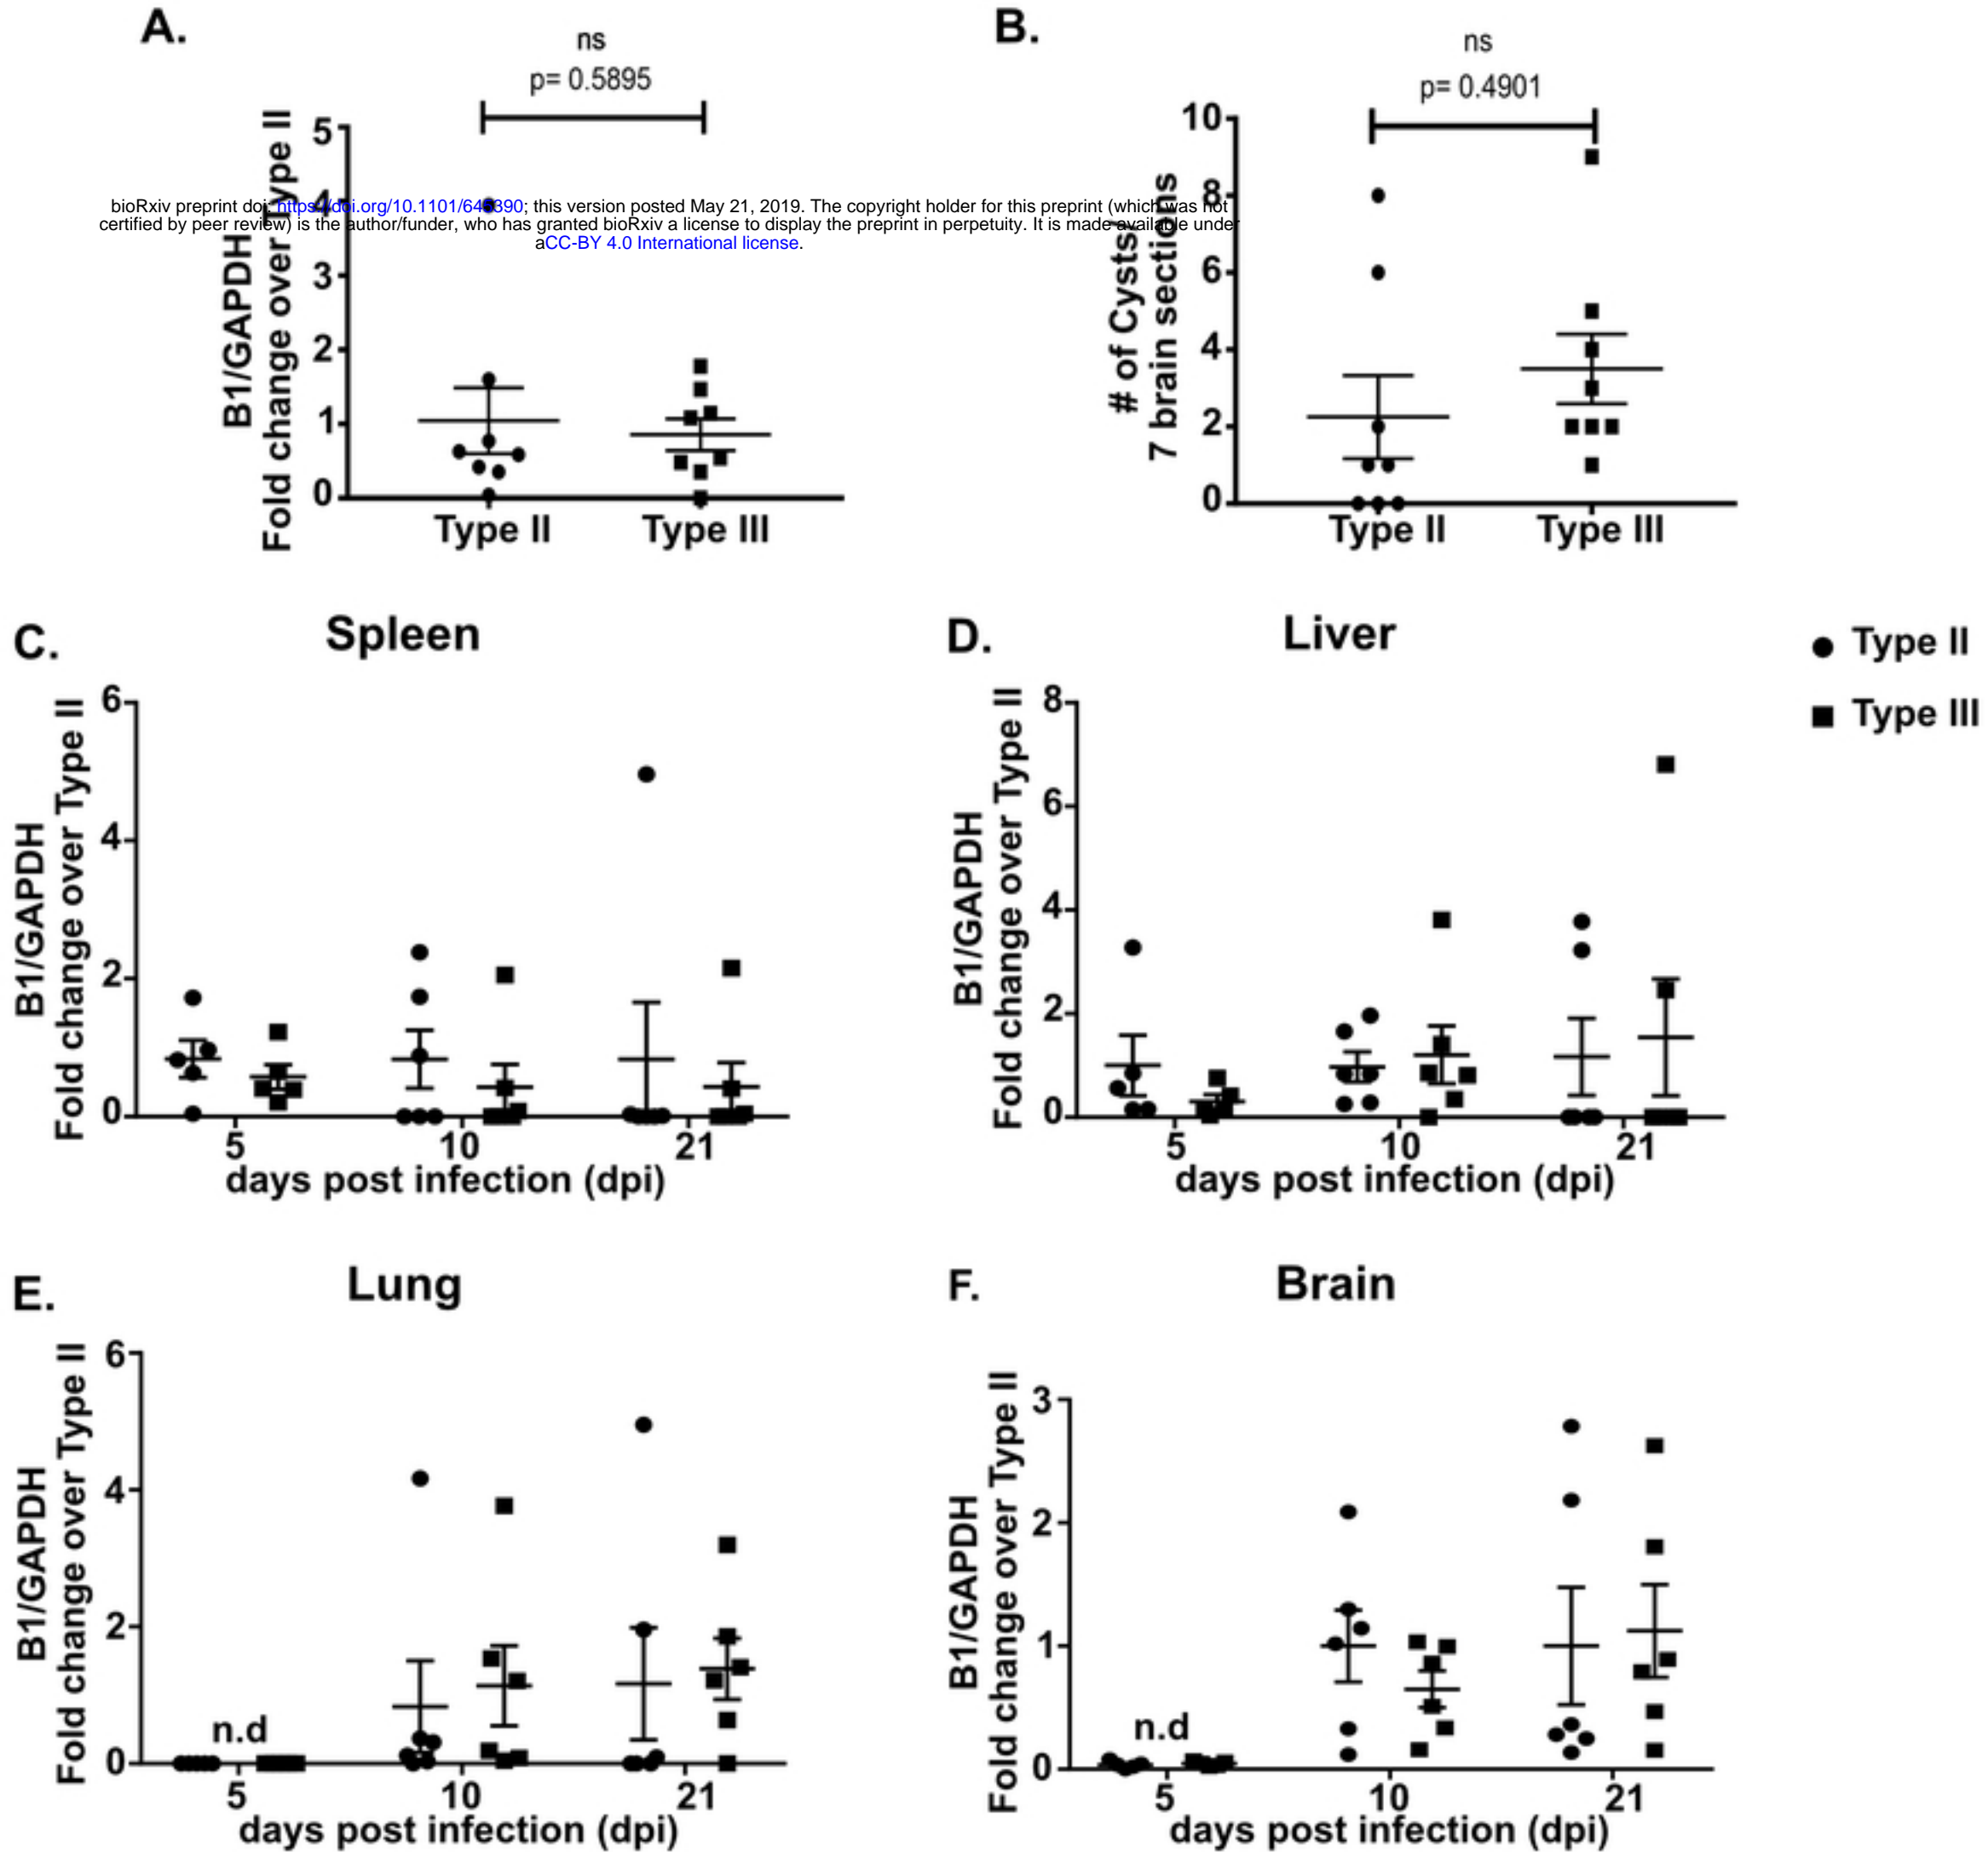

Figure 2

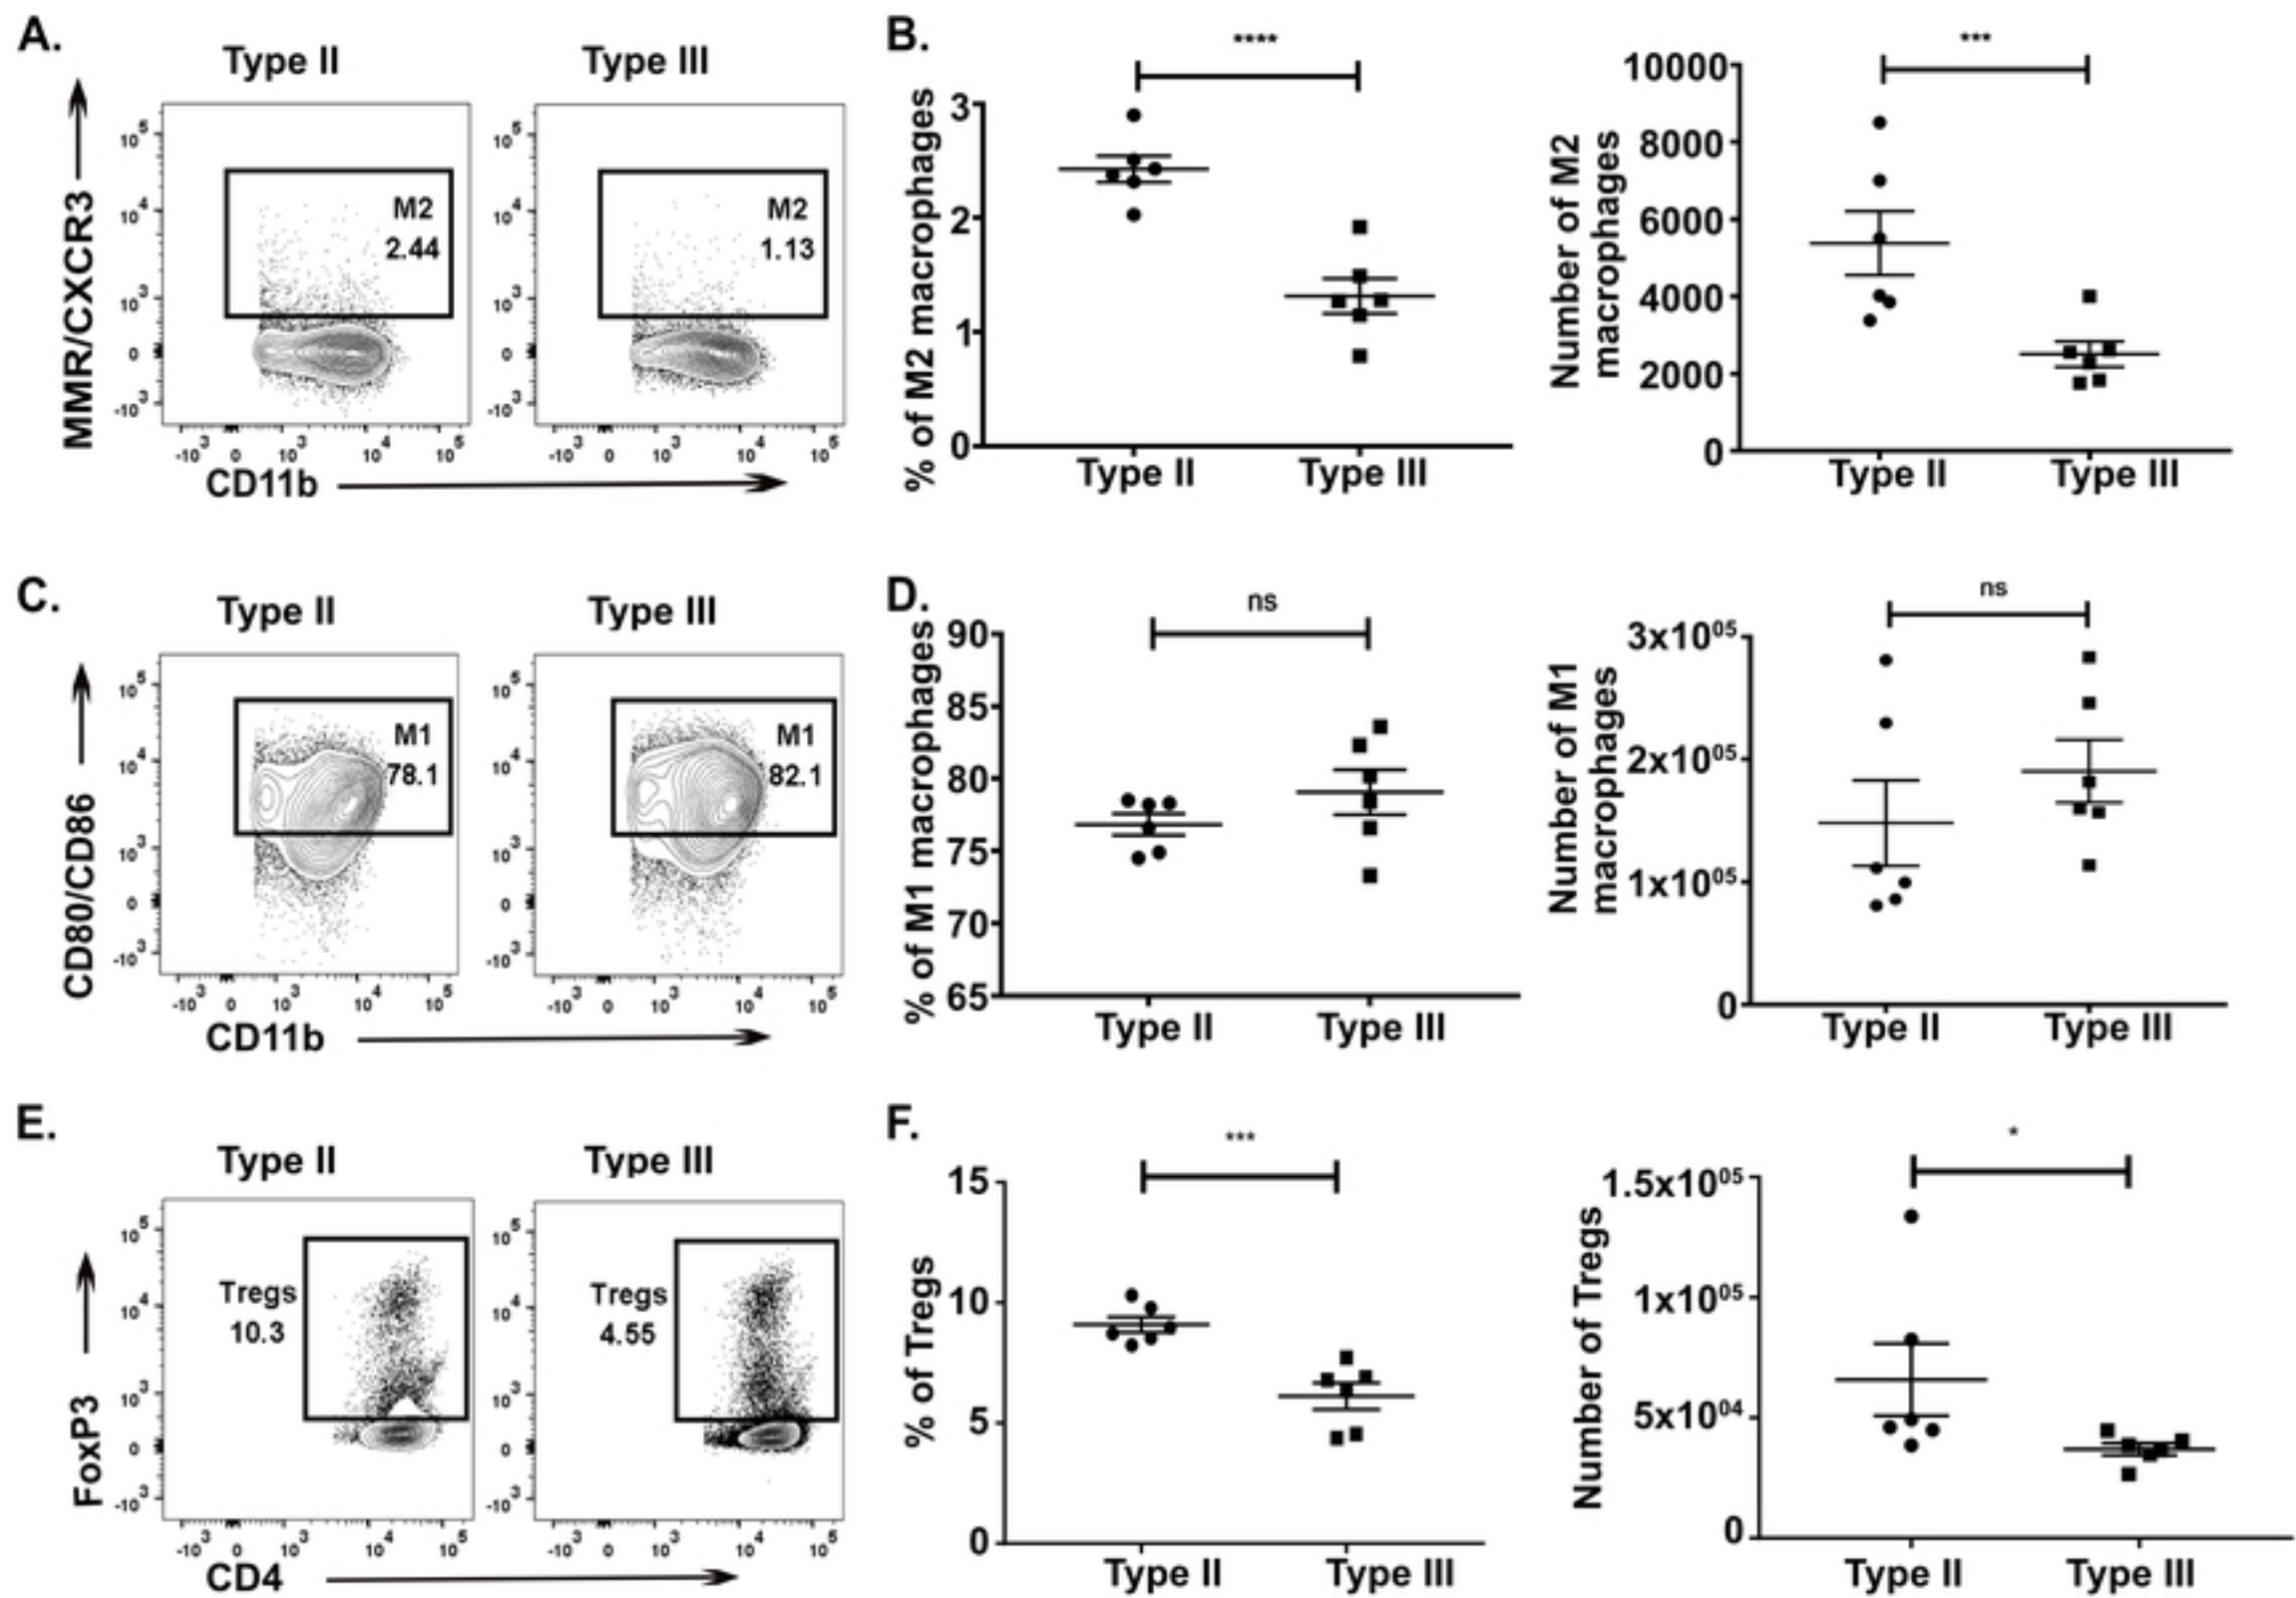

Figure 3

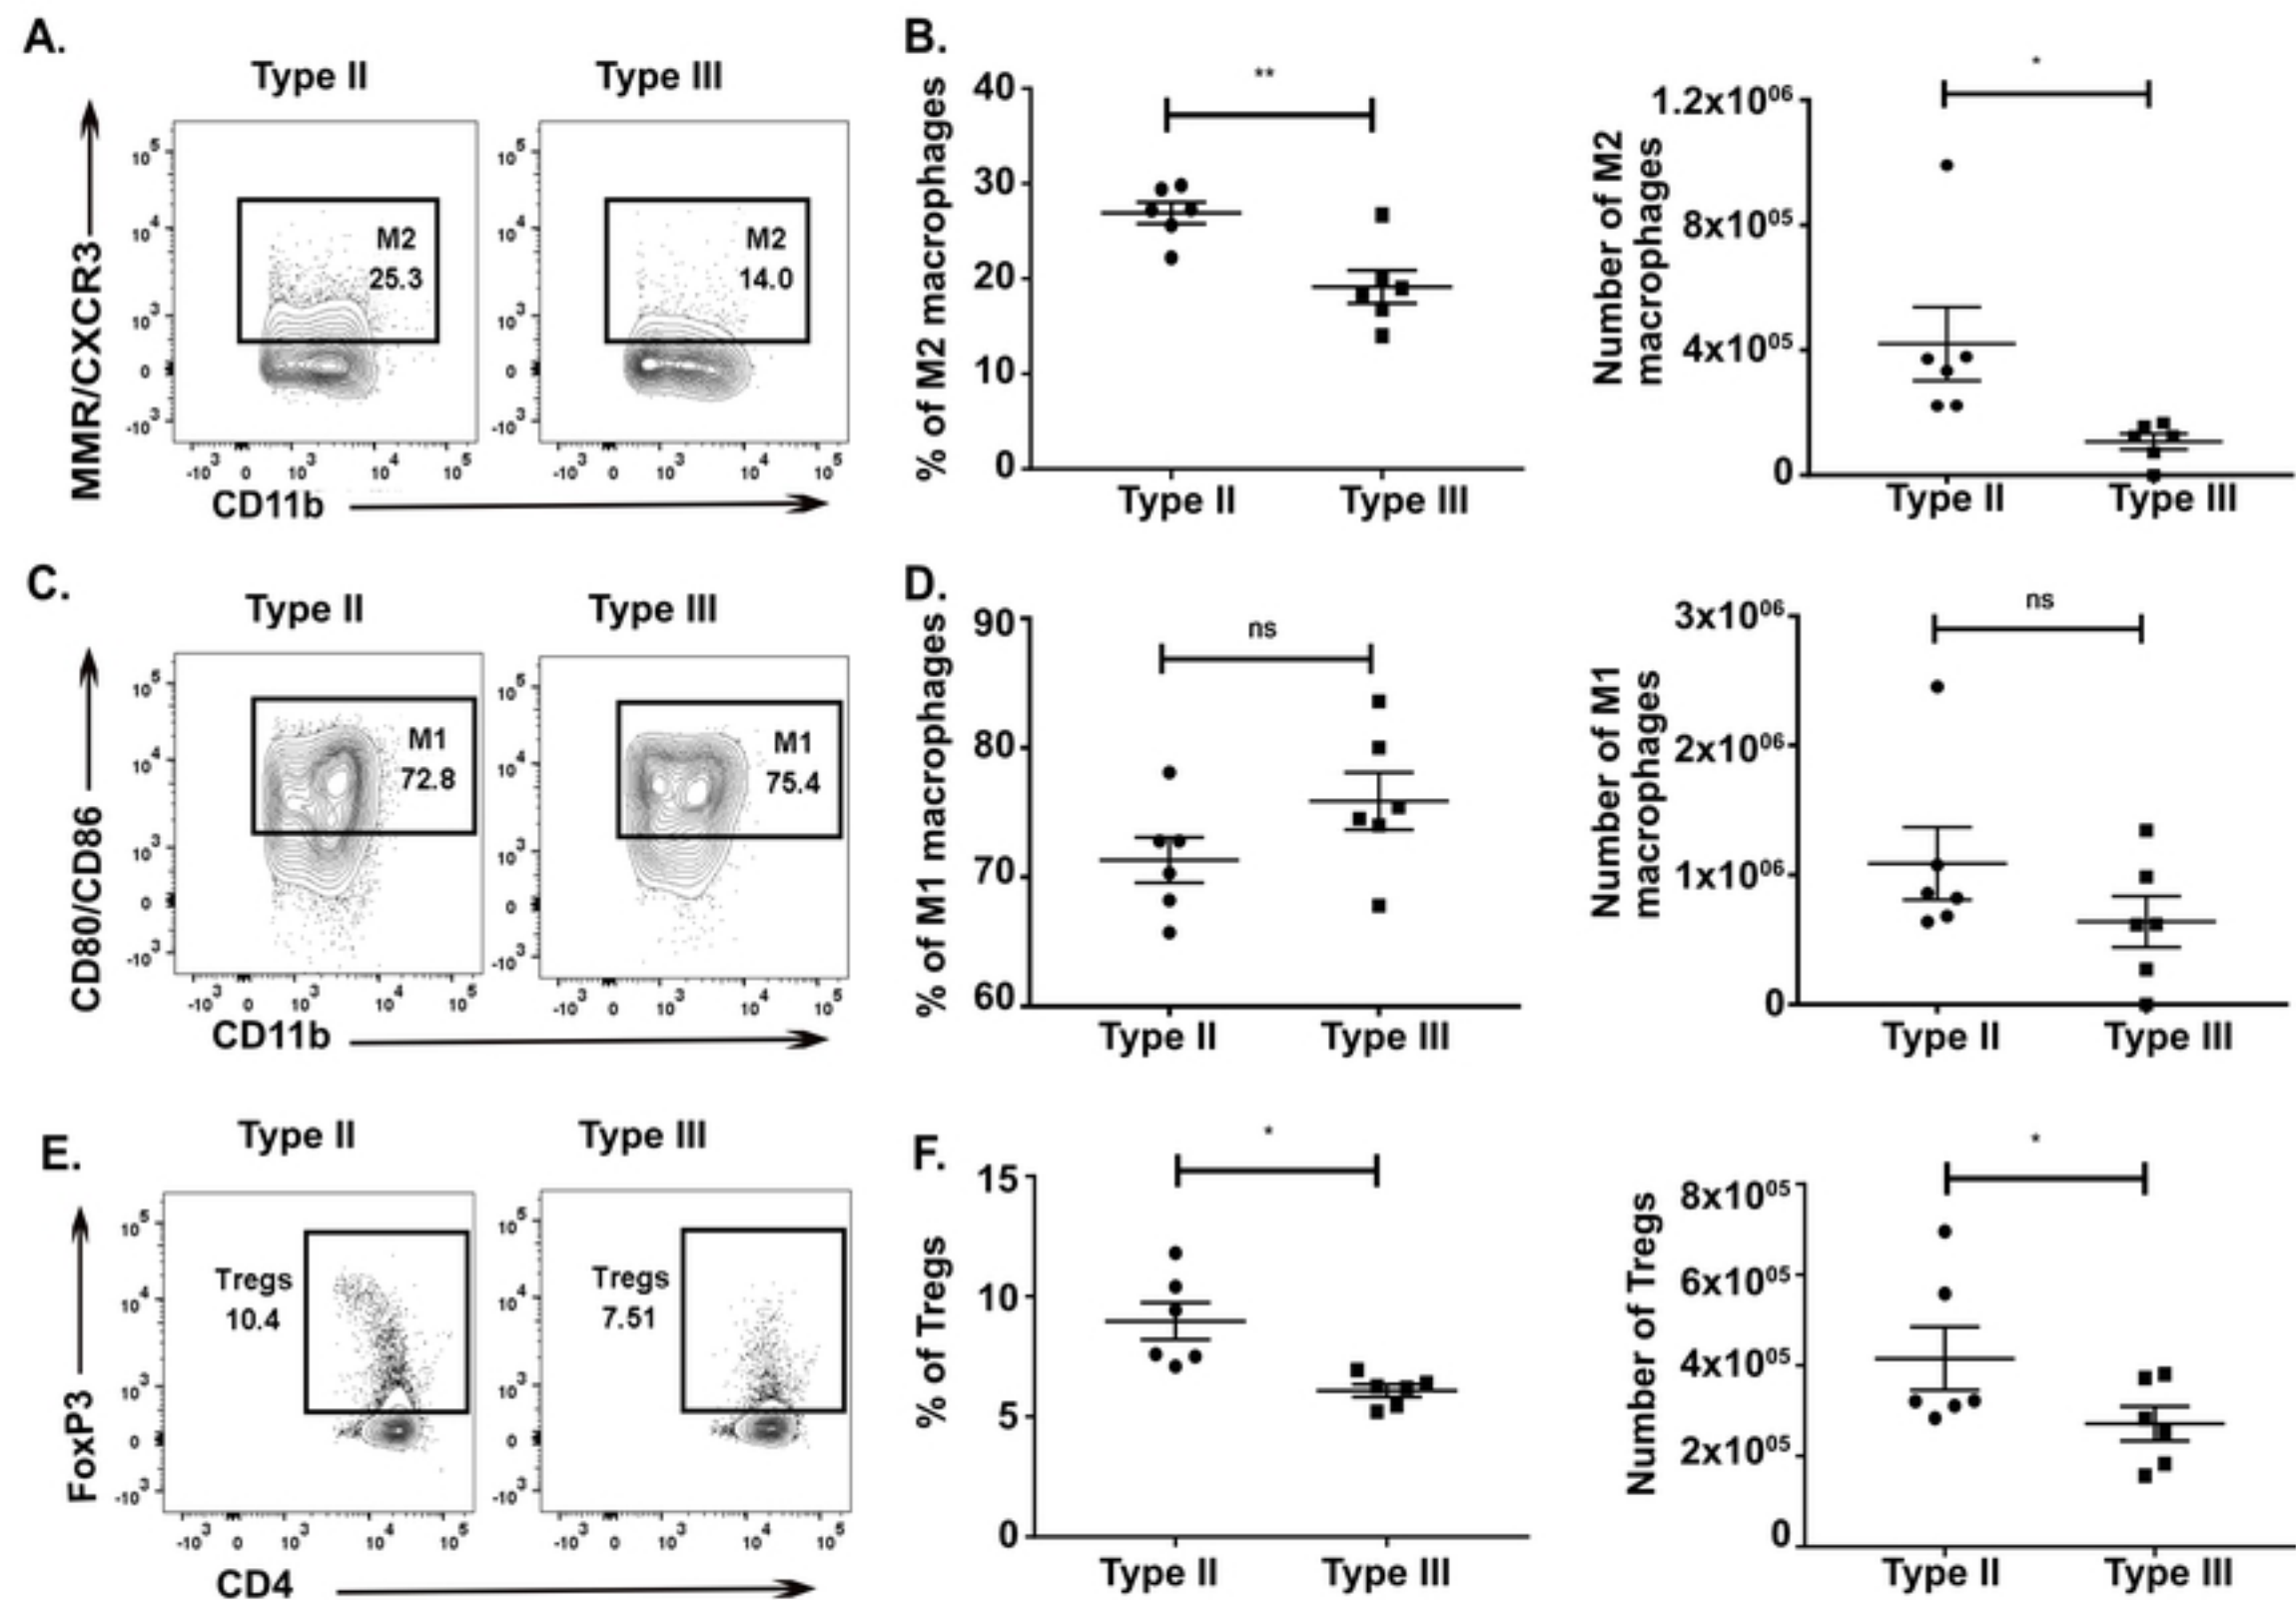

Figure 4

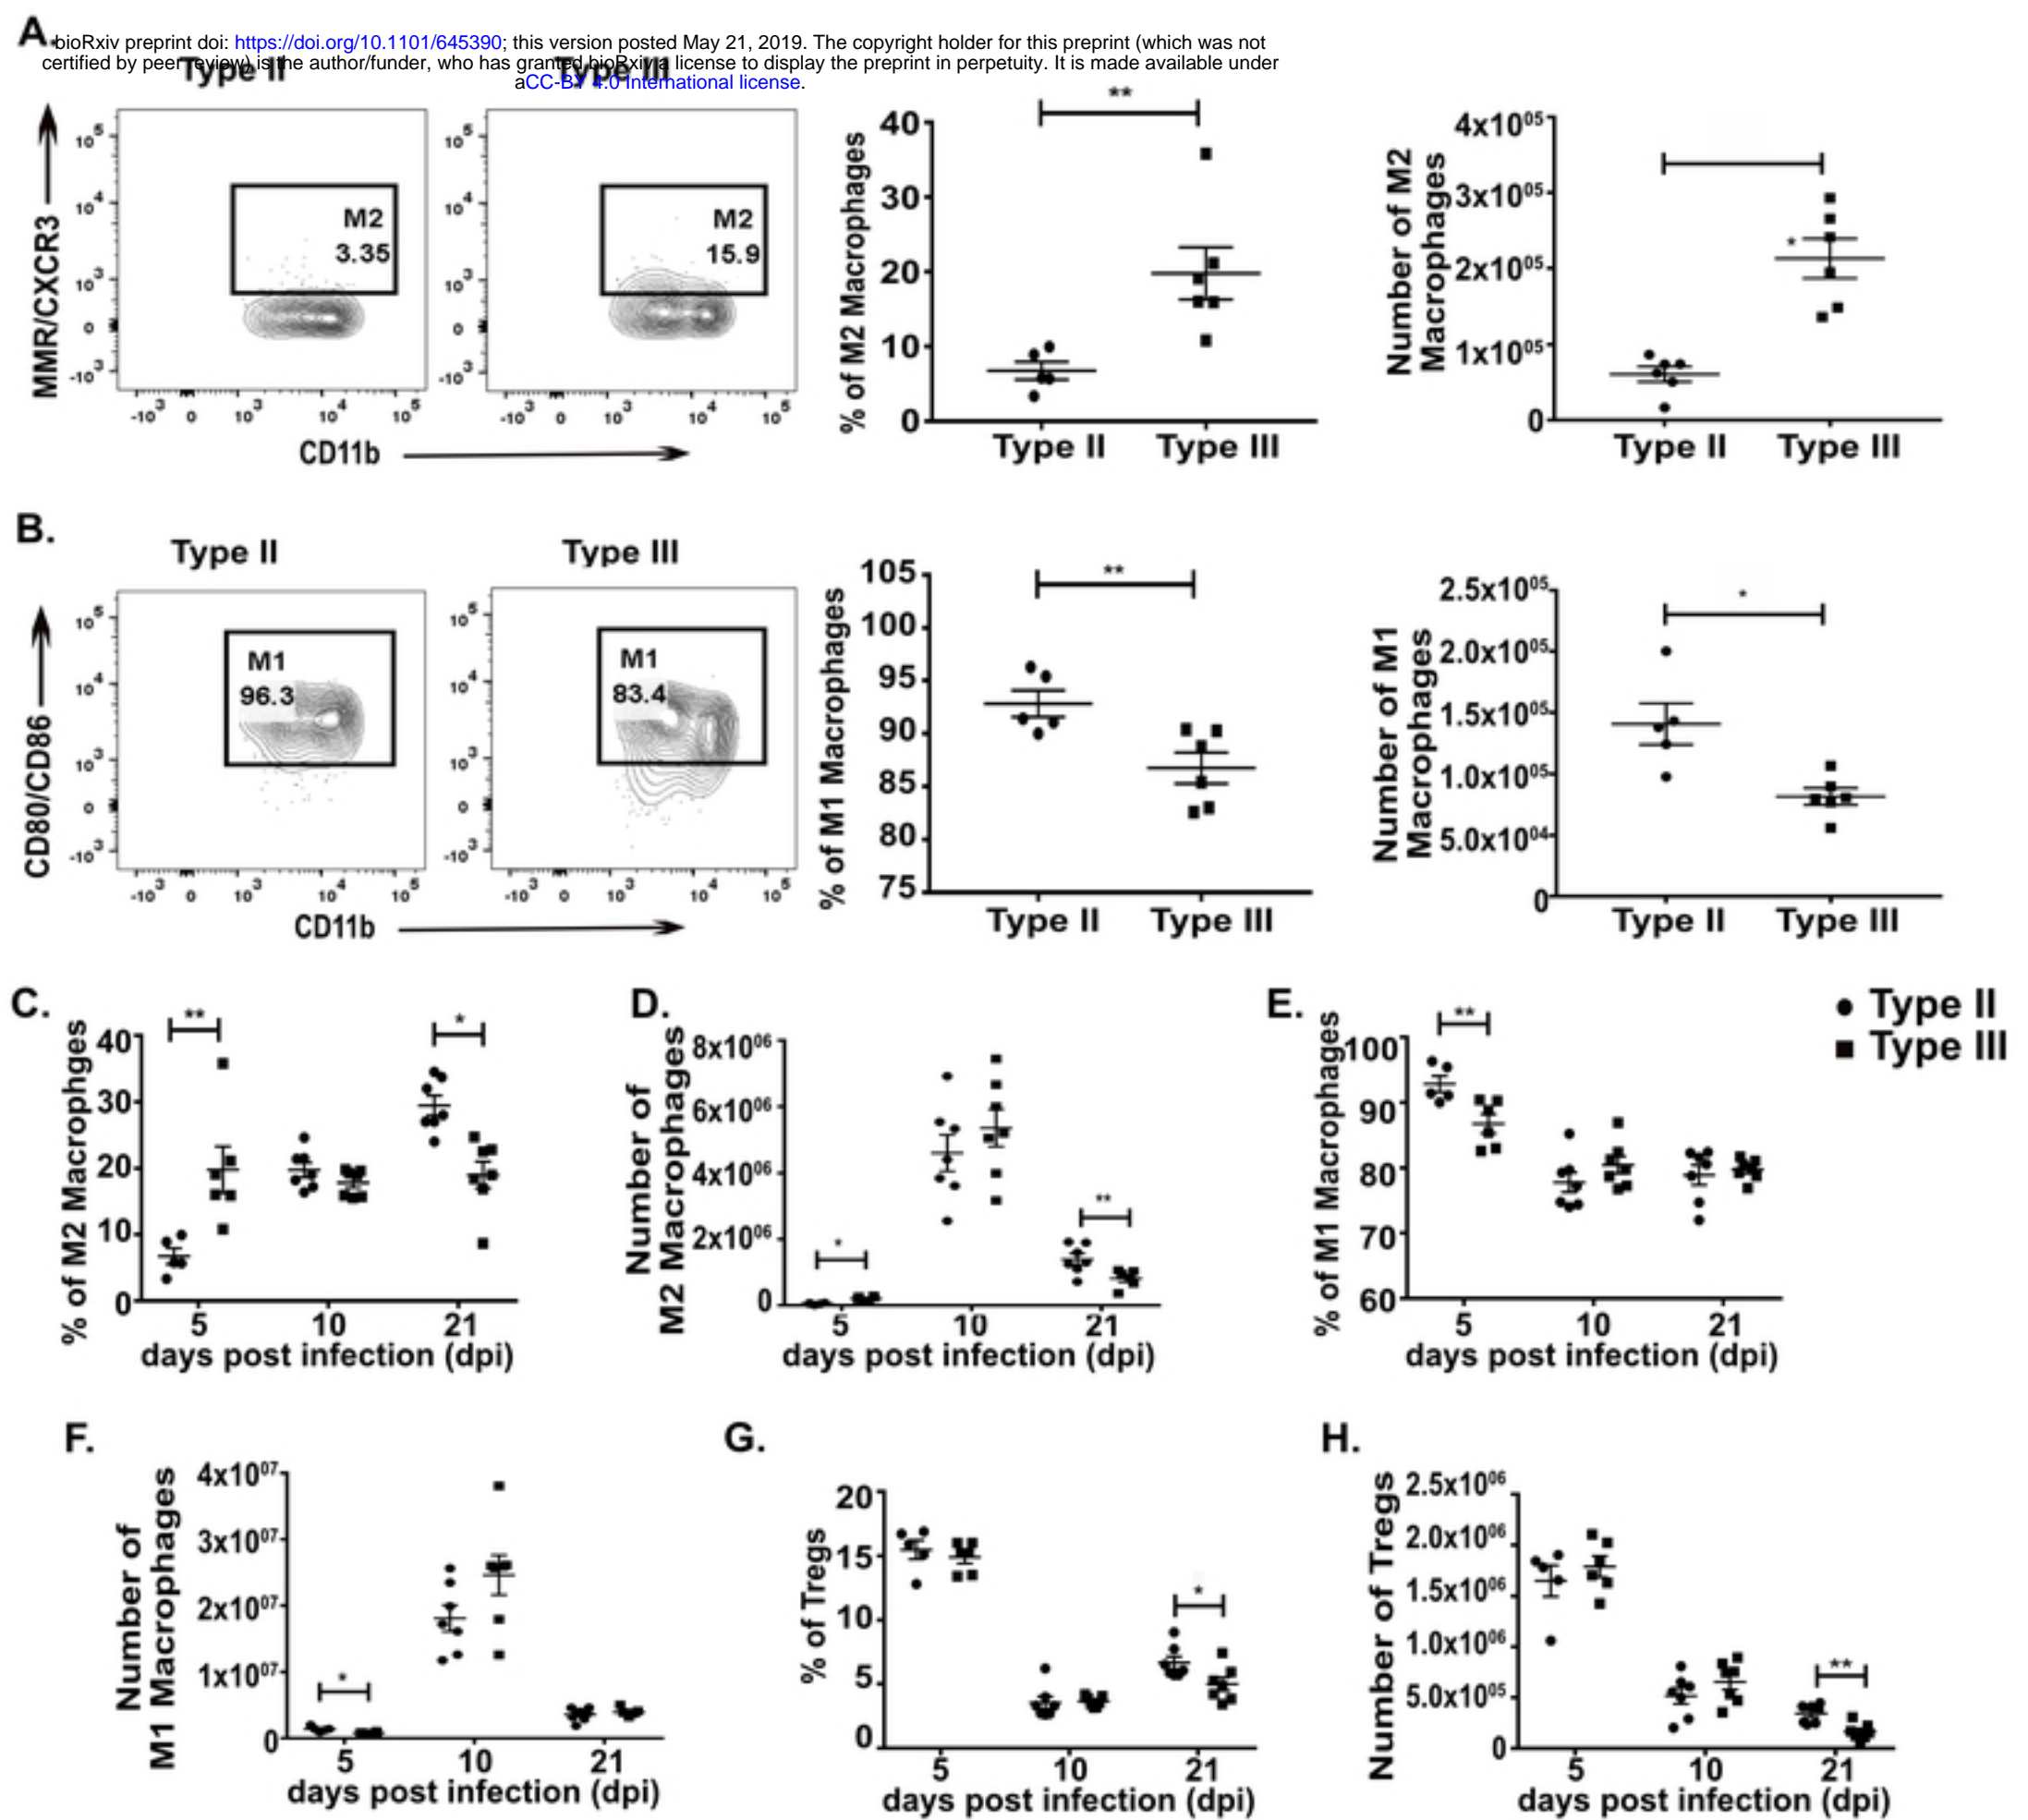

Figure 5

**A.**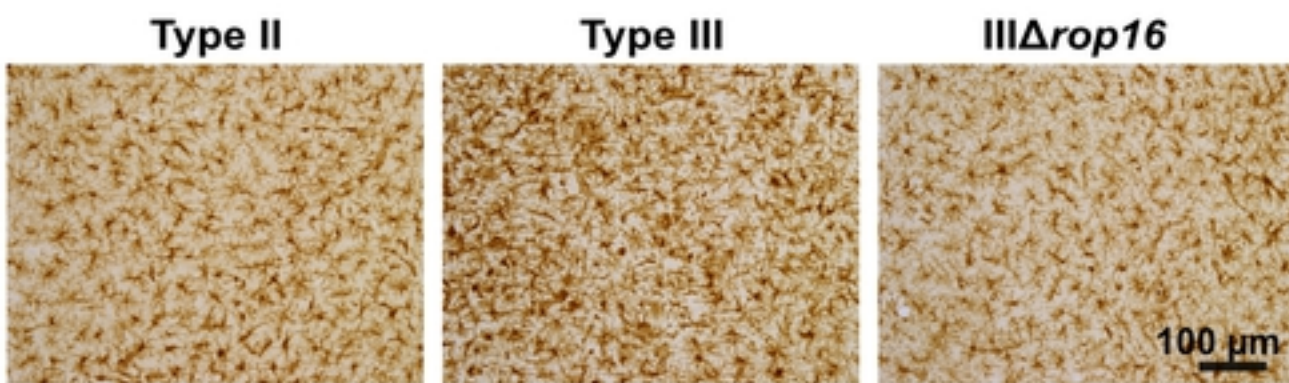**B.**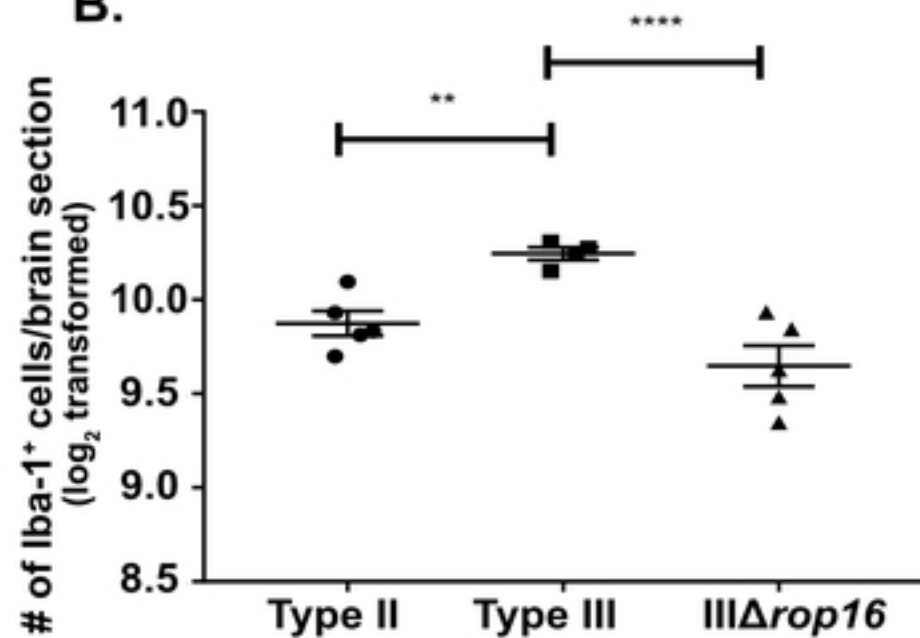**C.**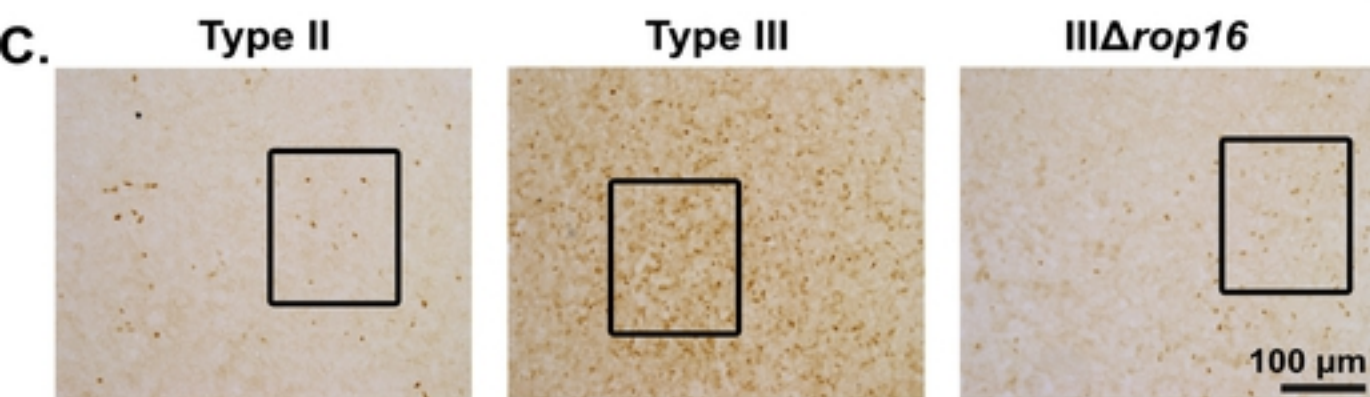**D.**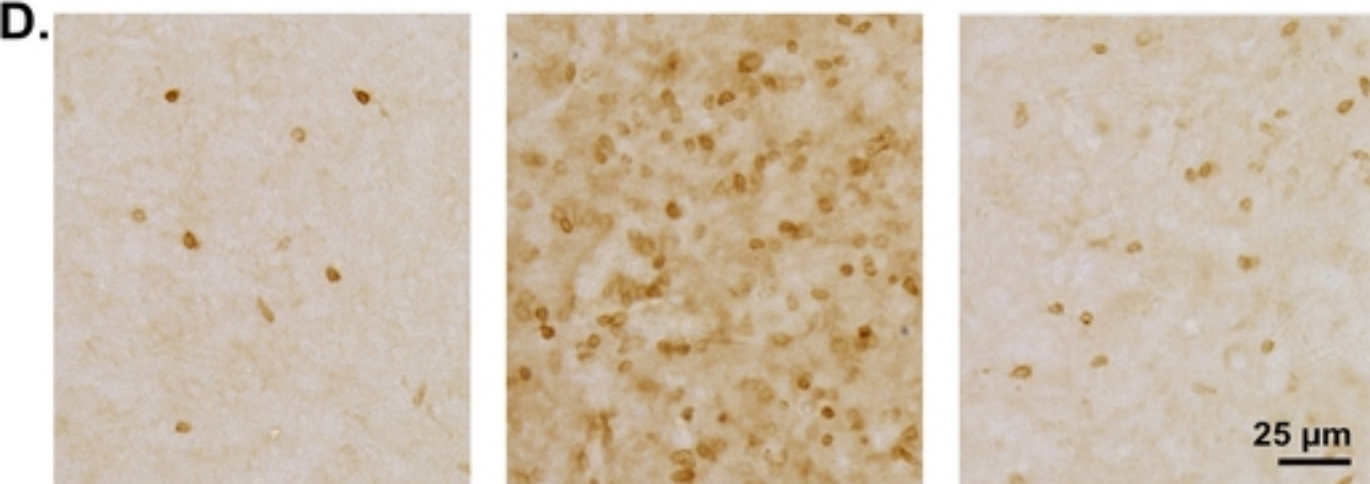**E.**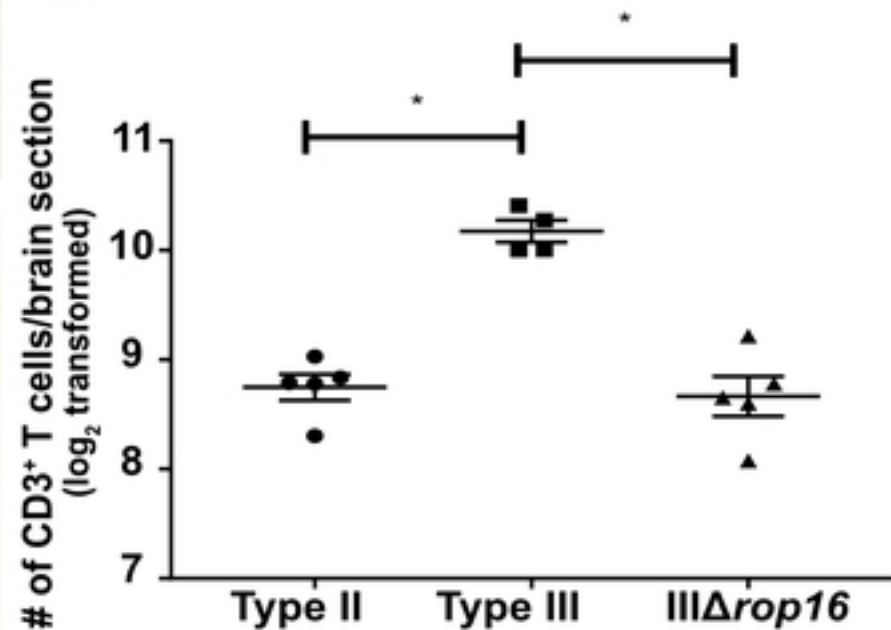

Figure 6



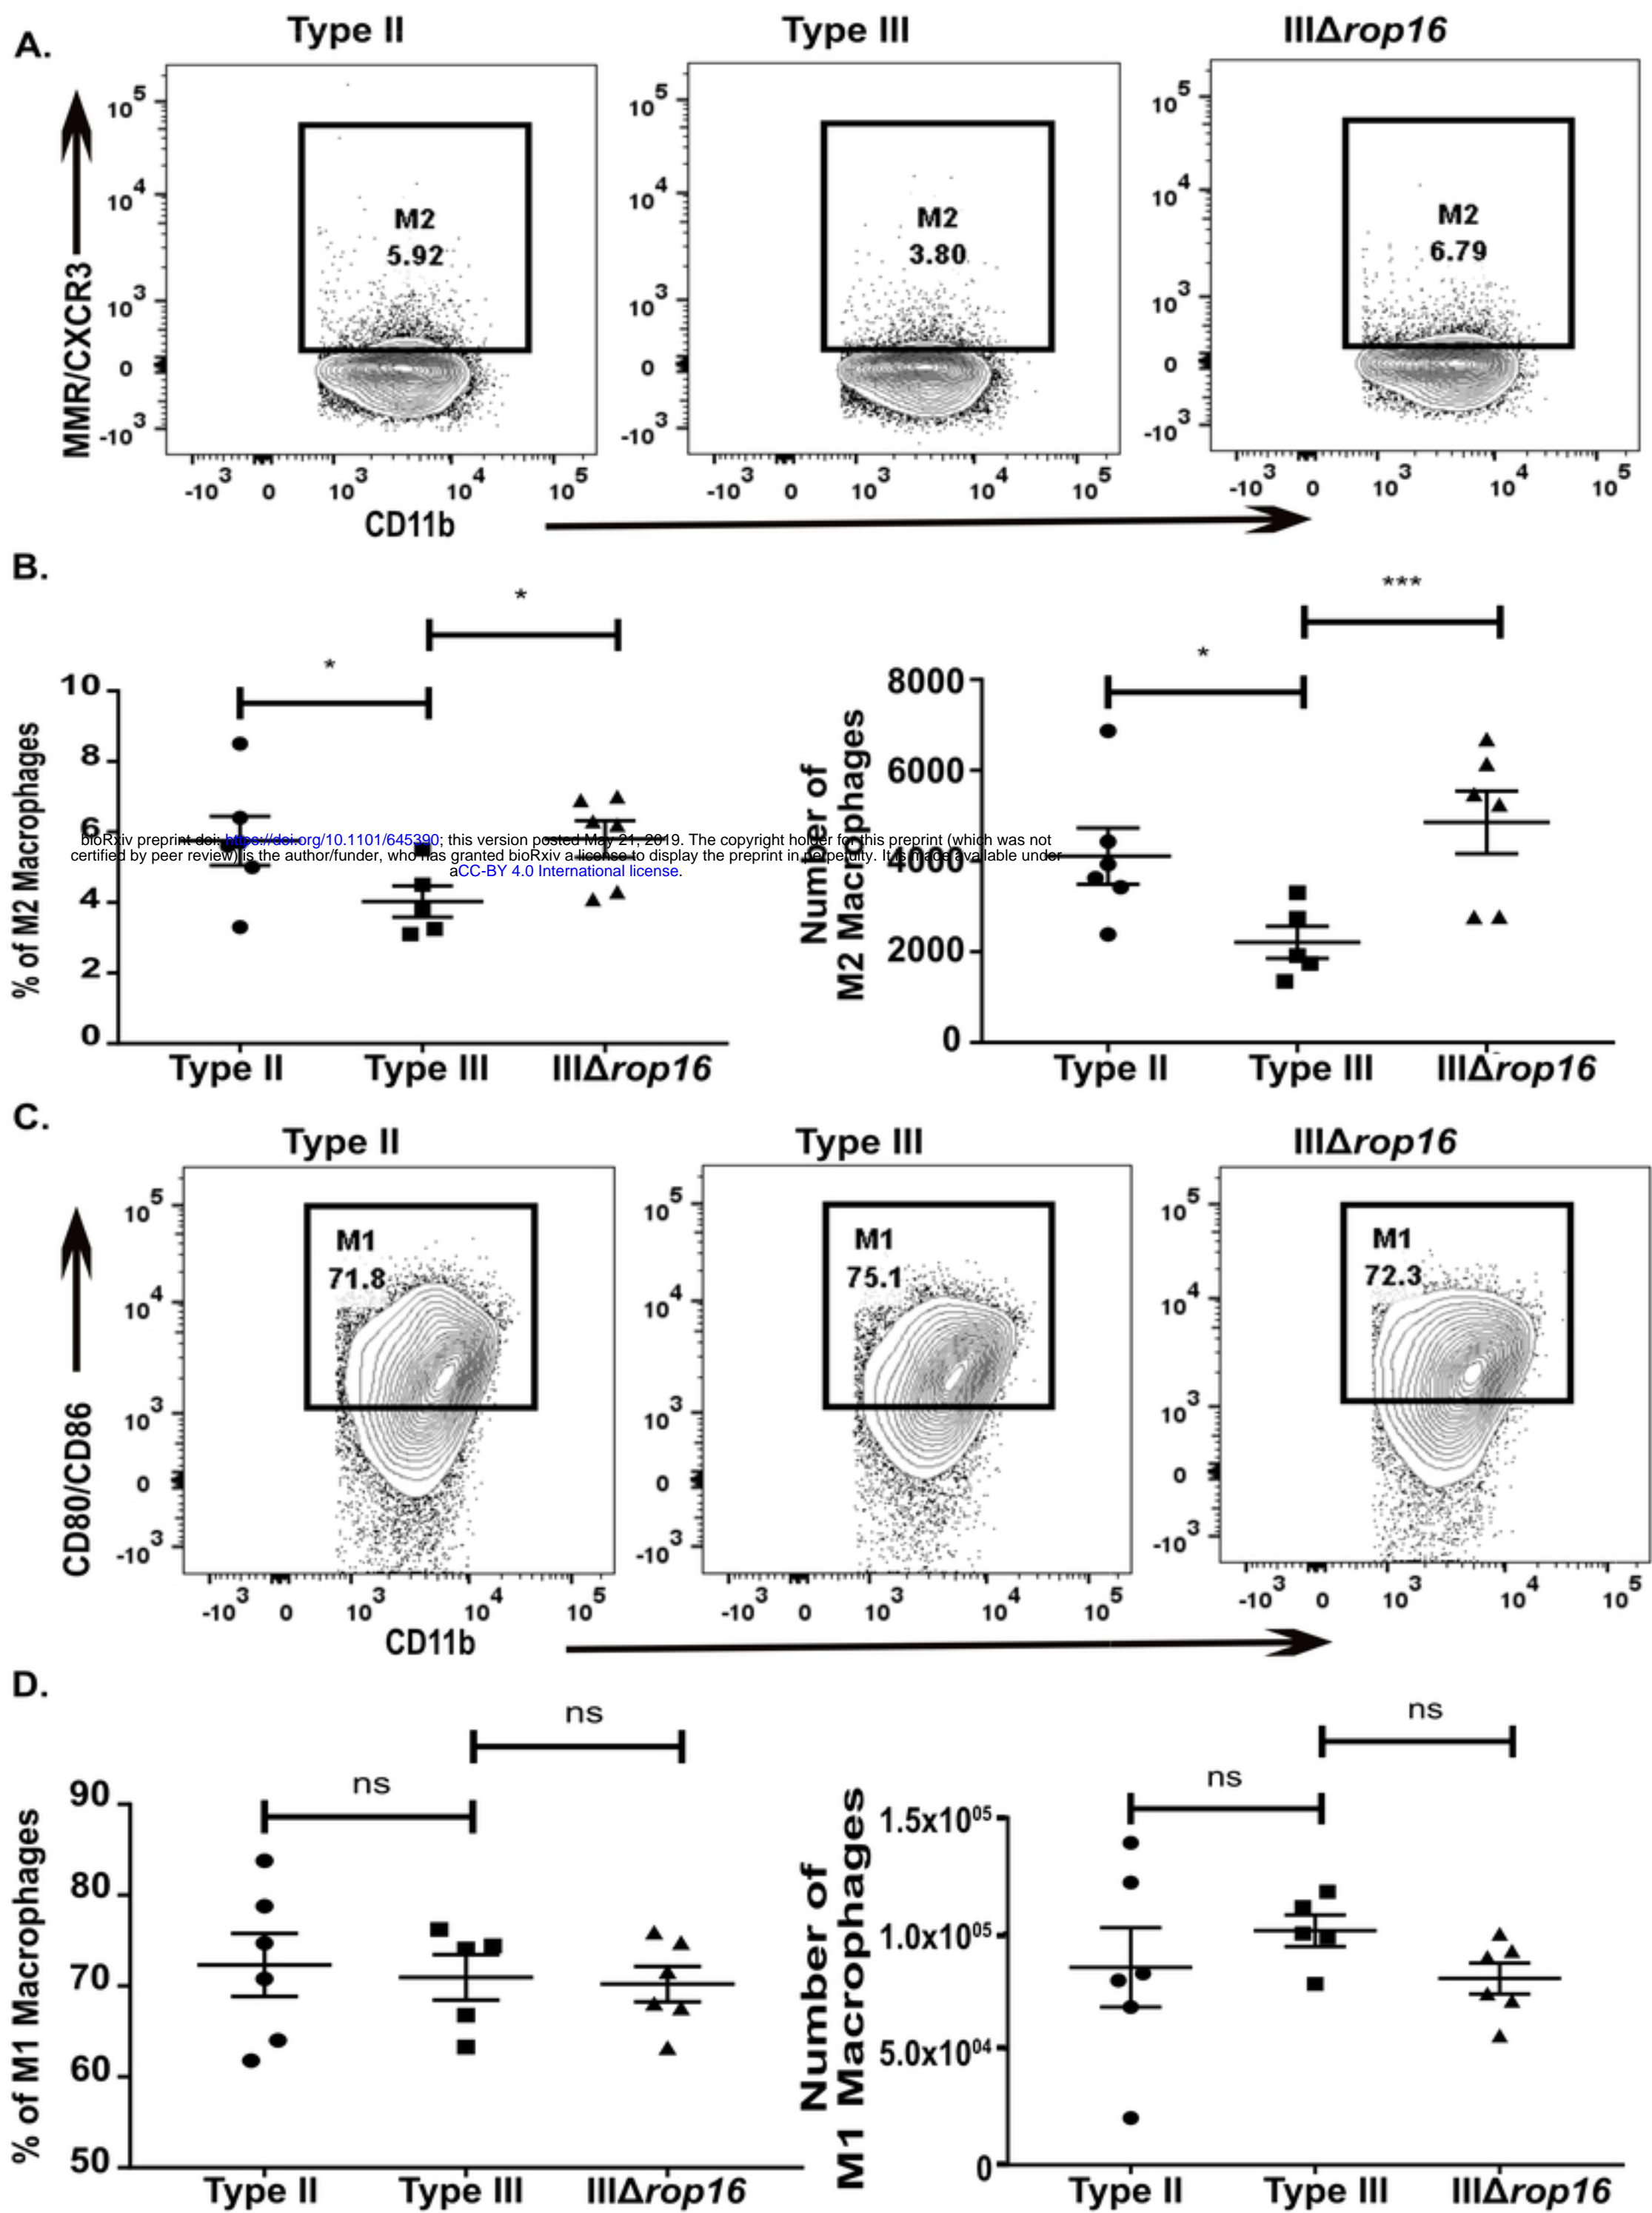

Figure 7

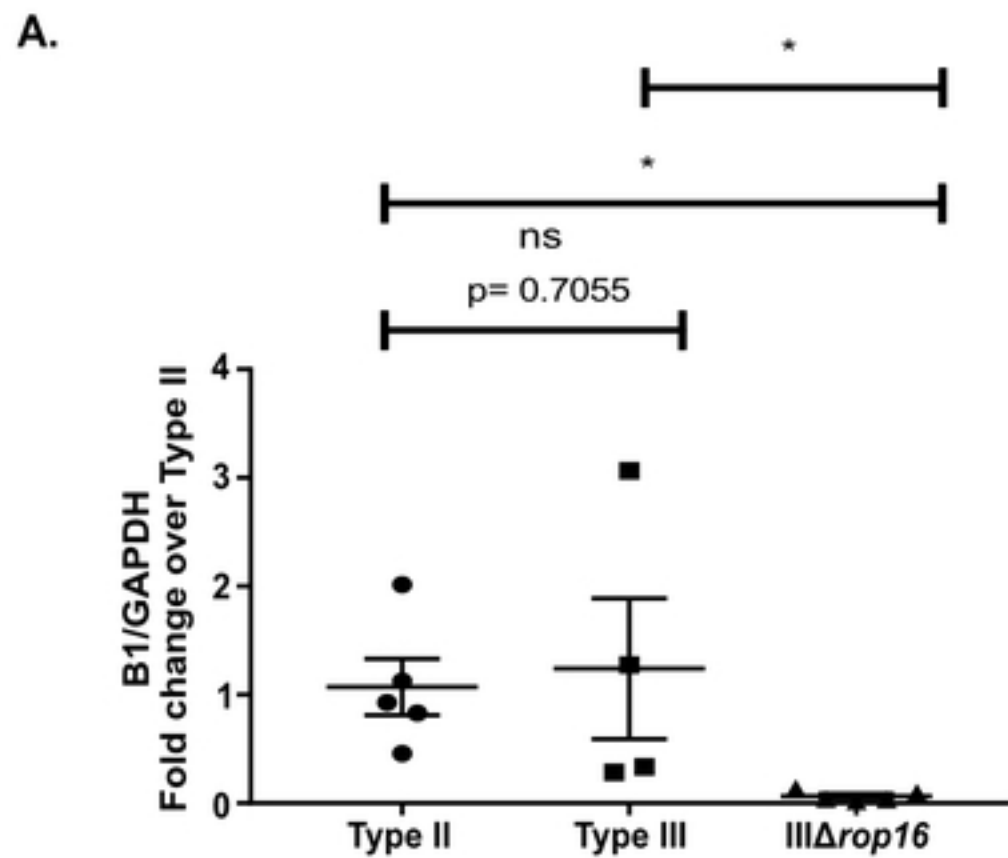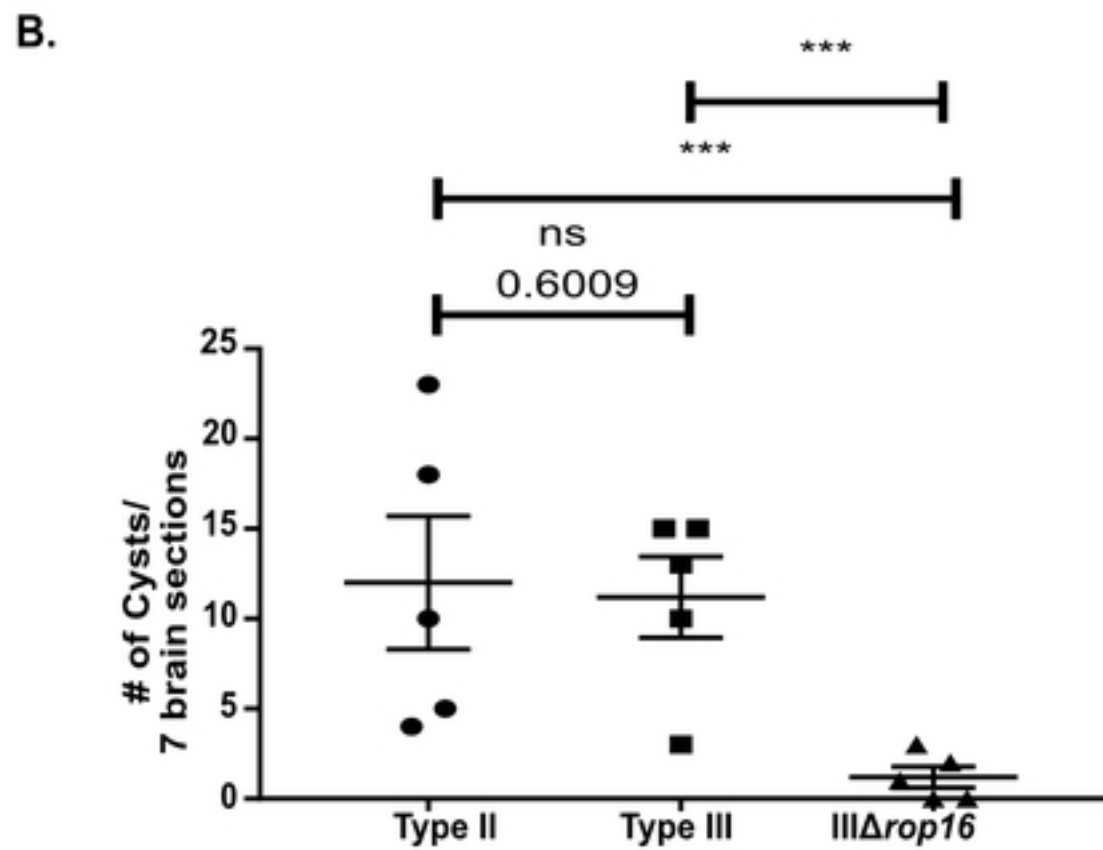

Figure 8

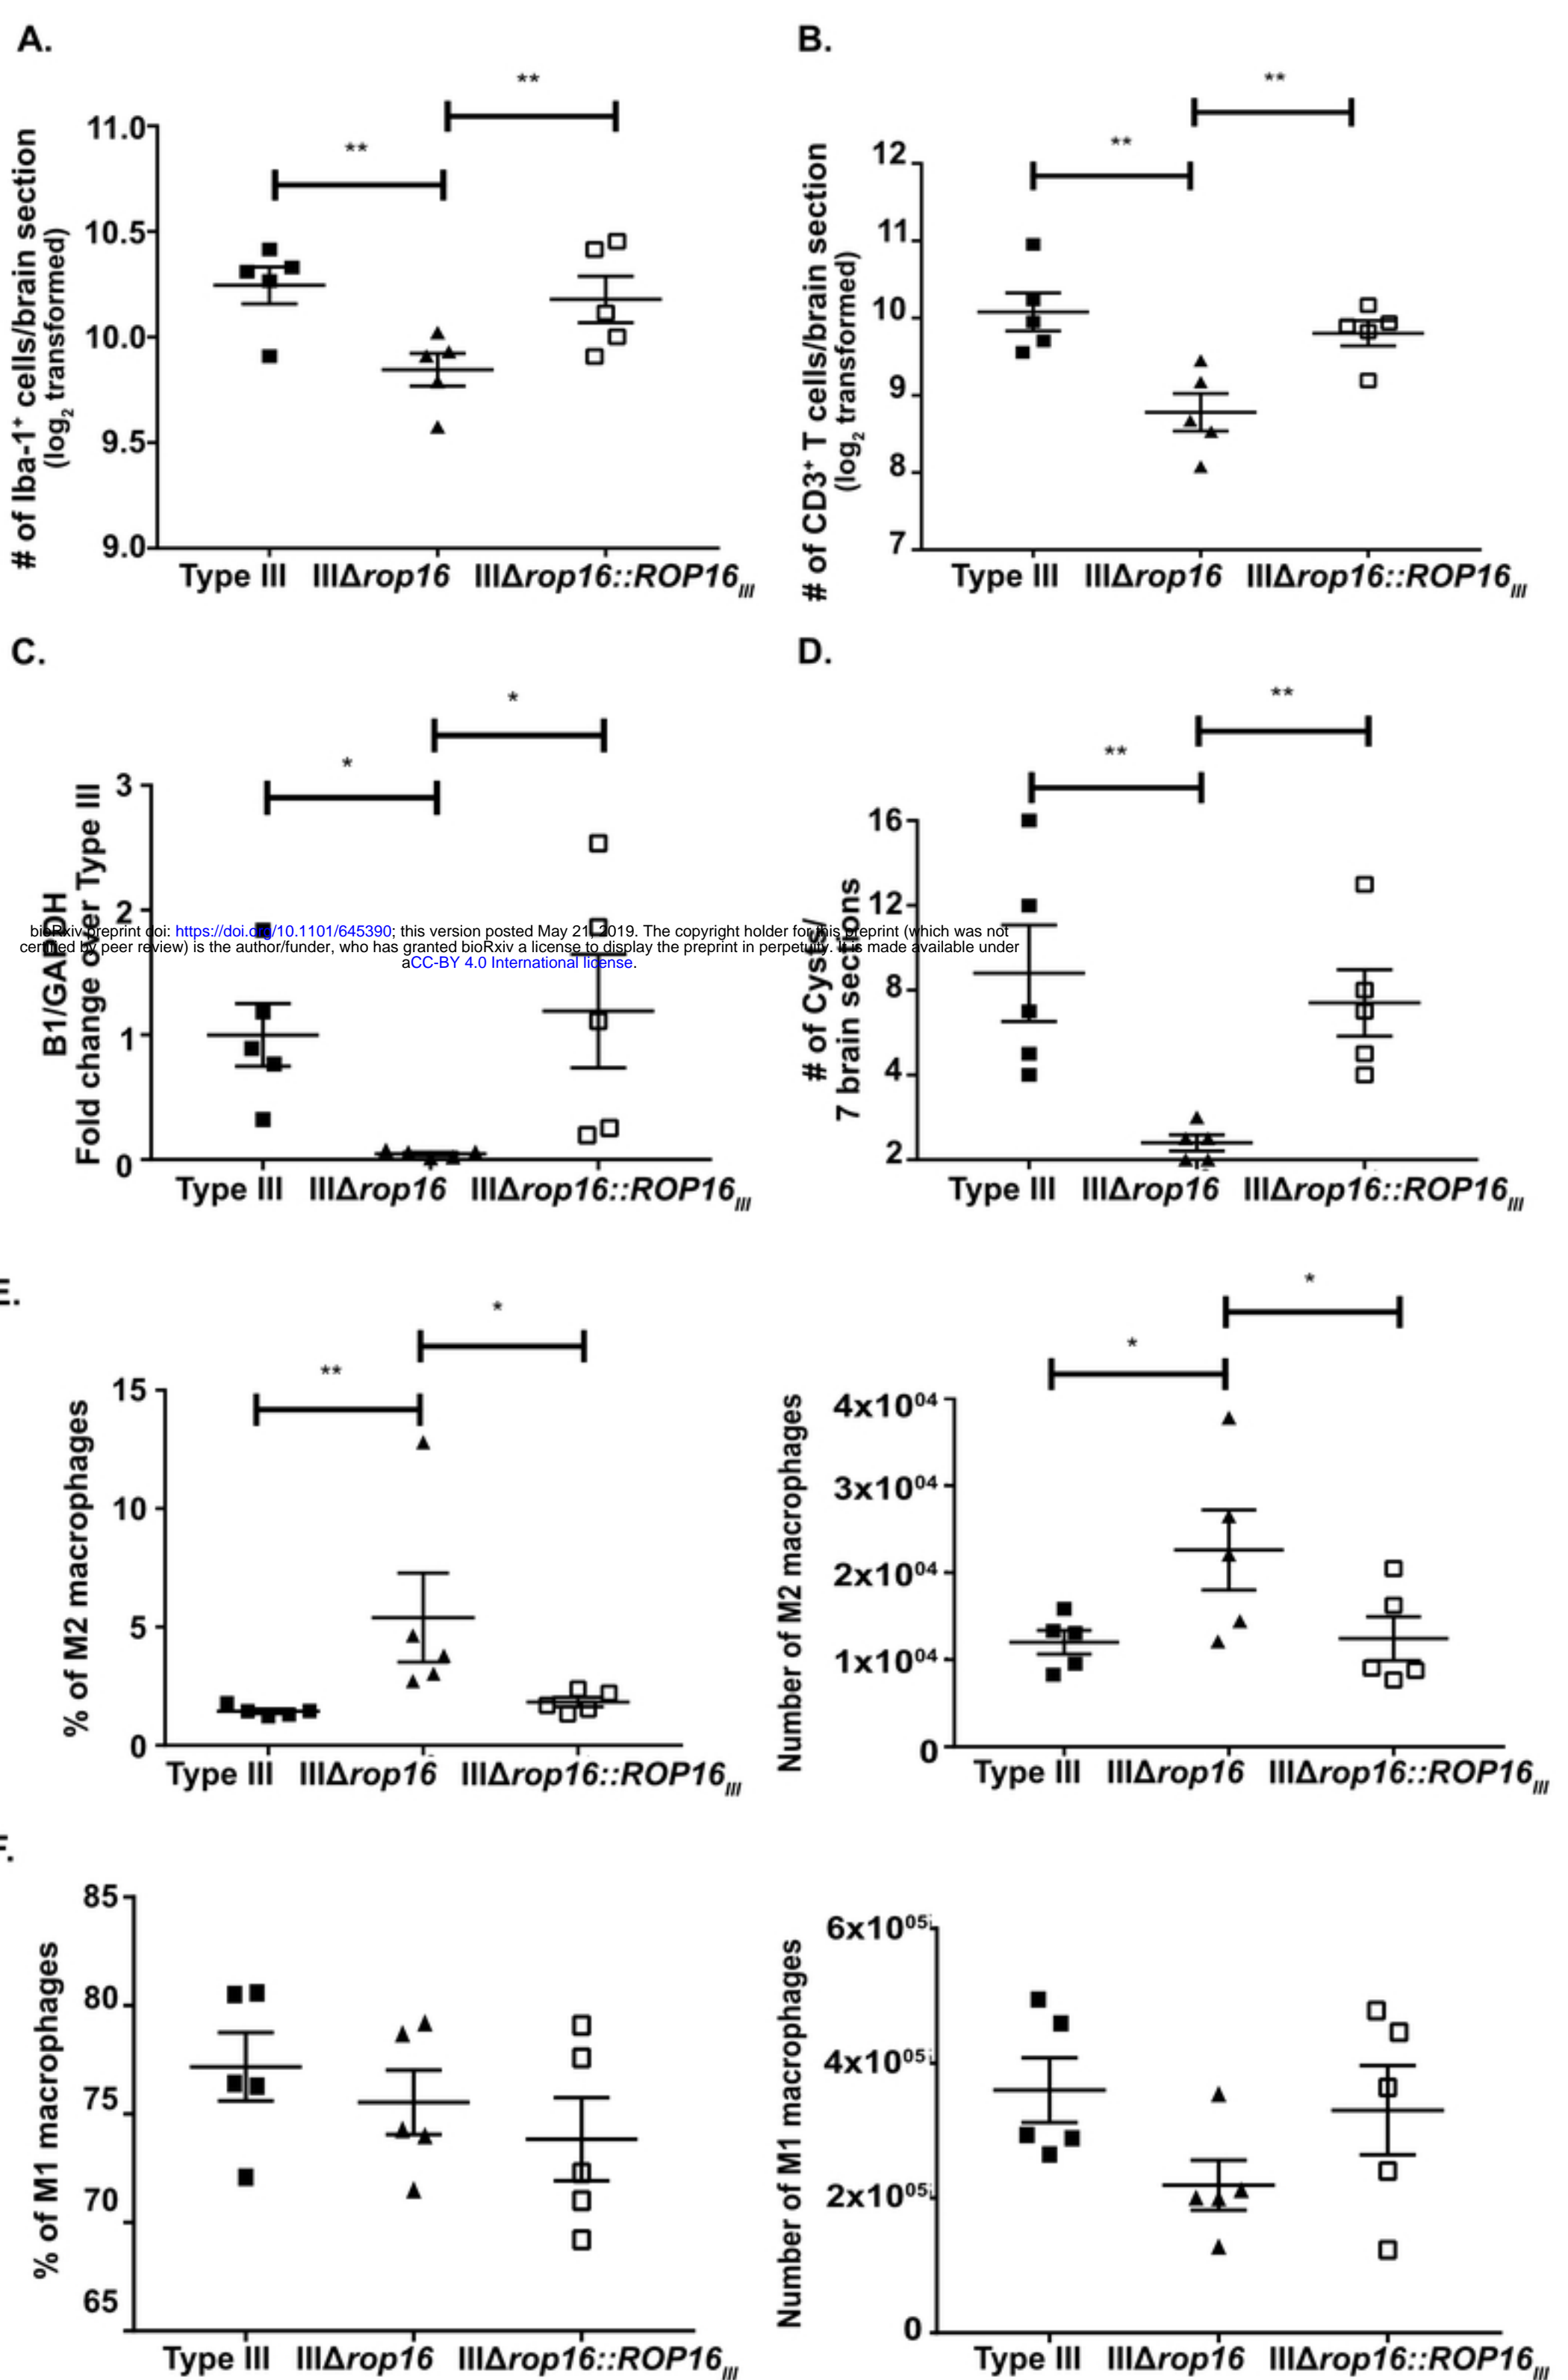

Figure 9

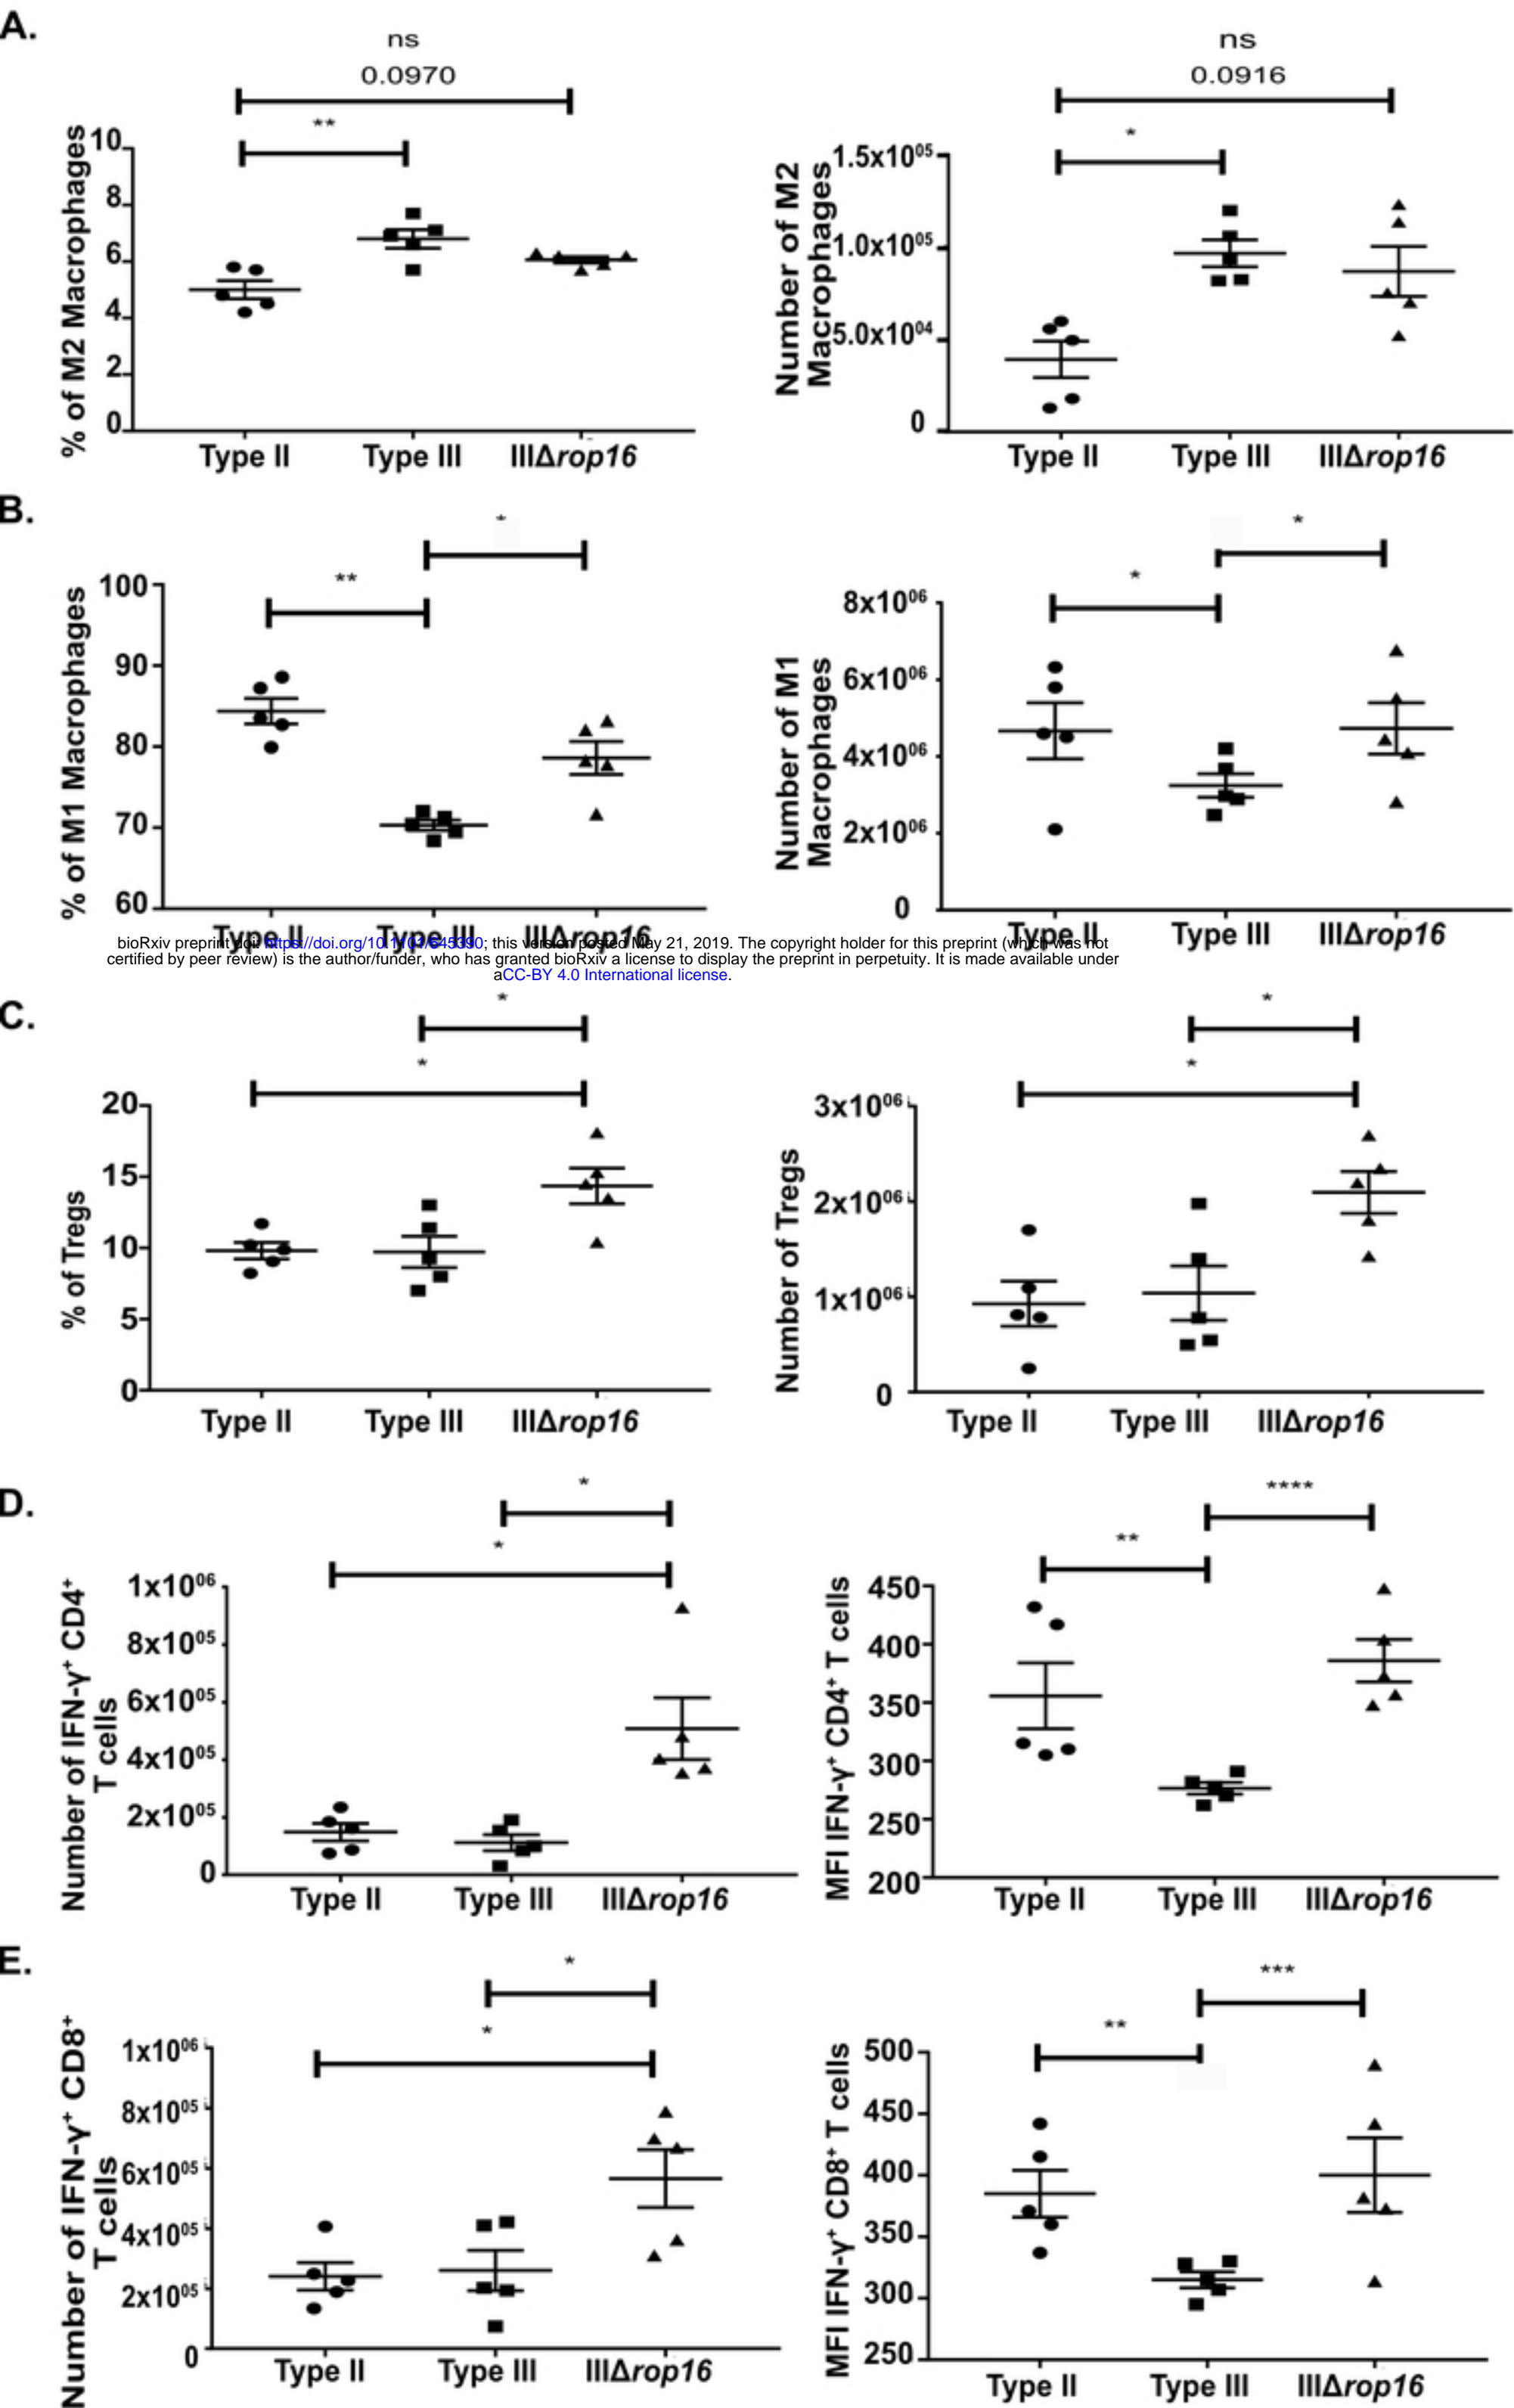

Figure 10

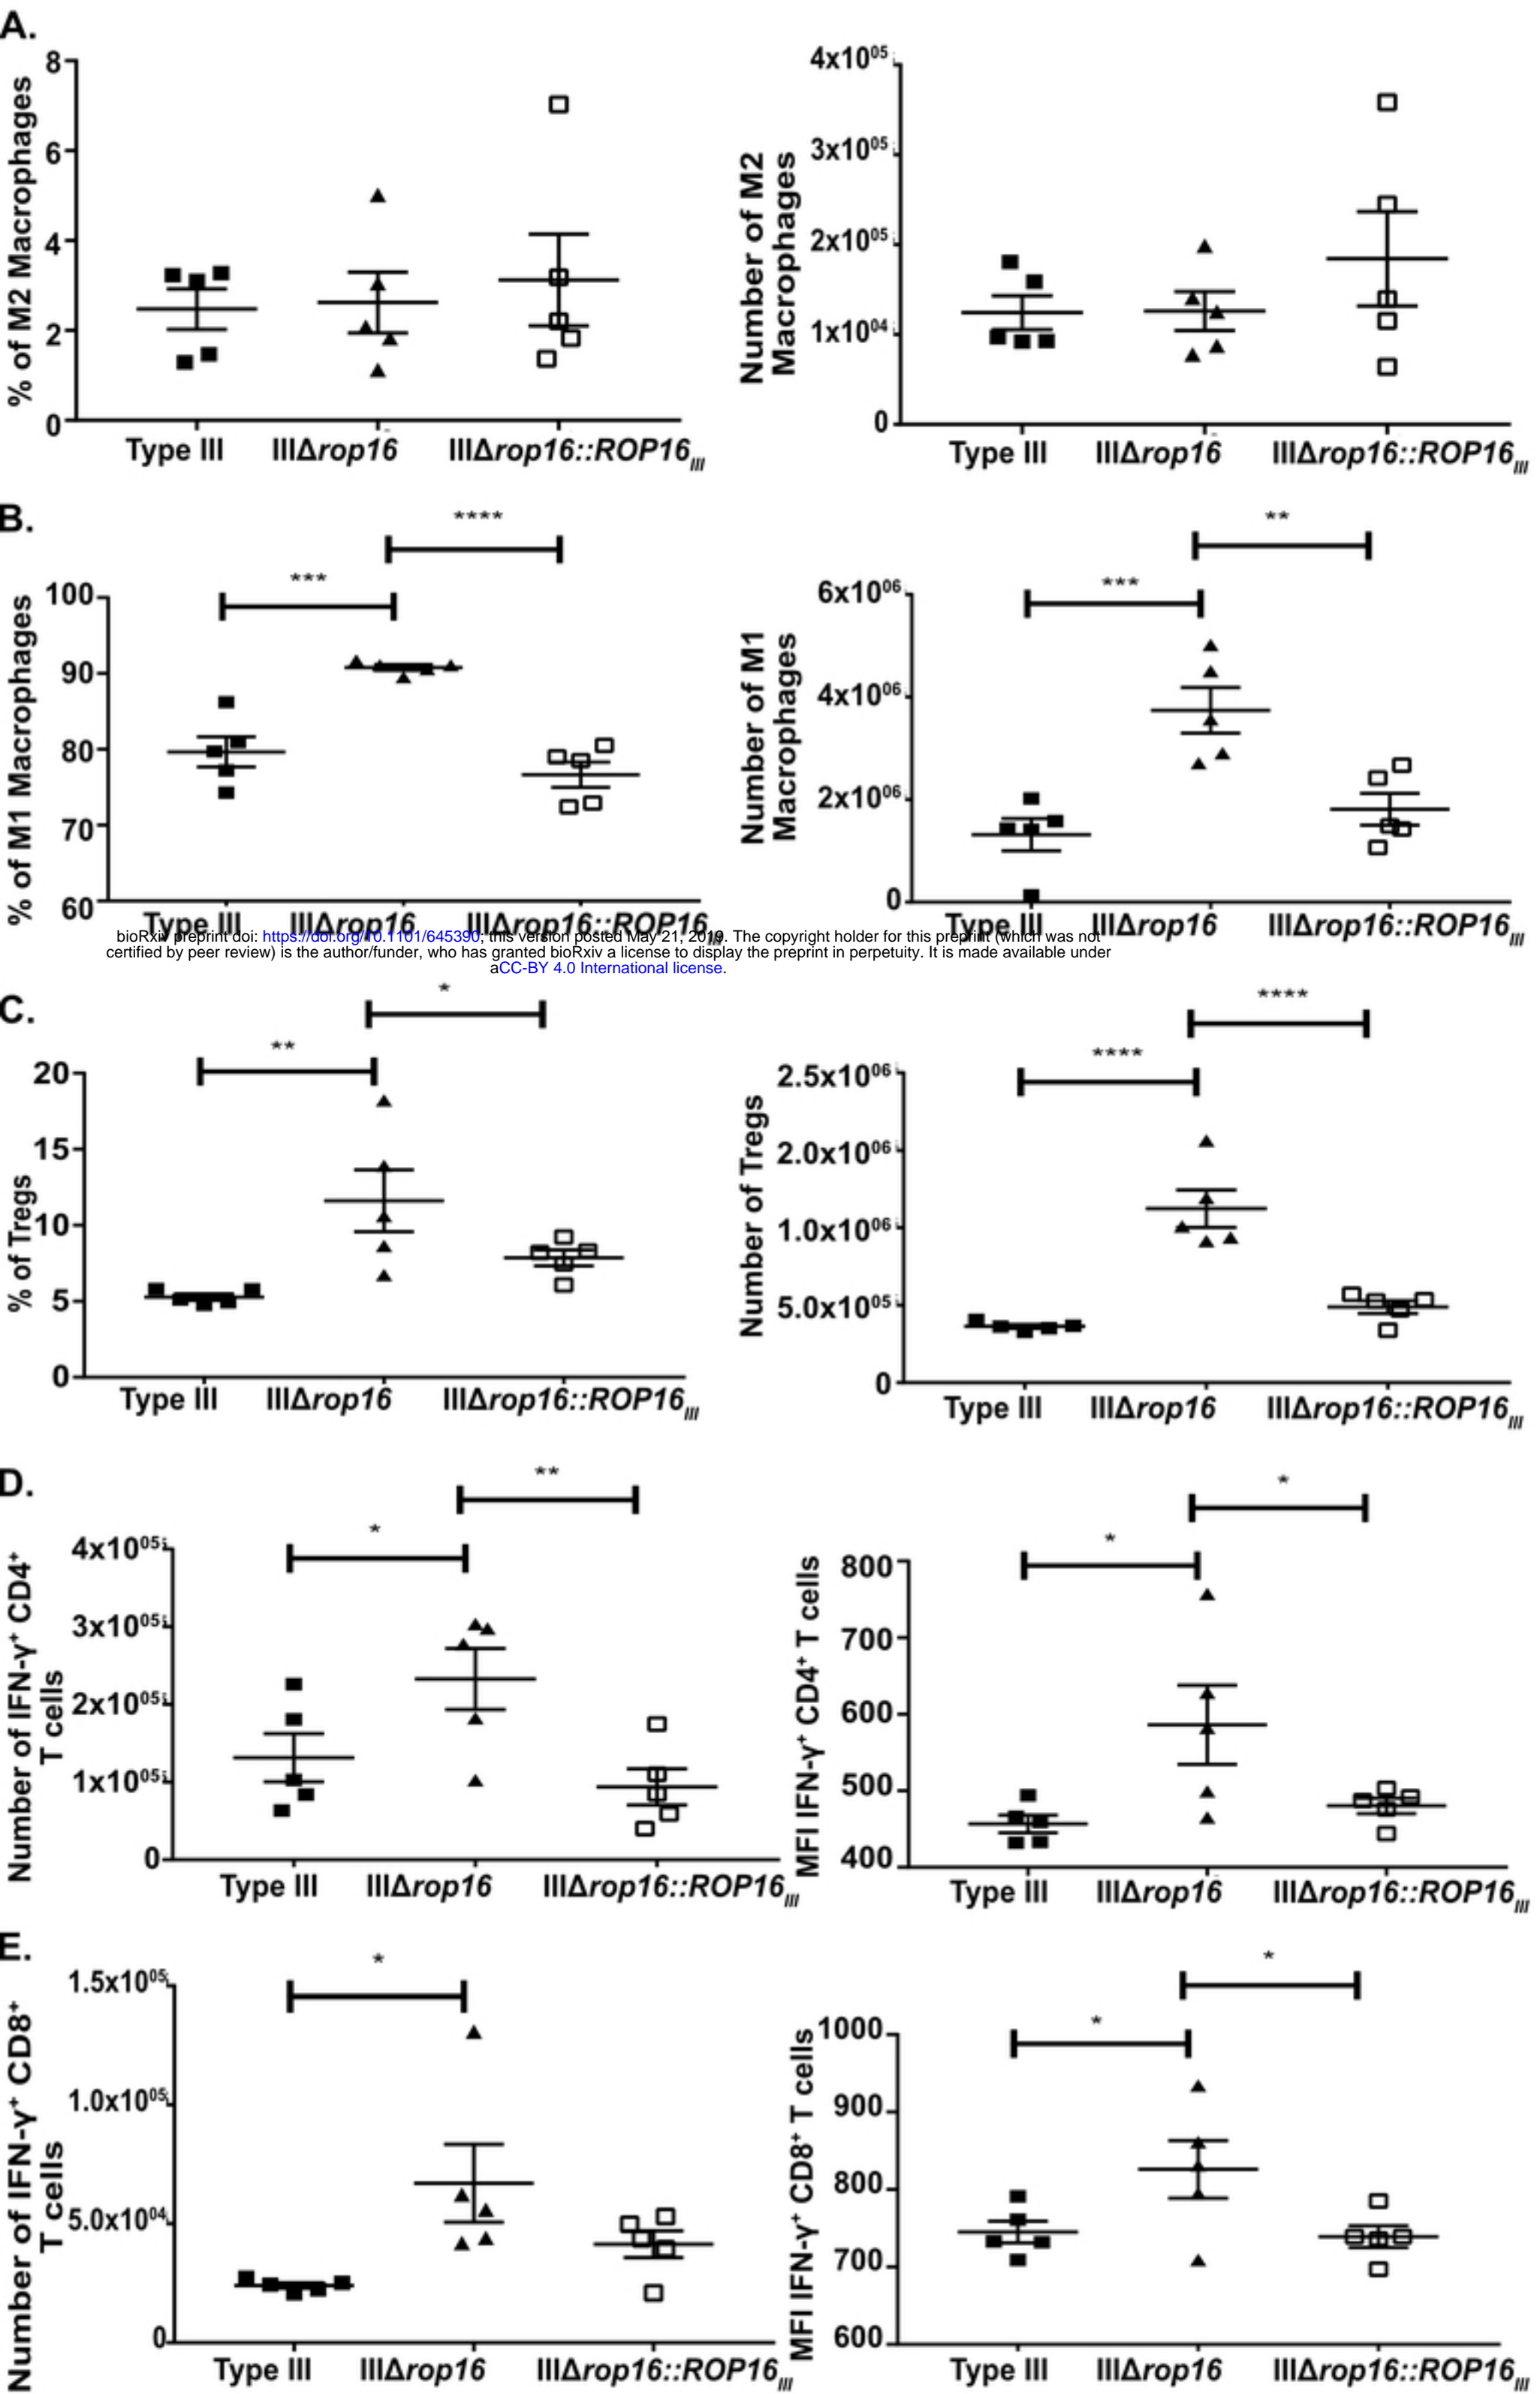

Figure 11

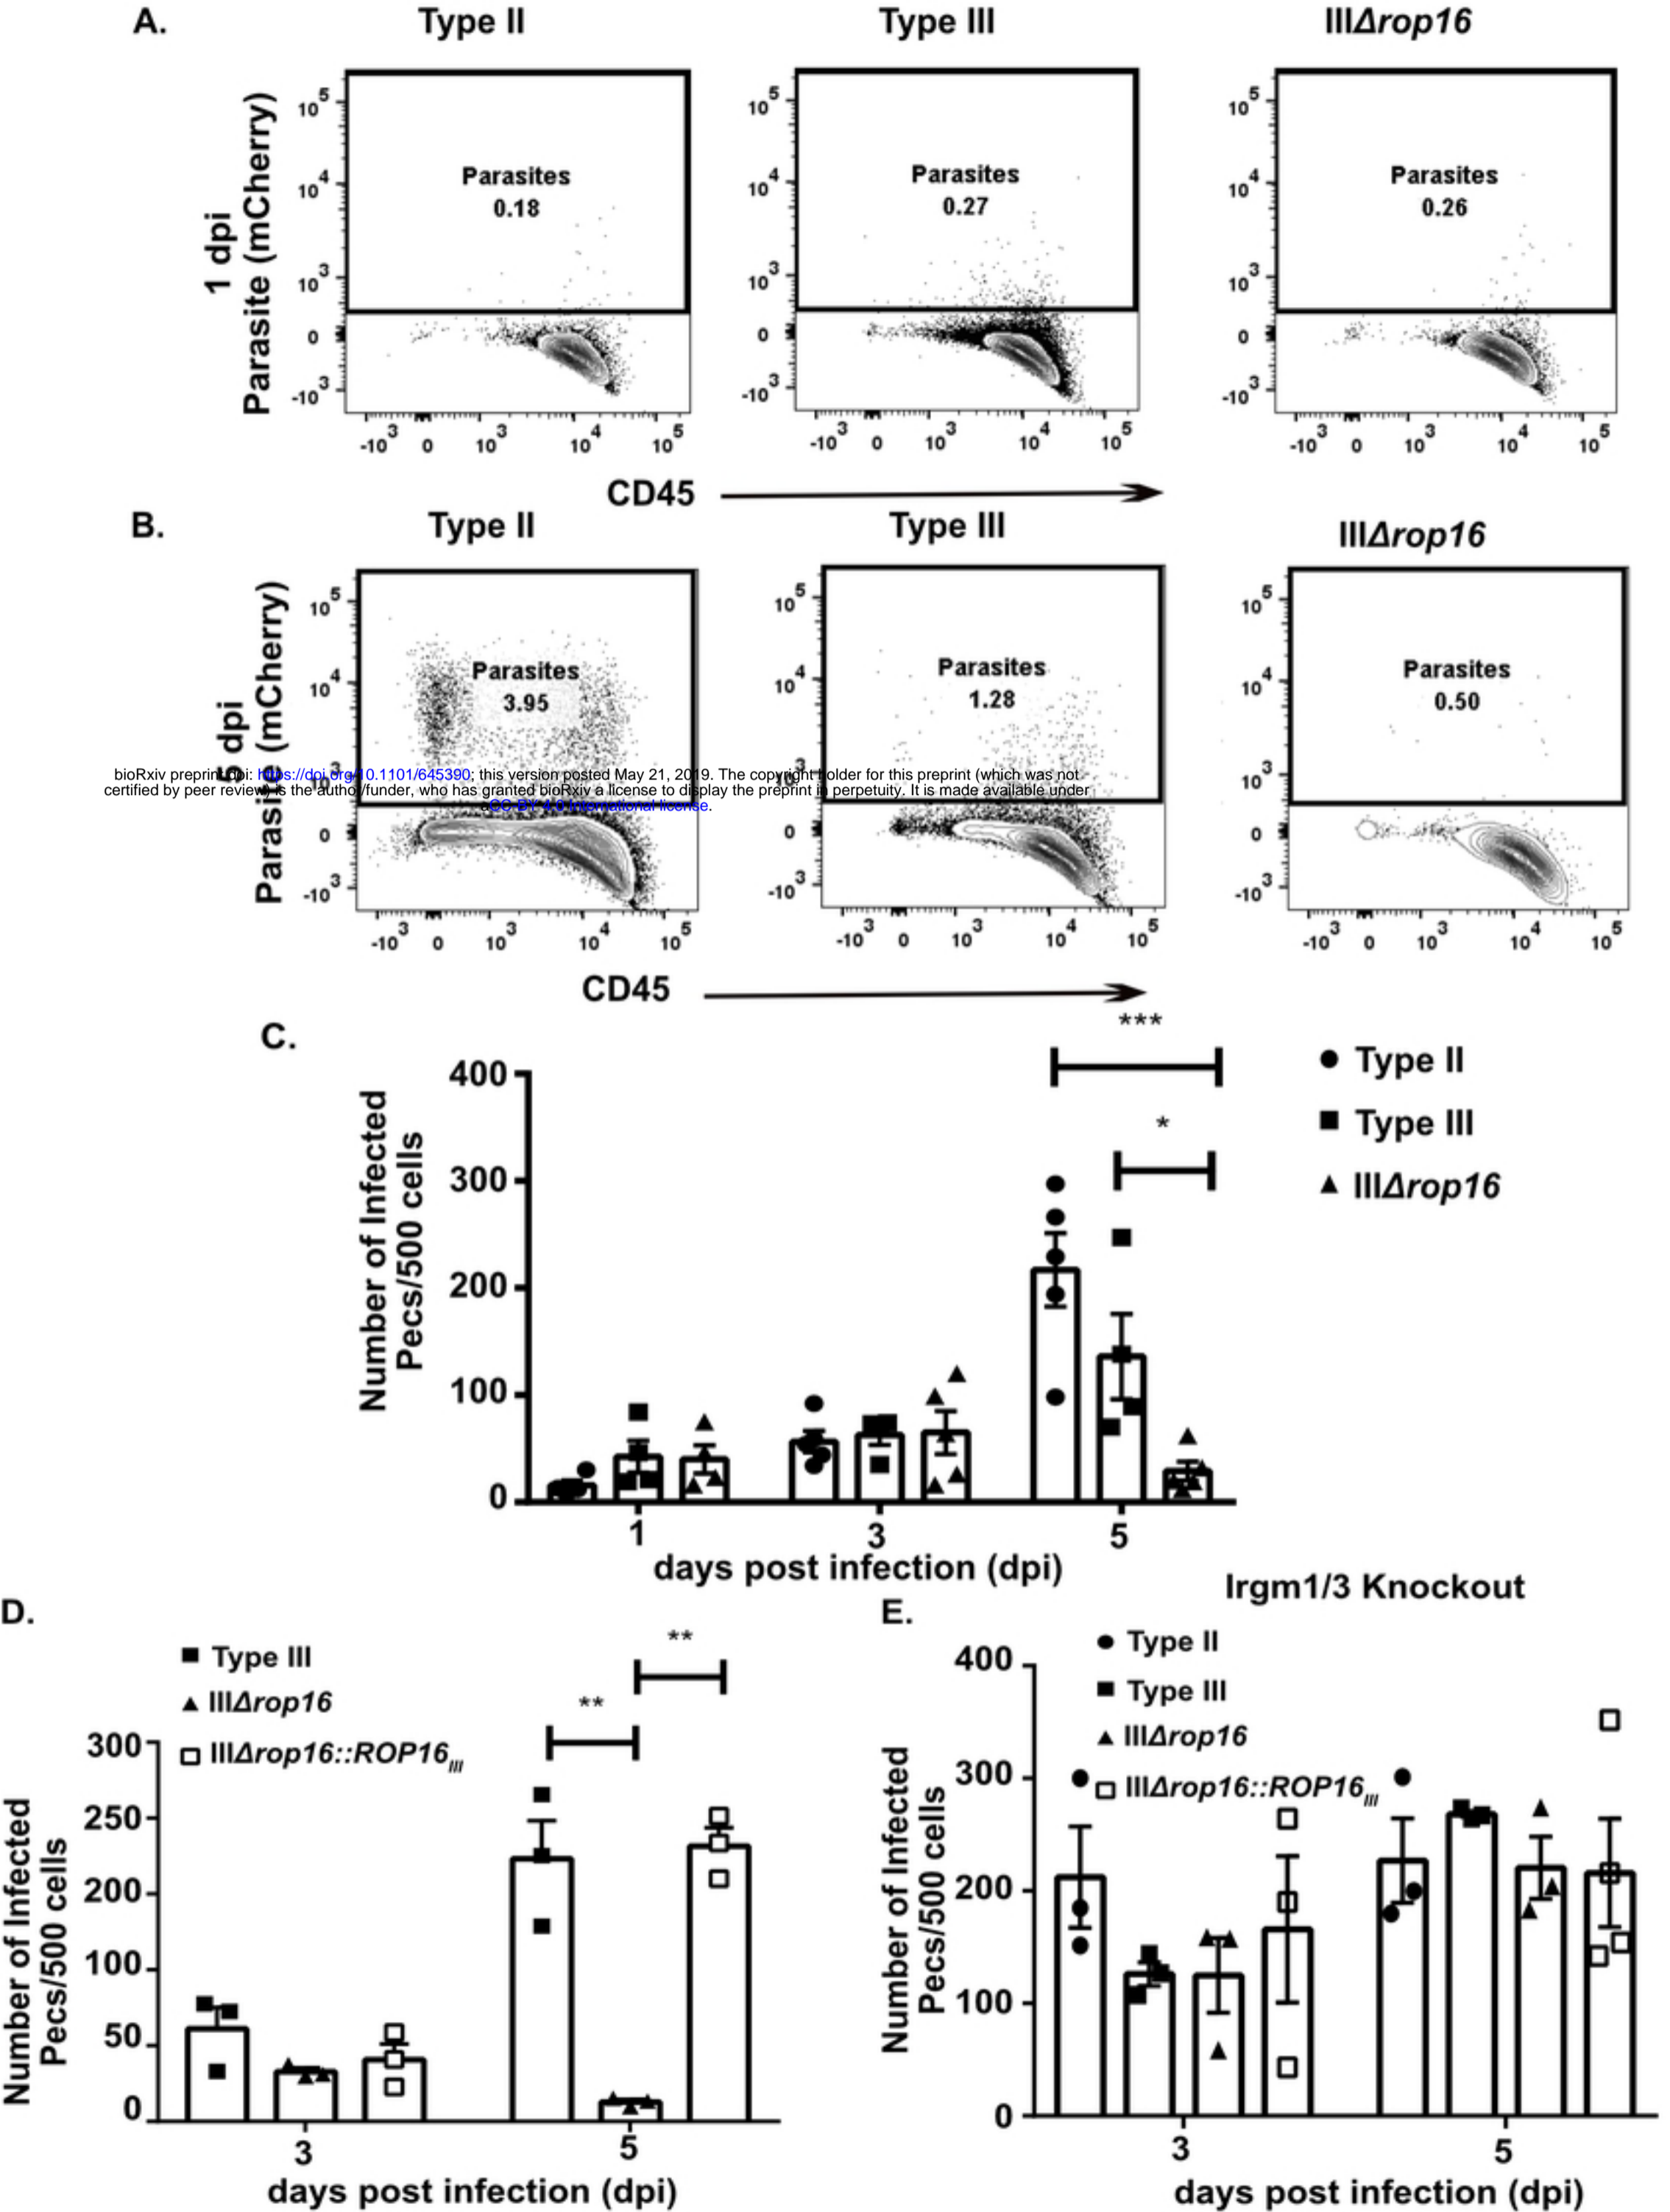

bioRxiv preprint doi: <https://doi.org/10.1101/645390>; this version posted May 21, 2019. The copyright holder for this preprint (which was not certified by peer review) is the author/funder, who has granted bioRxiv a license to display the preprint in perpetuity. It is made available under aCC-BY 4.0 International license.

Figure 12
